# Supplementary material for: RNF43 inhibits WNT5A-driven signaling and suppresses melanoma invasion and resistance to the targeted therapy
Source: eLife. 2021 Oct 27;10:e65759. doi: 10.7554/eLife.65759 (PMC8550759; doi:10.7554/eLife.65759)
Supplement: Figure 1—source data 1. [file elife-65759-fig1-data1.xlsx]

## Sheet: BioID -  RNF43 interactors
yourlist:M20200117E5A08BB0B2D1C45B0C7BC3B55FD2655673F2E22	Entry	Entry name	Status	Protein names	Gene names	Organism	Length
A0A2R8YDH4	A0A2R8YDH4	A0A2R8YDH4_HUMAN	unreviewed	Uncharacterized protein		Homo sapiens (Human)	1319
A2RUB1	A2RUB1	MEIOC_HUMAN	reviewed	Meiosis-specific coiled-coil domain-containing protein MEIOC (Meiosis-specific with coiled-coil domain protein)	MEIOC C17orf104	Homo sapiens (Human)	952
A2VDJ0	A2VDJ0	T131L_HUMAN	reviewed	Transmembrane protein 131-like	TMEM131L KIAA0922	Homo sapiens (Human)	1609
A5YKK6	A5YKK6	CNOT1_HUMAN	reviewed	CCR4-NOT transcription complex subunit 1 (CCR4-associated factor 1) (Negative regulator of transcription subunit 1 homolog) (NOT1H) (hNOT1)	CNOT1 CDC39 KIAA1007 NOT1 AD-005	Homo sapiens (Human)	2376
A6NKD9	A6NKD9	CC85C_HUMAN	reviewed	Coiled-coil domain-containing protein 85C	CCDC85C	Homo sapiens (Human)	419
A7KAX9	A7KAX9	RHG32_HUMAN	reviewed	Rho GTPase-activating protein 32 (Brain-specific Rho GTPase-activating protein) (GAB-associated Cdc42/Rac GTPase-activating protein) (GC-GAP) (GTPase regulator interacting with TrkA) (Rho-type GTPase-activating protein 32) (Rho/Cdc42/Rac GTPase-activating protein RICS) (RhoGAP involved in the beta-catenin-N-cadherin and NMDA receptor signaling) (p200RhoGAP) (p250GAP)	ARHGAP32 GRIT KIAA0712 RICS	Homo sapiens (Human)	2087
A8CG34	A8CG34	P121C_HUMAN	reviewed	Nuclear envelope pore membrane protein POM 121C (Nuclear pore membrane protein 121-2) (POM121-2) (Pore membrane protein of 121 kDa C)	POM121C	Homo sapiens (Human)	1229
O00161	O00161	SNP23_HUMAN	reviewed	Synaptosomal-associated protein 23 (SNAP-23) (Vesicle-membrane fusion protein SNAP-23)	SNAP23	Homo sapiens (Human)	211
O00213	O00213	APBB1_HUMAN	reviewed	Amyloid-beta A4 precursor protein-binding family B member 1 (Protein Fe65)	APBB1 FE65 RIR	Homo sapiens (Human)	710
O14497	O14497	ARI1A_HUMAN	reviewed	AT-rich interactive domain-containing protein 1A (ARID domain-containing protein 1A) (B120) (BRG1-associated factor 250) (BAF250) (BRG1-associated factor 250a) (BAF250A) (Osa homolog 1) (hOSA1) (SWI-like protein) (SWI/SNF complex protein p270) (SWI/SNF-related, matrix-associated, actin-dependent regulator of chromatin subfamily F member 1) (hELD)	ARID1A BAF250 BAF250A C1orf4 OSA1 SMARCF1	Homo sapiens (Human)	2285
O14617	O14617	AP3D1_HUMAN	reviewed	AP-3 complex subunit delta-1 (AP-3 complex subunit delta) (Adaptor-related protein complex 3 subunit delta-1) (Delta-adaptin)	AP3D1 PRO0039	Homo sapiens (Human)	1153
O14639	O14639	ABLM1_HUMAN	reviewed	Actin-binding LIM protein 1 (abLIM-1) (Actin-binding LIM protein family member 1) (Actin-binding double zinc finger protein) (LIMAB1) (Limatin)	ABLIM1 ABLIM KIAA0059 LIMAB1	Homo sapiens (Human)	778
O14640	O14640	DVL1_HUMAN	reviewed	Segment polarity protein dishevelled homolog DVL-1 (Dishevelled-1) (DSH homolog 1)	DVL1	Homo sapiens (Human)	695
O14641	O14641	DVL2_HUMAN	reviewed	Segment polarity protein dishevelled homolog DVL-2 (Dishevelled-2) (DSH homolog 2)	DVL2	Homo sapiens (Human)	736
O14654	O14654	IRS4_HUMAN	reviewed	Insulin receptor substrate 4 (IRS-4) (160 kDa phosphotyrosine protein) (py160) (Phosphoprotein of 160 kDa) (pp160)	IRS4	Homo sapiens (Human)	1257
O14776	O14776	TCRG1_HUMAN	reviewed	Transcription elongation regulator 1 (TATA box-binding protein-associated factor 2S) (Transcription factor CA150)	TCERG1 CA150 TAF2S	Homo sapiens (Human)	1098
O14964	O14964	HGS_HUMAN	reviewed	Hepatocyte growth factor-regulated tyrosine kinase substrate (Hrs) (Protein pp110)	HGS HRS	Homo sapiens (Human)	777
O15027	O15027	SC16A_HUMAN	reviewed	Protein transport protein Sec16A (SEC16 homolog A) (p250)	SEC16A KIAA0310 SEC16 SEC16L	Homo sapiens (Human)	2357
O15037	O15037	KHNYN_HUMAN	reviewed	Protein KHNYN (KH and NYN domain-containing protein)	KHNYN KIAA0323	Homo sapiens (Human)	678
O15061	O15061	SYNEM_HUMAN	reviewed	Synemin (Desmuslin)	SYNM DMN KIAA0353 SYN	Homo sapiens (Human)	1565
O15169	O15169	AXIN1_HUMAN	reviewed	Axin-1 (Axis inhibition protein 1) (hAxin)	AXIN1 AXIN	Homo sapiens (Human)	862
O15504	O15504	NUP42_HUMAN	reviewed	Nucleoporin NUP42 (NLP-1) (NUP42 homolog) (Nucleoporin hCG1) (Nucleoporin-42) (Nucleoporin-like protein 2)	NUP42 CG1 NUPL2	Homo sapiens (Human)	423
O43809	O43809	CPSF5_HUMAN	reviewed	Cleavage and polyadenylation specificity factor subunit 5 (Cleavage and polyadenylation specificity factor 25 kDa subunit) (CPSF 25 kDa subunit) (Cleavage factor Im complex 25 kDa subunit) (CFIm25) (Nucleoside diphosphate-linked moiety X motif 21) (Nudix motif 21) (Nudix hydrolase 21) (Pre-mRNA cleavage factor Im 68 kDa subunit)	NUDT21 CFIM25 CPSF25 CPSF5	Homo sapiens (Human)	227
O60716	O60716	CTND1_HUMAN	reviewed	Catenin delta-1 (Cadherin-associated Src substrate) (CAS) (p120 catenin) (p120(ctn)) (p120(cas))	CTNND1 KIAA0384	Homo sapiens (Human)	968
O60858	O60858	TRI13_HUMAN	reviewed	E3 ubiquitin-protein ligase TRIM13 (EC 2.3.2.27) (B-cell chronic lymphocytic leukemia tumor suppressor Leu5) (Leukemia-associated protein 5) (Putative tumor suppressor RFP2) (RING finger protein 77) (RING-type E3 ubiquitin transferase TRIM13) (Ret finger protein 2) (Tripartite motif-containing protein 13)	TRIM13 LEU5 RFP2 RNF77	Homo sapiens (Human)	407
O75113	O75113	N4BP1_HUMAN	reviewed	NEDD4-binding protein 1 (N4BP1)	N4BP1 KIAA0615	Homo sapiens (Human)	896
O75182	O75182	SIN3B_HUMAN	reviewed	Paired amphipathic helix protein Sin3b (Histone deacetylase complex subunit Sin3b) (Transcriptional corepressor Sin3b)	SIN3B KIAA0700	Homo sapiens (Human)	1162
O75410	O75410	TACC1_HUMAN	reviewed	Transforming acidic coiled-coil-containing protein 1 (Gastric cancer antigen Ga55) (Taxin-1)	TACC1 KIAA1103	Homo sapiens (Human)	805
O75420	O75420	GGYF1_HUMAN	reviewed	GRB10-interacting GYF protein 1 (PERQ amino acid-rich with GYF domain-containing protein 1)	GIGYF1 CDS2 PERQ1 PP3360	Homo sapiens (Human)	1035
O75694	O75694	NU155_HUMAN	reviewed	Nuclear pore complex protein Nup155 (155 kDa nucleoporin) (Nucleoporin Nup155)	NUP155 KIAA0791	Homo sapiens (Human)	1391
O75976	O75976	CBPD_HUMAN	reviewed	Carboxypeptidase D (EC 3.4.17.22) (Metallocarboxypeptidase D) (gp180)	CPD	Homo sapiens (Human)	1380
O95210	O95210	STBD1_HUMAN	reviewed	Starch-binding domain-containing protein 1 (Genethonin-1) (Glycophagy cargo receptor STBD1)	STBD1 GENX-3414	Homo sapiens (Human)	358
O95425	O95425	SVIL_HUMAN	reviewed	Supervillin (Archvillin) (p205/p250)	SVIL	Homo sapiens (Human)	2214
O95486	O95486	SC24A_HUMAN	reviewed	Protein transport protein Sec24A (SEC24-related protein A)	SEC24A	Homo sapiens (Human)	1093
O95487	O95487	SC24B_HUMAN	reviewed	Protein transport protein Sec24B (SEC24-related protein B)	SEC24B	Homo sapiens (Human)	1268
O95819	O95819	M4K4_HUMAN	reviewed	Mitogen-activated protein kinase kinase kinase kinase 4 (EC 2.7.11.1) (HPK/GCK-like kinase HGK) (MAPK/ERK kinase kinase kinase 4) (MEK kinase kinase 4) (MEKKK 4) (Nck-interacting kinase)	MAP4K4 HGK KIAA0687 NIK	Homo sapiens (Human)	1239
P06493	P06493	CDK1_HUMAN	reviewed	Cyclin-dependent kinase 1 (CDK1) (EC 2.7.11.22) (EC 2.7.11.23) (Cell division control protein 2 homolog) (Cell division protein kinase 1) (p34 protein kinase)	CDK1 CDC2 CDC28A CDKN1 P34CDC2	Homo sapiens (Human)	297
P07237	P07237	PDIA1_HUMAN	reviewed	Protein disulfide-isomerase (PDI) (EC 5.3.4.1) (Cellular thyroid hormone-binding protein) (Prolyl 4-hydroxylase subunit beta) (p55)	P4HB ERBA2L PDI PDIA1 PO4DB	Homo sapiens (Human)	508
P08670	P08670	VIME_HUMAN	reviewed	Vimentin	VIM	Homo sapiens (Human)	466
P09234	P09234	RU1C_HUMAN	reviewed	U1 small nuclear ribonucleoprotein C (U1 snRNP C) (U1-C) (U1C)	SNRPC	Homo sapiens (Human)	159
P09651	P09651	ROA1_HUMAN	reviewed	Heterogeneous nuclear ribonucleoprotein A1 (hnRNP A1) (Helix-destabilizing protein) (Single-strand RNA-binding protein) (hnRNP core protein A1) [Cleaved into: Heterogeneous nuclear ribonucleoprotein A1, N-terminally processed]	HNRNPA1 HNRPA1	Homo sapiens (Human)	372
P10071	P10071	GLI3_HUMAN	reviewed	Transcriptional activator GLI3 (GLI3 form of 190 kDa) (GLI3-190) (GLI3 full-length protein) (GLI3FL) [Cleaved into: Transcriptional repressor GLI3R (GLI3 C-terminally truncated form) (GLI3 form of 83 kDa) (GLI3-83)]	GLI3	Homo sapiens (Human)	1580
P11021	P11021	BIP_HUMAN	reviewed	Endoplasmic reticulum chaperone BiP (EC 3.6.4.10) (78 kDa glucose-regulated protein) (GRP-78) (Binding-immunoglobulin protein) (BiP) (Heat shock protein 70 family protein 5) (HSP70 family protein 5) (Heat shock protein family A member 5) (Immunoglobulin heavy chain-binding protein)	HSPA5 GRP78	Homo sapiens (Human)	654
P14625	P14625	ENPL_HUMAN	reviewed	Endoplasmin (94 kDa glucose-regulated protein) (GRP-94) (Heat shock protein 90 kDa beta member 1) (Tumor rejection antigen 1) (gp96 homolog)	HSP90B1 GRP94 TRA1	Homo sapiens (Human)	803
P17844	P17844	DDX5_HUMAN	reviewed	Probable ATP-dependent RNA helicase DDX5 (EC 3.6.4.13) (DEAD box protein 5) (RNA helicase p68)	DDX5 G17P1 HELR HLR1	Homo sapiens (Human)	614
Q16720	Q16720	AT2B3_HUMAN	reviewed	Plasma membrane calcium-transporting ATPase 3 (PMCA3) (EC 7.2.2.10) (Plasma membrane calcium ATPase isoform 3) (Plasma membrane calcium pump isoform 3)	ATP2B3	Homo sapiens (Human)	1220
P22626	P22626	ROA2_HUMAN	reviewed	Heterogeneous nuclear ribonucleoproteins A2/B1 (hnRNP A2/B1)	HNRNPA2B1 HNRPA2B1	Homo sapiens (Human)	353
P25054	P25054	APC_HUMAN	reviewed	Adenomatous polyposis coli protein (Protein APC) (Deleted in polyposis 2.5)	APC DP2.5	Homo sapiens (Human)	2843
P27105	P27105	STOM_HUMAN	reviewed	Erythrocyte band 7 integral membrane protein (Protein 7.2b) (Stomatin)	STOM BND7 EPB72	Homo sapiens (Human)	288
P27824	P27824	CALX_HUMAN	reviewed	Calnexin (IP90) (Major histocompatibility complex class I antigen-binding protein p88) (p90)	CANX	Homo sapiens (Human)	592
P29317	P29317	EPHA2_HUMAN	reviewed	Ephrin type-A receptor 2 (EC 2.7.10.1) (Epithelial cell kinase) (Tyrosine-protein kinase receptor ECK)	EPHA2 ECK	Homo sapiens (Human)	976
P30101	P30101	PDIA3_HUMAN	reviewed	Protein disulfide-isomerase A3 (EC 5.3.4.1) (58 kDa glucose-regulated protein) (58 kDa microsomal protein) (p58) (Disulfide isomerase ER-60) (Endoplasmic reticulum resident protein 57) (ER protein 57) (ERp57) (Endoplasmic reticulum resident protein 60) (ER protein 60) (ERp60)	PDIA3 ERP57 ERP60 GRP58	Homo sapiens (Human)	505
P33981	P33981	TTK_HUMAN	reviewed	Dual specificity protein kinase TTK (EC 2.7.12.1) (Phosphotyrosine picked threonine-protein kinase) (PYT)	TTK MPS1 MPS1L1	Homo sapiens (Human)	857
P42694	P42694	HELZ_HUMAN	reviewed	Probable helicase with zinc finger domain (EC 3.6.4.-) (Down-regulated in human cancers protein)	HELZ DRHC KIAA0054	Homo sapiens (Human)	1942
P43243	P43243	MATR3_HUMAN	reviewed	Matrin-3	MATR3 KIAA0723	Homo sapiens (Human)	847
P46013	P46013	KI67_HUMAN	reviewed	Proliferation marker protein Ki-67 (Antigen identified by monoclonal antibody Ki-67) (Antigen KI-67) (Antigen Ki67)	MKI67	Homo sapiens (Human)	3256
P46939	P46939	UTRO_HUMAN	reviewed	Utrophin (Dystrophin-related protein 1) (DRP-1)	UTRN DMDL DRP1	Homo sapiens (Human)	3433
P48729	P48729	KC1A_HUMAN	reviewed	Casein kinase I isoform alpha (CKI-alpha) (EC 2.7.11.1) (CK1)	CSNK1A1	Homo sapiens (Human)	337
P49069	P49069	CAMLG_HUMAN	reviewed	Calcium signal-modulating cyclophilin ligand (CAML)	CAMLG CAML	Homo sapiens (Human)	296
P49674	P49674	KC1E_HUMAN	reviewed	Casein kinase I isoform epsilon (CKI-epsilon) (CKIe) (EC 2.7.11.1)	CSNK1E	Homo sapiens (Human)	416
P49757	P49757	NUMB_HUMAN	reviewed	Protein numb homolog (h-Numb) (Protein S171)	NUMB C14orf41	Homo sapiens (Human)	651
P49790	P49790	NU153_HUMAN	reviewed	Nuclear pore complex protein Nup153 (153 kDa nucleoporin) (Nucleoporin Nup153)	NUP153	Homo sapiens (Human)	1475
P49792	P49792	RBP2_HUMAN	reviewed	E3 SUMO-protein ligase RanBP2 (EC 2.3.2.-) (358 kDa nucleoporin) (Nuclear pore complex protein Nup358) (Nucleoporin Nup358) (Ran-binding protein 2) (RanBP2) (p270)	RANBP2 NUP358	Homo sapiens (Human)	3224
P49914	P49914	MTHFS_HUMAN	reviewed	5-formyltetrahydrofolate cyclo-ligase (EC 6.3.3.2) (5,10-methenyl-tetrahydrofolate synthetase) (MTHFS) (Methenyl-THF synthetase)	MTHFS	Homo sapiens (Human)	203
P50402	P50402	EMD_HUMAN	reviewed	Emerin	EMD EDMD STA	Homo sapiens (Human)	254
P50454	P50454	SERPH_HUMAN	reviewed	Serpin H1 (47 kDa heat shock protein) (Arsenic-transactivated protein 3) (AsTP3) (Cell proliferation-inducing gene 14 protein) (Collagen-binding protein) (Colligin) (Rheumatoid arthritis-related antigen RA-A47)	SERPINH1 CBP1 CBP2 HSP47 SERPINH2 PIG14	Homo sapiens (Human)	418
P50851	P50851	LRBA_HUMAN	reviewed	Lipopolysaccharide-responsive and beige-like anchor protein (Beige-like protein) (CDC4-like protein)	LRBA BGL CDC4L LBA	Homo sapiens (Human)	2863
P51617	P51617	IRAK1_HUMAN	reviewed	Interleukin-1 receptor-associated kinase 1 (IRAK-1) (EC 2.7.11.1)	IRAK1 IRAK	Homo sapiens (Human)	712
P51648	P51648	AL3A2_HUMAN	reviewed	Aldehyde dehydrogenase family 3 member A2 (EC 1.2.1.3) (EC 1.2.1.94) (Aldehyde dehydrogenase 10) (Fatty aldehyde dehydrogenase) (Microsomal aldehyde dehydrogenase)	ALDH3A2 ALDH10 FALDH	Homo sapiens (Human)	485
P51991	P51991	ROA3_HUMAN	reviewed	Heterogeneous nuclear ribonucleoprotein A3 (hnRNP A3)	HNRNPA3 HNRPA3	Homo sapiens (Human)	378
P52272	P52272	HNRPM_HUMAN	reviewed	Heterogeneous nuclear ribonucleoprotein M (hnRNP M)	HNRNPM HNRPM NAGR1	Homo sapiens (Human)	730
P52655	P52655	TF2AA_HUMAN	reviewed	Transcription initiation factor IIA subunit 1 (General transcription factor IIA subunit 1) (TFIIAL) (Transcription initiation factor TFIIA 42 kDa subunit) (TFIIA-42) [Cleaved into: Transcription initiation factor IIA alpha chain (TFIIA p35 subunit); Transcription initiation factor IIA beta chain (TFIIA p19 subunit)]	GTF2A1 TF2A1	Homo sapiens (Human)	376
P55011	P55011	S12A2_HUMAN	reviewed	Solute carrier family 12 member 2 (Basolateral Na-K-Cl symporter) (Bumetanide-sensitive sodium-(potassium)-chloride cotransporter 2)	SLC12A2 NKCC1	Homo sapiens (Human)	1212
P55209	P55209	NP1L1_HUMAN	reviewed	Nucleosome assembly protein 1-like 1 (NAP-1-related protein) (hNRP)	NAP1L1 NRP	Homo sapiens (Human)	391
P61956	P61956	SUMO2_HUMAN	reviewed	Small ubiquitin-related modifier 2 (SUMO-2) (HSMT3) (SMT3 homolog 2) (SUMO-3) (Sentrin-2) (Ubiquitin-like protein SMT3B) (Smt3B)	SUMO2 SMT3B SMT3H2	Homo sapiens (Human)	95
P57740	P57740	NU107_HUMAN	reviewed	Nuclear pore complex protein Nup107 (107 kDa nucleoporin) (Nucleoporin Nup107)	NUP107	Homo sapiens (Human)	925
P62081	P62081	RS7_HUMAN	reviewed	40S ribosomal protein S7 (Small ribosomal subunit protein eS7)	RPS7	Homo sapiens (Human)	194
P62258	P62258	1433E_HUMAN	reviewed	14-3-3 protein epsilon (14-3-3E)	YWHAE	Homo sapiens (Human)	255
P62304	P62304	RUXE_HUMAN	reviewed	Small nuclear ribonucleoprotein E (snRNP-E) (Sm protein E) (Sm-E) (SmE)	SNRPE	Homo sapiens (Human)	92
P78312	P78312	F193A_HUMAN	reviewed	Protein FAM193A (Protein IT14)	FAM193A C4orf8 RES4-22	Homo sapiens (Human)	1265
P98175	P98175	RBM10_HUMAN	reviewed	RNA-binding protein 10 (G patch domain-containing protein 9) (RNA-binding motif protein 10) (RNA-binding protein S1-1) (S1-1)	RBM10 DXS8237E GPATC9 GPATCH9 KIAA0122	Homo sapiens (Human)	930
Q01973	Q01973	ROR1_HUMAN	reviewed	Inactive tyrosine-protein kinase transmembrane receptor ROR1 (Neurotrophic tyrosine kinase, receptor-related 1)	ROR1 NTRKR1	Homo sapiens (Human)	937
Q01974	Q01974	ROR2_HUMAN	reviewed	Tyrosine-protein kinase transmembrane receptor ROR2 (EC 2.7.10.1) (Neurotrophic tyrosine kinase, receptor-related 2)	ROR2 NTRKR2	Homo sapiens (Human)	943
Q07157	Q07157	ZO1_HUMAN	reviewed	Tight junction protein ZO-1 (Tight junction protein 1) (Zona occludens protein 1) (Zonula occludens protein 1)	TJP1 ZO1	Homo sapiens (Human)	1748
Q07666	Q07666	KHDR1_HUMAN	reviewed	KH domain-containing, RNA-binding, signal transduction-associated protein 1 (GAP-associated tyrosine phosphoprotein p62) (Src-associated in mitosis 68 kDa protein) (Sam68) (p21 Ras GTPase-activating protein-associated p62) (p68)	KHDRBS1 SAM68	Homo sapiens (Human)	443
Q08379	Q08379	GOGA2_HUMAN	reviewed	Golgin subfamily A member 2 (130 kDa cis-Golgi matrix protein) (GM130) (GM130 autoantigen) (Golgin-95)	GOLGA2	Homo sapiens (Human)	1002
Q12923	Q12923	PTN13_HUMAN	reviewed	Tyrosine-protein phosphatase non-receptor type 13 (EC 3.1.3.48) (Fas-associated protein-tyrosine phosphatase 1) (FAP-1) (PTP-BAS) (Protein-tyrosine phosphatase 1E) (PTP-E1) (hPTPE1) (Protein-tyrosine phosphatase PTPL1)	PTPN13 PNP1 PTP1E PTPL1	Homo sapiens (Human)	2485
Q12955	Q12955	ANK3_HUMAN	reviewed	Ankyrin-3 (ANK-3) (Ankyrin-G)	ANK3	Homo sapiens (Human)	4377
Q12986	Q12986	NFX1_HUMAN	reviewed	Transcriptional repressor NF-X1 (EC 2.3.2.-) (Nuclear transcription factor, X box-binding protein 1)	NFX1 NFX2	Homo sapiens (Human)	1120
Q13162	Q13162	PRDX4_HUMAN	reviewed	Peroxiredoxin-4 (EC 1.11.1.15) (Antioxidant enzyme AOE372) (AOE37-2) (Peroxiredoxin IV) (Prx-IV) (Thioredoxin peroxidase AO372) (Thioredoxin-dependent peroxide reductase A0372)	PRDX4	Homo sapiens (Human)	271
Q13283	Q13283	G3BP1_HUMAN	reviewed	Ras GTPase-activating protein-binding protein 1 (G3BP-1) (EC 3.6.4.12) (EC 3.6.4.13) (ATP-dependent DNA helicase VIII) (hDH VIII) (GAP SH3 domain-binding protein 1)	G3BP1 G3BP	Homo sapiens (Human)	466
Q13370	Q13370	PDE3B_HUMAN	reviewed	cGMP-inhibited 3',5'-cyclic phosphodiesterase B (EC 3.1.4.17) (CGIPDE1) (CGIP1) (Cyclic GMP-inhibited phosphodiesterase B) (CGI-PDE B)	PDE3B	Homo sapiens (Human)	1112
Q13492	Q13492	PICAL_HUMAN	reviewed	Phosphatidylinositol-binding clathrin assembly protein (Clathrin assembly lymphoid myeloid leukemia protein)	PICALM CALM	Homo sapiens (Human)	652
Q13501	Q13501	SQSTM_HUMAN	reviewed	Sequestosome-1 (EBI3-associated protein of 60 kDa) (EBIAP) (p60) (Phosphotyrosine-independent ligand for the Lck SH2 domain of 62 kDa) (Ubiquitin-binding protein p62)	SQSTM1 ORCA OSIL	Homo sapiens (Human)	440
Q13625	Q13625	ASPP2_HUMAN	reviewed	Apoptosis-stimulating of p53 protein 2 (Bcl2-binding protein) (Bbp) (Renal carcinoma antigen NY-REN-51) (Tumor suppressor p53-binding protein 2) (53BP2) (p53-binding protein 2) (p53BP2)	TP53BP2 ASPP2 BBP	Homo sapiens (Human)	1128
Q14008	Q14008	CKAP5_HUMAN	reviewed	Cytoskeleton-associated protein 5 (Colonic and hepatic tumor overexpressed gene protein) (Ch-TOG)	CKAP5 KIAA0097	Homo sapiens (Human)	2032
Q14160	Q14160	SCRIB_HUMAN	reviewed	Protein scribble homolog (Scribble) (hScrib) (Protein LAP4)	SCRIB CRIB1 KIAA0147 LAP4 SCRB1 VARTUL	Homo sapiens (Human)	1630
Q14596	Q14596	NBR1_HUMAN	reviewed	Next to BRCA1 gene 1 protein (Cell migration-inducing gene 19 protein) (Membrane component chromosome 17 surface marker 2) (Neighbor of BRCA1 gene 1 protein) (Protein 1A1-3B)	NBR1 1A13B KIAA0049 M17S2 MIG19	Homo sapiens (Human)	966
Q14739	Q14739	LBR_HUMAN	reviewed	Delta(14)-sterol reductase LBR (Delta-14-SR) (EC 1.3.1.70) (3-beta-hydroxysterol Delta (14)-reductase) (C-14 sterol reductase) (C14SR) (Integral nuclear envelope inner membrane protein) (LMN2R) (Lamin-B receptor) (Sterol C14-reductase)	LBR	Homo sapiens (Human)	615
Q14789	Q14789	GOGB1_HUMAN	reviewed	Golgin subfamily B member 1 (372 kDa Golgi complex-associated protein) (GCP372) (Giantin) (Macrogolgin)	GOLGB1	Homo sapiens (Human)	3259
Q14966	Q14966	ZN638_HUMAN	reviewed	Zinc finger protein 638 (Cutaneous T-cell lymphoma-associated antigen se33-1) (CTCL-associated antigen se33-1) (Nuclear protein 220) (Zinc finger matrin-like protein)	ZNF638 NP220 ZFML	Homo sapiens (Human)	1978
Q14C86	Q14C86	GAPD1_HUMAN	reviewed	GTPase-activating protein and VPS9 domain-containing protein 1 (GAPex-5) (Rab5-activating protein 6)	GAPVD1 GAPEX5 KIAA1521 RAP6	Homo sapiens (Human)	1478
Q15032	Q15032	R3HD1_HUMAN	reviewed	R3H domain-containing protein 1	R3HDM1 KIAA0029 R3HDM	Homo sapiens (Human)	1099
Q15084	Q15084	PDIA6_HUMAN	reviewed	Protein disulfide-isomerase A6 (EC 5.3.4.1) (Endoplasmic reticulum protein 5) (ER protein 5) (ERp5) (Protein disulfide isomerase P5) (Thioredoxin domain-containing protein 7)	PDIA6 ERP5 P5 TXNDC7	Homo sapiens (Human)	440
Q15208	Q15208	STK38_HUMAN	reviewed	Serine/threonine-protein kinase 38 (EC 2.7.11.1) (NDR1 protein kinase) (Nuclear Dbf2-related kinase 1)	STK38 NDR1	Homo sapiens (Human)	465
Q15643	Q15643	TRIPB_HUMAN	reviewed	Thyroid receptor-interacting protein 11 (TR-interacting protein 11) (TRIP-11) (Clonal evolution-related gene on chromosome 14 protein) (Golgi-associated microtubule-binding protein 210) (GMAP-210) (Trip230)	TRIP11 CEV14	Homo sapiens (Human)	1979
Q15652	Q15652	JHD2C_HUMAN	reviewed	Probable JmjC domain-containing histone demethylation protein 2C (EC 1.14.11.-) (Jumonji domain-containing protein 1C) (Thyroid receptor-interacting protein 8) (TR-interacting protein 8) (TRIP-8)	JMJD1C JHDM2C KIAA1380 TRIP8	Homo sapiens (Human)	2540
Q15654	Q15654	TRIP6_HUMAN	reviewed	Thyroid receptor-interacting protein 6 (TR-interacting protein 6) (TRIP-6) (Opa-interacting protein 1) (OIP-1) (Zyxin-related protein 1) (ZRP-1)	TRIP6 OIP1	Homo sapiens (Human)	476
Q15678	Q15678	PTN14_HUMAN	reviewed	Tyrosine-protein phosphatase non-receptor type 14 (EC 3.1.3.48) (Protein-tyrosine phosphatase pez)	PTPN14 PEZ PTPD2	Homo sapiens (Human)	1187
Q15811	Q15811	ITSN1_HUMAN	reviewed	Intersectin-1 (SH3 domain-containing protein 1A) (SH3P17)	ITSN1 ITSN SH3D1A	Homo sapiens (Human)	1721
Q16625	Q16625	OCLN_HUMAN	reviewed	Occludin	OCLN	Homo sapiens (Human)	522
Q17RY0	Q17RY0	CPEB4_HUMAN	reviewed	Cytoplasmic polyadenylation element-binding protein 4 (CPE-BP4) (CPE-binding protein 4) (hCPEB-4)	CPEB4 KIAA1673	Homo sapiens (Human)	729
Q3V6T2	Q3V6T2	GRDN_HUMAN	reviewed	Girdin (Akt phosphorylation enhancer) (APE) (Coiled-coil domain-containing protein 88A) (G alpha-interacting vesicle-associated protein) (GIV) (Girders of actin filament) (Hook-related protein 1) (HkRP1)	CCDC88A APE GRDN KIAA1212	Homo sapiens (Human)	1871
Q3YEC7	Q3YEC7	RABL6_HUMAN	reviewed	Rab-like protein 6 (GTP-binding protein Parf) (Partner of ARF) (Rab-like protein 1) (RBEL1)	RABL6 C9orf86 PARF	Homo sapiens (Human)	729
Q4VCS5	Q4VCS5	AMOT_HUMAN	reviewed	Angiomotin	AMOT KIAA1071	Homo sapiens (Human)	1084
Q53EZ4	Q53EZ4	CEP55_HUMAN	reviewed	Centrosomal protein of 55 kDa (Cep55) (Up-regulated in colon cancer 6)	CEP55 C10orf3 URCC6	Homo sapiens (Human)	464
Q5HYI8	Q5HYI8	RABL3_HUMAN	reviewed	Rab-like protein 3	RABL3	Homo sapiens (Human)	236
Q5JRA6	Q5JRA6	TGO1_HUMAN	reviewed	Transport and Golgi organization protein 1 homolog (TANGO1) (C219-reactive peptide) (D320) (Melanoma inhibitory activity protein 3)	MIA3 KIAA0268 TANGO UNQ6077/PRO20088	Homo sapiens (Human)	1907
Q5JSZ5	Q5JSZ5	PRC2B_HUMAN	reviewed	Protein PRRC2B (HLA-B-associated transcript 2-like 1) (Proline-rich coiled-coil protein 2B)	PRRC2B BAT2L BAT2L1 KIAA0515	Homo sapiens (Human)	2229
Q5JTV8	Q5JTV8	TOIP1_HUMAN	reviewed	Torsin-1A-interacting protein 1 (Lamin-associated protein 1B) (LAP1B)	TOR1AIP1 LAP1	Homo sapiens (Human)	583
Q5SNT2	Q5SNT2	TM201_HUMAN	reviewed	Transmembrane protein 201 (Spindle-associated membrane protein 1)	TMEM201 NET5 SAMP1	Homo sapiens (Human)	666
Q5T0W9	Q5T0W9	FA83B_HUMAN	reviewed	Protein FAM83B	FAM83B C6orf143	Homo sapiens (Human)	1011
Q5T0Z8	Q5T0Z8	CF132_HUMAN	reviewed	Uncharacterized protein C6orf132	C6orf132	Homo sapiens (Human)	1188
Q5T5P2	Q5T5P2	SKT_HUMAN	reviewed	Sickle tail protein homolog	KIAA1217 SKT	Homo sapiens (Human)	1943
Q5T5U3	Q5T5U3	RHG21_HUMAN	reviewed	Rho GTPase-activating protein 21 (Rho GTPase-activating protein 10) (Rho-type GTPase-activating protein 21)	ARHGAP21 ARHGAP10 KIAA1424	Homo sapiens (Human)	1958
Q5T5Y3	Q5T5Y3	CAMP1_HUMAN	reviewed	Calmodulin-regulated spectrin-associated protein 1	CAMSAP1	Homo sapiens (Human)	1602
Q5VUA4	Q5VUA4	ZN318_HUMAN	reviewed	Zinc finger protein 318 (Endocrine regulatory protein)	ZNF318 HRIHFB2436	Homo sapiens (Human)	2279
Q5VV42	Q5VV42	CDKAL_HUMAN	reviewed	Threonylcarbamoyladenosine tRNA methylthiotransferase (EC 2.8.4.5) (CDK5 regulatory subunit-associated protein 1-like 1) (tRNA-t(6)A37 methylthiotransferase)	CDKAL1	Homo sapiens (Human)	579
Q68DQ2	Q68DQ2	CRBG3_HUMAN	reviewed	Very large A-kinase anchor protein (vlAKAP) (Beta/gamma crystallin domain-containing protein 3)	CRYBG3	Homo sapiens (Human)	2970
Q68DV7	Q68DV7	RNF43_HUMAN	reviewed	E3 ubiquitin-protein ligase RNF43 (EC 2.3.2.27) (RING finger protein 43) (RING-type E3 ubiquitin transferase RNF43)	RNF43	Homo sapiens (Human)	783
Q6IQ23	Q6IQ23	PKHA7_HUMAN	reviewed	Pleckstrin homology domain-containing family A member 7 (PH domain-containing family A member 7)	PLEKHA7	Homo sapiens (Human)	1121
Q6NSI4	Q6NSI4	RADX_HUMAN	reviewed	RPA-related protein RADX (RPA-related and RAD51-antagonist, X-chromosome)	RADX CXorf57	Homo sapiens (Human)	855
Q6NZ36	Q6NZ36	FAP20_HUMAN	reviewed	Fanconi anemia core complex-associated protein 20 (FANCA-associated protein of 20 kDa) (Fanconi anemia-associated protein of 20 kDa)	FAAP20 C1orf86 FP7162	Homo sapiens (Human)	180
Q6P0N0	Q6P0N0	M18BP_HUMAN	reviewed	Mis18-binding protein 1 (Kinetochore-associated protein KNL-2 homolog) (HsKNL-2) (P243)	MIS18BP1 C14orf106 KIAA1903 KNL2 M18BP1	Homo sapiens (Human)	1132
Q6P995	Q6P995	F171B_HUMAN	reviewed	Protein FAM171B	FAM171B KIAA1946 NPD019	Homo sapiens (Human)	826
Q6T4R5	Q6T4R5	NHS_HUMAN	reviewed	Nance-Horan syndrome protein (Congenital cataracts and dental anomalies protein)	NHS	Homo sapiens (Human)	1651
Q6UN15	Q6UN15	FIP1_HUMAN	reviewed	Pre-mRNA 3'-end-processing factor FIP1 (hFip1) (FIP1-like 1 protein) (Factor interacting with PAP) (Rearranged in hypereosinophilia)	FIP1L1 FIP1 RHE	Homo sapiens (Human)	594
Q6XZF7	Q6XZF7	DNMBP_HUMAN	reviewed	Dynamin-binding protein (Scaffold protein Tuba)	DNMBP ARHGEF36 KIAA1010 TUBA	Homo sapiens (Human)	1577
Q6Y7W6	Q6Y7W6	GGYF2_HUMAN	reviewed	GRB10-interacting GYF protein 2 (PERQ amino acid-rich with GYF domain-containing protein 2) (Trinucleotide repeat-containing gene 15 protein)	GIGYF2 KIAA0642 PERQ2 TNRC15	Homo sapiens (Human)	1299
Q70EL1	Q70EL1	UBP54_HUMAN	reviewed	Inactive ubiquitin carboxyl-terminal hydrolase 54 (Inactive ubiquitin-specific peptidase 54)	USP54 C10orf29	Homo sapiens (Human)	1684
Q76G19	Q76G19	PDZD4_HUMAN	reviewed	PDZ domain-containing protein 4 (PDZ domain-containing RING finger protein 4-like protein)	PDZD4 KIAA1444 PDZK4 PDZRN4L	Homo sapiens (Human)	769
Q7Z2W4	Q7Z2W4	ZCCHV_HUMAN	reviewed	Zinc finger CCCH-type antiviral protein 1 (ADP-ribosyltransferase diphtheria toxin-like 13) (ARTD13) (Inactive Poly [ADP-ribose] polymerase 13) (PARP13) (Zinc finger CCCH domain-containing protein 2) (Zinc finger antiviral protein) (ZAP)	ZC3HAV1 ZC3HDC2 PRO1677	Homo sapiens (Human)	902
Q7Z3T8	Q7Z3T8	ZFY16_HUMAN	reviewed	Zinc finger FYVE domain-containing protein 16 (Endofin) (Endosome-associated FYVE domain protein)	ZFYVE16 KIAA0305	Homo sapiens (Human)	1539
Q7Z417	Q7Z417	NUFP2_HUMAN	reviewed	Nuclear fragile X mental retardation-interacting protein 2 (82 kDa FMRP-interacting protein) (82-FIP) (Cell proliferation-inducing gene 1 protein) (FMRP-interacting protein 2)	NUFIP2 KIAA1321 PIG1	Homo sapiens (Human)	695
Q7Z4H7	Q7Z4H7	HAUS6_HUMAN	reviewed	HAUS augmin-like complex subunit 6	HAUS6 DGT6 FAM29A KIAA1574	Homo sapiens (Human)	955
Q7Z6J0	Q7Z6J0	SH3R1_HUMAN	reviewed	E3 ubiquitin-protein ligase SH3RF1 (EC 2.3.2.27) (Plenty of SH3s) (Protein POSH) (RING finger protein 142) (RING-type E3 ubiquitin transferase SH3RF1) (SH3 domain-containing RING finger protein 1) (SH3 multiple domains protein 2)	SH3RF1 KIAA1494 POSH POSH1 RNF142 SH3MD2	Homo sapiens (Human)	888
Q7Z7G8	Q7Z7G8	VP13B_HUMAN	reviewed	Vacuolar protein sorting-associated protein 13B (Cohen syndrome protein 1)	VPS13B CHS1 COH1 KIAA0532	Homo sapiens (Human)	4022
Q86UE4	Q86UE4	LYRIC_HUMAN	reviewed	Protein LYRIC (3D3/LYRIC) (Astrocyte elevated gene-1 protein) (AEG-1) (Lysine-rich CEACAM1 co-isolated protein) (Metadherin) (Metastasis adhesion protein)	MTDH AEG1 LYRIC	Homo sapiens (Human)	582
Q86XL3	Q86XL3	ANKL2_HUMAN	reviewed	Ankyrin repeat and LEM domain-containing protein 2 (LEM domain-containing protein 4)	ANKLE2 KIAA0692 LEM4	Homo sapiens (Human)	938
Q8IVF2	Q8IVF2	AHNK2_HUMAN	reviewed	Protein AHNAK2	AHNAK2 C14orf78 KIAA2019	Homo sapiens (Human)	5795
Q8IWC1	Q8IWC1	MA7D3_HUMAN	reviewed	MAP7 domain-containing protein 3	MAP7D3 MDP3	Homo sapiens (Human)	876
Q8IZH2	Q8IZH2	XRN1_HUMAN	reviewed	5'-3' exoribonuclease 1 (EC 3.1.13.-) (Strand-exchange protein 1 homolog)	XRN1 SEP1	Homo sapiens (Human)	1706
Q8N3J3	Q8N3J3	CQ053_HUMAN	reviewed	Uncharacterized protein C17orf53	C17orf53	Homo sapiens (Human)	647
Q8N5C8	Q8N5C8	TAB3_HUMAN	reviewed	TGF-beta-activated kinase 1 and MAP3K7-binding protein 3 (Mitogen-activated protein kinase kinase kinase 7-interacting protein 3) (NF-kappa-B-activating protein 1) (TAK1-binding protein 3) (TAB-3) (TGF-beta-activated kinase 1-binding protein 3)	TAB3 MAP3K7IP3	Homo sapiens (Human)	712
Q8N5G2	Q8N5G2	MACOI_HUMAN	reviewed	Macoilin (Macoilin-1) (Transmembrane protein 57)	MACO1 TMEM57	Homo sapiens (Human)	664
Q8N6T3	Q8N6T3	ARFG1_HUMAN	reviewed	ADP-ribosylation factor GTPase-activating protein 1 (ARF GAP 1) (ADP-ribosylation factor 1 GTPase-activating protein) (ARF1 GAP) (ARF1-directed GTPase-activating protein)	ARFGAP1 ARF1GAP	Homo sapiens (Human)	406
Q8NDI1	Q8NDI1	EHBP1_HUMAN	reviewed	EH domain-binding protein 1	EHBP1 KIAA0903 NACSIN	Homo sapiens (Human)	1231
Q8NDV7	Q8NDV7	TNR6A_HUMAN	reviewed	Trinucleotide repeat-containing gene 6A protein (CAG repeat protein 26) (EMSY interactor protein) (GW182 autoantigen) (Protein GW1) (Glycine-tryptophan protein of 182 kDa)	TNRC6A CAGH26 KIAA1460 TNRC6	Homo sapiens (Human)	1962
Q8NEV8	Q8NEV8	EXPH5_HUMAN	reviewed	Exophilin-5 (Synaptotagmin-like protein homolog lacking C2 domains b) (SlaC2-b) (Slp homolog lacking C2 domains b)	EXPH5 KIAA0624 SLAC2B	Homo sapiens (Human)	1989
Q8NHV4	Q8NHV4	NEDD1_HUMAN	reviewed	Protein NEDD1 (Neural precursor cell expressed developmentally down-regulated protein 1) (NEDD-1)	NEDD1	Homo sapiens (Human)	660
Q8TAA9	Q8TAA9	VANG1_HUMAN	reviewed	Vang-like protein 1 (Loop-tail protein 2 homolog) (LPP2) (Strabismus 2) (Van Gogh-like protein 1)	VANGL1 STB2	Homo sapiens (Human)	524
Q8TBA6	Q8TBA6	GOGA5_HUMAN	reviewed	Golgin subfamily A member 5 (Cell proliferation-inducing gene 31 protein) (Golgin-84) (Protein Ret-II) (RET-fused gene 5 protein)	GOLGA5 RETII RFG5 PIG31	Homo sapiens (Human)	731
Q8TCU4	Q8TCU4	ALMS1_HUMAN	reviewed	Alstrom syndrome protein 1	ALMS1 KIAA0328	Homo sapiens (Human)	4168
Q8TDM6	Q8TDM6	DLG5_HUMAN	reviewed	Disks large homolog 5 (Discs large protein P-dlg) (Placenta and prostate DLG)	DLG5 KIAA0583 PDLG	Homo sapiens (Human)	1919
Q8TEW0	Q8TEW0	PARD3_HUMAN	reviewed	Partitioning defective 3 homolog (PAR-3) (PARD-3) (Atypical PKC isotype-specific-interacting protein) (ASIP) (CTCL tumor antigen se2-5) (PAR3-alpha)	PARD3 PAR3 PAR3A	Homo sapiens (Human)	1356
Q8WU20	Q8WU20	FRS2_HUMAN	reviewed	Fibroblast growth factor receptor substrate 2 (FGFR substrate 2) (FGFR-signaling adaptor SNT) (Suc1-associated neurotrophic factor target 1) (SNT-1)	FRS2	Homo sapiens (Human)	508
Q8WUM0	Q8WUM0	NU133_HUMAN	reviewed	Nuclear pore complex protein Nup133 (133 kDa nucleoporin) (Nucleoporin Nup133)	NUP133	Homo sapiens (Human)	1156
Q8WXE0	Q8WXE0	CSKI2_HUMAN	reviewed	Caskin-2 (CASK-interacting protein 2)	CASKIN2 KIAA1139	Homo sapiens (Human)	1202
Q8WYP5	Q8WYP5	ELYS_HUMAN	reviewed	Protein ELYS (Embryonic large molecule derived from yolk sac) (Protein MEL-28) (Putative AT-hook-containing transcription factor 1)	AHCTF1 ELYS TMBS62 MSTP108	Homo sapiens (Human)	2266
Q8WZ42	Q8WZ42	TITIN_HUMAN	reviewed	Titin (EC 2.7.11.1) (Connectin) (Rhabdomyosarcoma antigen MU-RMS-40.14)	TTN	Homo sapiens (Human)	34350
Q92540	Q92540	SMG7_HUMAN	reviewed	Protein SMG7 (EST1-like protein C) (SMG-7 homolog) (hSMG-7)	SMG7 C1orf16 EST1C KIAA0250	Homo sapiens (Human)	1137
Q92545	Q92545	TM131_HUMAN	reviewed	Transmembrane protein 131 (Protein RW1)	TMEM131 KIAA0257 RW1	Homo sapiens (Human)	1883
Q92575	Q92575	UBXN4_HUMAN	reviewed	UBX domain-containing protein 4 (Erasin) (UBX domain-containing protein 2)	UBXN4 KIAA0242 UBXD2 UBXDC1	Homo sapiens (Human)	508
Q92616	Q92616	GCN1_HUMAN	reviewed	eIF-2-alpha kinase activator GCN1 (GCN1 eIF-2-alpha kinase activator homolog) (GCN1-like protein 1) (General control of amino-acid synthesis 1-like protein 1) (Translational activator GCN1) (HsGCN1)	GCN1 GCN1L1 KIAA0219	Homo sapiens (Human)	2671
Q92625	Q92625	ANS1A_HUMAN	reviewed	Ankyrin repeat and SAM domain-containing protein 1A (Odin)	ANKS1A ANKS1 KIAA0229 ODIN	Homo sapiens (Human)	1134
Q92738	Q92738	US6NL_HUMAN	reviewed	USP6 N-terminal-like protein (Related to the N-terminus of tre) (RN-tre)	USP6NL KIAA0019	Homo sapiens (Human)	828
Q92783	Q92783	STAM1_HUMAN	reviewed	Signal transducing adapter molecule 1 (STAM-1)	STAM STAM1	Homo sapiens (Human)	540
Q92890	Q92890	UFD1_HUMAN	reviewed	Ubiquitin recognition factor in ER-associated degradation protein 1 (Ubiquitin fusion degradation protein 1) (UB fusion protein 1)	UFD1 UFD1L	Homo sapiens (Human)	307
Q92953	Q92953	KCNB2_HUMAN	reviewed	Potassium voltage-gated channel subfamily B member 2 (Voltage-gated potassium channel subunit Kv2.2)	KCNB2	Homo sapiens (Human)	911
Q92997	Q92997	DVL3_HUMAN	reviewed	Segment polarity protein dishevelled homolog DVL-3 (Dishevelled-3) (DSH homolog 3)	DVL3 KIAA0208	Homo sapiens (Human)	716
Q93052	Q93052	LPP_HUMAN	reviewed	Lipoma-preferred partner (LIM domain-containing preferred translocation partner in lipoma)	LPP	Homo sapiens (Human)	612
Q969F2	Q969F2	NKD2_HUMAN	reviewed	Protein naked cuticle homolog 2 (Naked-2) (hNkd2)	NKD2	Homo sapiens (Human)	451
Q96A49	Q96A49	SYAP1_HUMAN	reviewed	Synapse-associated protein 1 (BSD domain-containing signal transducer and Akt interactor protein) (BSTA)	SYAP1 PRO3113	Homo sapiens (Human)	352
Q96A65	Q96A65	EXOC4_HUMAN	reviewed	Exocyst complex component 4 (Exocyst complex component Sec8)	EXOC4 KIAA1699 SEC8 SEC8L1	Homo sapiens (Human)	974
Q96AY4	Q96AY4	TTC28_HUMAN	reviewed	Tetratricopeptide repeat protein 28 (TPR repeat protein 28) (TPR repeat-containing big gene cloned at Keio)	TTC28 KIAA1043 TPRBK	Homo sapiens (Human)	2481
Q96DN5	Q96DN5	TBC31_HUMAN	reviewed	TBC1 domain family member 31 (WD repeat-containing protein 67)	TBC1D31 WDR67	Homo sapiens (Human)	1066
Q96EV2	Q96EV2	RBM33_HUMAN	reviewed	RNA-binding protein 33 (Proline-rich protein 8) (RNA-binding motif protein 33)	RBM33 PRR8	Homo sapiens (Human)	1170
Q96HA1	Q96HA1	P121A_HUMAN	reviewed	Nuclear envelope pore membrane protein POM 121 (Nuclear envelope pore membrane protein POM 121A) (Nucleoporin Nup121) (Pore membrane protein of 121 kDa)	POM121 KIAA0618 NUP121 POM121A	Homo sapiens (Human)	1249
Q96I24	Q96I24	FUBP3_HUMAN	reviewed	Far upstream element-binding protein 3 (FUSE-binding protein 3)	FUBP3 FBP3	Homo sapiens (Human)	572
Q96J84	Q96J84	KIRR1_HUMAN	reviewed	Kin of IRRE-like protein 1 (Kin of irregular chiasm-like protein 1) (Nephrin-like protein 1)	KIRREL1 KIRREL NEPH1	Homo sapiens (Human)	757
Q96JH7	Q96JH7	VCIP1_HUMAN	reviewed	Deubiquitinating protein VCIP135 (EC 3.4.19.12) (Valosin-containing protein p97/p47 complex-interacting protein 1) (Valosin-containing protein p97/p47 complex-interacting protein p135) (VCP/p47 complex-interacting 135-kDa protein)	VCPIP1 KIAA1850 VCIP135	Homo sapiens (Human)	1222
Q96KG9	Q96KG9	SCYL1_HUMAN	reviewed	N-terminal kinase-like protein (Coated vesicle-associated kinase of 90 kDa) (SCY1-like protein 1) (Telomerase regulation-associated protein) (Telomerase transcriptional element-interacting factor) (Teratoma-associated tyrosine kinase)	SCYL1 CVAK90 GKLP NTKL TAPK TEIF TRAP HT019	Homo sapiens (Human)	808
Q96KQ4	Q96KQ4	ASPP1_HUMAN	reviewed	Apoptosis-stimulating of p53 protein 1 (Protein phosphatase 1 regulatory subunit 13B)	PPP1R13B ASPP1 KIAA0771	Homo sapiens (Human)	1090
Q96NW7	Q96NW7	LRRC7_HUMAN	reviewed	Leucine-rich repeat-containing protein 7 (Densin-180) (Densin) (Protein LAP1)	LRRC7 KIAA1365 LAP1	Homo sapiens (Human)	1537
Q96PK6	Q96PK6	RBM14_HUMAN	reviewed	RNA-binding protein 14 (Paraspeckle protein 2) (PSP2) (RNA-binding motif protein 14) (RRM-containing coactivator activator/modulator) (Synaptotagmin-interacting protein) (SYT-interacting protein)	RBM14 SIP	Homo sapiens (Human)	669
Q96PV6	Q96PV6	LENG8_HUMAN	reviewed	Leukocyte receptor cluster member 8	LENG8 KIAA1932	Homo sapiens (Human)	800
Q96RT1	Q96RT1	ERBIN_HUMAN	reviewed	Erbin (Densin-180-like protein) (Erbb2-interacting protein) (Protein LAP2)	ERBIN ERBB2IP KIAA1225 LAP2	Homo sapiens (Human)	1412
Q96SK2	Q96SK2	TM209_HUMAN	reviewed	Transmembrane protein 209	TMEM209	Homo sapiens (Human)	561
Q96T21	Q96T21	SEBP2_HUMAN	reviewed	Selenocysteine insertion sequence-binding protein 2 (SECIS-binding protein 2)	SECISBP2 SBP2	Homo sapiens (Human)	854
Q99618	Q99618	CDCA3_HUMAN	reviewed	Cell division cycle-associated protein 3 (Gene-rich cluster protein C8) (Trigger of mitotic entry protein 1) (TOME-1)	CDCA3 C8 GRCC8 TOME1	Homo sapiens (Human)	268
Q99700	Q99700	ATX2_HUMAN	reviewed	Ataxin-2 (Spinocerebellar ataxia type 2 protein) (Trinucleotide repeat-containing gene 13 protein)	ATXN2 ATX2 SCA2 TNRC13	Homo sapiens (Human)	1313
Q99733	Q99733	NP1L4_HUMAN	reviewed	Nucleosome assembly protein 1-like 4 (Nucleosome assembly protein 2) (NAP-2)	NAP1L4 NAP2	Homo sapiens (Human)	375
Q99767	Q99767	APBA2_HUMAN	reviewed	Amyloid-beta A4 precursor protein-binding family A member 2 (Adapter protein X11beta) (Neuron-specific X11L protein) (Neuronal Munc18-1-interacting protein 2) (Mint-2)	APBA2 MINT2 X11L	Homo sapiens (Human)	749
Q99963	Q99963	SH3G3_HUMAN	reviewed	Endophilin-A3 (EEN-B2) (Endophilin-3) (SH3 domain protein 2C) (SH3 domain-containing GRB2-like protein 3)	SH3GL3 CNSA3 SH3D2C	Homo sapiens (Human)	347
Q99961	Q99961	SH3G1_HUMAN	reviewed	Endophilin-A2 (EEN fusion partner of MLL) (Endophilin-2) (Extra eleven-nineteen leukemia fusion gene protein) (EEN) (SH3 domain protein 2B) (SH3 domain-containing GRB2-like protein 1)	SH3GL1 CNSA1 SH3D2B	Homo sapiens (Human)	368
Q9BR77	Q9BR77	CCD77_HUMAN	reviewed	Coiled-coil domain-containing protein 77	CCDC77	Homo sapiens (Human)	488
Q9BRK4	Q9BRK4	LZTS2_HUMAN	reviewed	Leucine zipper putative tumor suppressor 2 (hLZTS2) (Protein LAPSER1)	LZTS2 KIAA1813 LAPSER1	Homo sapiens (Human)	669
Q9BSJ8	Q9BSJ8	ESYT1_HUMAN	reviewed	Extended synaptotagmin-1 (E-Syt1) (Membrane-bound C2 domain-containing protein)	ESYT1 FAM62A KIAA0747 MBC2	Homo sapiens (Human)	1104
Q9BTX1	Q9BTX1	NDC1_HUMAN	reviewed	Nucleoporin NDC1 (hNDC1) (Transmembrane protein 48)	NDC1 TMEM48	Homo sapiens (Human)	674
Q9BV40	Q9BV40	VAMP8_HUMAN	reviewed	Vesicle-associated membrane protein 8 (VAMP-8) (Endobrevin) (EDB)	VAMP8	Homo sapiens (Human)	100
Q9BXF6	Q9BXF6	RFIP5_HUMAN	reviewed	Rab11 family-interacting protein 5 (Rab11-FIP5) (Gamma-SNAP-associated factor 1) (Gaf-1) (Phosphoprotein pp75) (Rab11-interacting protein Rip11)	RAB11FIP5 GAF1 KIAA0857 RIP11	Homo sapiens (Human)	653
Q9BY89	Q9BY89	K1671_HUMAN	reviewed	Uncharacterized protein KIAA1671	KIAA1671	Homo sapiens (Human)	1806
Q9C026	Q9C026	TRIM9_HUMAN	reviewed	E3 ubiquitin-protein ligase TRIM9 (EC 2.3.2.27) (RING finger protein 91) (RING-type E3 ubiquitin transferase TRIM9) (Tripartite motif-containing protein 9)	TRIM9 KIAA0282 RNF91	Homo sapiens (Human)	710
Q9C0B5	Q9C0B5	ZDHC5_HUMAN	reviewed	Palmitoyltransferase ZDHHC5 (EC 2.3.1.225) (Zinc finger DHHC domain-containing protein 5) (DHHC-5) (Zinc finger protein 375)	ZDHHC5 KIAA1748 ZNF375	Homo sapiens (Human)	715
Q9C0C9	Q9C0C9	UBE2O_HUMAN	reviewed	(E3-independent) E2 ubiquitin-conjugating enzyme (EC 2.3.2.24) (E2/E3 hybrid ubiquitin-protein ligase UBE2O) (Ubiquitin carrier protein O) (Ubiquitin-conjugating enzyme E2 O) (Ubiquitin-conjugating enzyme E2 of 230 kDa) (Ubiquitin-conjugating enzyme E2-230K) (Ubiquitin-protein ligase O)	UBE2O KIAA1734	Homo sapiens (Human)	1292
Q9C0D5	Q9C0D5	TANC1_HUMAN	reviewed	Protein TANC1 (Tetratricopeptide repeat, ankyrin repeat and coiled-coil domain-containing protein 1)	TANC1 KIAA1728	Homo sapiens (Human)	1861
Q9H307	Q9H307	PININ_HUMAN	reviewed	Pinin (140 kDa nuclear and cell adhesion-related phosphoprotein) (Desmosome-associated protein) (Domain-rich serine protein) (DRS protein) (DRSP) (Melanoma metastasis clone A protein) (Nuclear protein SDK3) (SR-like protein)	PNN DRS MEMA	Homo sapiens (Human)	717
Q9H329	Q9H329	E41LB_HUMAN	reviewed	Band 4.1-like protein 4B (FERM-containing protein CG1) (Protein EHM2)	EPB41L4B EHM2 LULU2	Homo sapiens (Human)	900
Q9H3P7	Q9H3P7	GCP60_HUMAN	reviewed	Golgi resident protein GCP60 (Acyl-CoA-binding domain-containing protein 3) (Golgi complex-associated protein 1) (GOCAP1) (Golgi phosphoprotein 1) (GOLPH1) (PBR- and PKA-associated protein 7) (Peripheral benzodiazepine receptor-associated protein PAP7) [Cleaved into: Golgi resident protein GCP60, N-terminally processed]	ACBD3 GCP60 GOCAP1 GOLPH1	Homo sapiens (Human)	528
Q9H3U1	Q9H3U1	UN45A_HUMAN	reviewed	Protein unc-45 homolog A (Unc-45A) (GCUNC-45) (Smooth muscle cell-associated protein 1) (SMAP-1)	UNC45A SMAP1	Homo sapiens (Human)	944
Q9H6J7	Q9H6J7	CK049_HUMAN	reviewed	UPF0705 protein C11orf49	C11orf49	Homo sapiens (Human)	331
Q9H6S0	Q9H6S0	YTDC2_HUMAN	reviewed	3'-5' RNA helicase YTHDC2 (EC 3.6.4.13) (YTH domain-containing protein 2) (hYTHDC2)	YTHDC2	Homo sapiens (Human)	1430
Q9H792	Q9H792	PEAK1_HUMAN	reviewed	Inactive tyrosine-protein kinase PEAK1 (Pseudopodium-enriched atypical kinase 1) (Sugen kinase 269) (Tyrosine-protein kinase SgK269)	PEAK1 KIAA2002	Homo sapiens (Human)	1746
Q9H7U1	Q9H7U1	CCSE2_HUMAN	reviewed	Serine-rich coiled-coil domain-containing protein 2 (Coiled-coil serine-rich protein 2) (Protein GCAP14 homolog)	CCSER2 FAM190B KIAA1128 NPD012	Homo sapiens (Human)	834
Q9H8Y8	Q9H8Y8	GORS2_HUMAN	reviewed	Golgi reassembly-stacking protein 2 (GRS2) (Golgi phosphoprotein 6) (GOLPH6) (Golgi reassembly-stacking protein of 55 kDa) (GRASP55) (p59)	GORASP2 GOLPH6	Homo sapiens (Human)	452
Q9HAU0	Q9HAU0	PKHA5_HUMAN	reviewed	Pleckstrin homology domain-containing family A member 5 (PH domain-containing family A member 5) (Phosphoinositol 3-phosphate-binding protein 2) (PEPP-2)	PLEKHA5 KIAA1686 PEPP2	Homo sapiens (Human)	1116
Q9HB21	Q9HB21	PKHA1_HUMAN	reviewed	Pleckstrin homology domain-containing family A member 1 (PH domain-containing family A member 1) (Tandem PH domain-containing protein 1) (TAPP-1)	PLEKHA1 TAPP1	Homo sapiens (Human)	404
Q9HC62	Q9HC62	SENP2_HUMAN	reviewed	Sentrin-specific protease 2 (EC 3.4.22.-) (Axam2) (SMT3-specific isopeptidase 2) (Smt3ip2) (Sentrin/SUMO-specific protease SENP2)	SENP2 KIAA1331	Homo sapiens (Human)	589
Q9HCM3	Q9HCM3	K1549_HUMAN	reviewed	UPF0606 protein KIAA1549	KIAA1549	Homo sapiens (Human)	1950
Q9HCM4	Q9HCM4	E41L5_HUMAN	reviewed	Band 4.1-like protein 5	EPB41L5 KIAA1548	Homo sapiens (Human)	733
Q9NP61	Q9NP61	ARFG3_HUMAN	reviewed	ADP-ribosylation factor GTPase-activating protein 3 (ARF GAP 3)	ARFGAP3 ARFGAP1	Homo sapiens (Human)	516
Q9NR12	Q9NR12	PDLI7_HUMAN	reviewed	PDZ and LIM domain protein 7 (LIM mineralization protein) (LMP) (Protein enigma)	PDLIM7 ENIGMA	Homo sapiens (Human)	457
Q9NRA8	Q9NRA8	4ET_HUMAN	reviewed	Eukaryotic translation initiation factor 4E transporter (4E-T) (eIF4E transporter) (Eukaryotic translation initiation factor 4E nuclear import factor 1)	EIF4ENIF1	Homo sapiens (Human)	985
Q9NRM7	Q9NRM7	LATS2_HUMAN	reviewed	Serine/threonine-protein kinase LATS2 (EC 2.7.11.1) (Kinase phosphorylated during mitosis protein) (Large tumor suppressor homolog 2) (Serine/threonine-protein kinase kpm) (Warts-like kinase)	LATS2 KPM	Homo sapiens (Human)	1088
Q9NRY6	Q9NRY6	PLS3_HUMAN	reviewed	Phospholipid scramblase 3 (PL scramblase 3) (Ca(2+)-dependent phospholipid scramblase 3)	PLSCR3	Homo sapiens (Human)	295
Q9NU19	Q9NU19	TB22B_HUMAN	reviewed	TBC1 domain family member 22B	TBC1D22B C6orf197	Homo sapiens (Human)	505
Q9NXE4	Q9NXE4	NSMA3_HUMAN	reviewed	Sphingomyelin phosphodiesterase 4 (EC 3.1.4.12) (Neutral sphingomyelinase 3) (nSMase-3) (nSMase3) (Neutral sphingomyelinase III)	SMPD4 KIAA1418 SKNY	Homo sapiens (Human)	866
Q9NYJ8	Q9NYJ8	TAB2_HUMAN	reviewed	TGF-beta-activated kinase 1 and MAP3K7-binding protein 2 (Mitogen-activated protein kinase kinase kinase 7-interacting protein 2) (TAK1-binding protein 2) (TAB-2) (TGF-beta-activated kinase 1-binding protein 2)	TAB2 KIAA0733 MAP3K7IP2	Homo sapiens (Human)	693
Q9NZ52	Q9NZ52	GGA3_HUMAN	reviewed	ADP-ribosylation factor-binding protein GGA3 (Golgi-localized, gamma ear-containing, ARF-binding protein 3)	GGA3 KIAA0154	Homo sapiens (Human)	723
Q9P206	Q9P206	K1522_HUMAN	reviewed	Uncharacterized protein KIAA1522	KIAA1522	Homo sapiens (Human)	1035
Q9P246	Q9P246	STIM2_HUMAN	reviewed	Stromal interaction molecule 2	STIM2 KIAA1482	Homo sapiens (Human)	746
Q9P2D6	Q9P2D6	F135A_HUMAN	reviewed	Protein FAM135A	FAM135A KIAA1411	Homo sapiens (Human)	1515
Q9P2F5	Q9P2F5	STOX2_HUMAN	reviewed	Storkhead-box protein 2	STOX2 KIAA1392	Homo sapiens (Human)	926
Q9P2F8	Q9P2F8	SI1L2_HUMAN	reviewed	Signal-induced proliferation-associated 1-like protein 2 (SIPA1-like protein 2)	SIPA1L2 KIAA1389	Homo sapiens (Human)	1722
U3KPZ7	U3KPZ7	U3KPZ7_HUMAN	unreviewed	Uncharacterized protein		Homo sapiens (Human)	1027
Q9UGI8	Q9UGI8	TES_HUMAN	reviewed	Testin (TESS)	TES	Homo sapiens (Human)	421
Q9UGP4	Q9UGP4	LIMD1_HUMAN	reviewed	LIM domain-containing protein 1	LIMD1	Homo sapiens (Human)	676
Q9UGU0	Q9UGU0	TCF20_HUMAN	reviewed	Transcription factor 20 (TCF-20) (Nuclear factor SPBP) (Protein AR1) (Stromelysin-1 PDGF-responsive element-binding protein) (SPRE-binding protein)	TCF20 KIAA0292 SPBP	Homo sapiens (Human)	1960
Q9UHD8	Q9UHD8	SEPT9_HUMAN	reviewed	Septin-9 (MLL septin-like fusion protein MSF-A) (MLL septin-like fusion protein) (Ovarian/Breast septin) (Ov/Br septin) (Septin D1)	SEPTIN9 KIAA0991 MSF SEPT9	Homo sapiens (Human)	586
Q9UJF2	Q9UJF2	NGAP_HUMAN	reviewed	Ras GTPase-activating protein nGAP (RAS protein activator-like 2)	RASAL2 NGAP	Homo sapiens (Human)	1139
Q9UKZ4	Q9UKZ4	TEN1_HUMAN	reviewed	Teneurin-1 (Ten-1) (Protein Odd Oz/ten-m homolog 1) (Tenascin-M1) (Ten-m1) (Teneurin transmembrane protein 1) [Cleaved into: Ten-1 intracellular domain (IDten-1) (Ten-1 ICD); Teneurin C-terminal-associated peptide (TCPA-1) (Ten-1 extracellular domain) (Ten-1 ECD)]	TENM1 ODZ1 TNM1	Homo sapiens (Human)	2725
Q9ULC8	Q9ULC8	ZDHC8_HUMAN	reviewed	Probable palmitoyltransferase ZDHHC8 (EC 2.3.1.225) (Zinc finger DHHC domain-containing protein 8) (DHHC-8) (Zinc finger protein 378)	ZDHHC8 KIAA1292 ZDHHCL1 ZNF378	Homo sapiens (Human)	765
Q9ULH0	Q9ULH0	KDIS_HUMAN	reviewed	Kinase D-interacting substrate of 220 kDa (Ankyrin repeat-rich membrane-spanning protein)	KIDINS220 ARMS KIAA1250	Homo sapiens (Human)	1771
Q9ULK5	Q9ULK5	VANG2_HUMAN	reviewed	Vang-like protein 2 (Loop-tail protein 1 homolog) (Strabismus 1) (Van Gogh-like protein 2)	VANGL2 KIAA1215 STB1	Homo sapiens (Human)	521
Q9UM54	Q9UM54	MYO6_HUMAN	reviewed	Unconventional myosin-VI (Unconventional myosin-6)	MYO6 KIAA0389	Homo sapiens (Human)	1294
Q9UPM8	Q9UPM8	AP4E1_HUMAN	reviewed	AP-4 complex subunit epsilon-1 (AP-4 adaptor complex subunit epsilon) (Adaptor-related protein complex 4 subunit epsilon-1) (Epsilon subunit of AP-4) (Epsilon-adaptin)	AP4E1	Homo sapiens (Human)	1137
Q9UPN3	Q9UPN3	MACF1_HUMAN	reviewed	Microtubule-actin cross-linking factor 1, isoforms 1/2/3/5 (620 kDa actin-binding protein) (ABP620) (Actin cross-linking family protein 7) (Macrophin-1) (Trabeculin-alpha)	MACF1 ABP620 ACF7 KIAA0465 KIAA1251	Homo sapiens (Human)	7388
Q9UPQ9	Q9UPQ9	TNR6B_HUMAN	reviewed	Trinucleotide repeat-containing gene 6B protein	TNRC6B KIAA1093	Homo sapiens (Human)	1833
Q9UPS8	Q9UPS8	ANR26_HUMAN	reviewed	Ankyrin repeat domain-containing protein 26	ANKRD26 KIAA1074	Homo sapiens (Human)	1710
Q9Y217	Q9Y217	MTMR6_HUMAN	reviewed	Myotubularin-related protein 6 (Phosphatidylinositol-3,5-bisphosphate 3-phosphatase) (EC 3.1.3.95) (Phosphatidylinositol-3-phosphate phosphatase) (EC 3.1.3.64)	MTMR6	Homo sapiens (Human)	621
Q9Y2G0	Q9Y2G0	EFR3B_HUMAN	reviewed	Protein EFR3 homolog B	EFR3B KIAA0953	Homo sapiens (Human)	817
Q9Y2U8	Q9Y2U8	MAN1_HUMAN	reviewed	Inner nuclear membrane protein Man1 (LEM domain-containing protein 3)	LEMD3 MAN1	Homo sapiens (Human)	911
Q9Y4L1	Q9Y4L1	HYOU1_HUMAN	reviewed	Hypoxia up-regulated protein 1 (150 kDa oxygen-regulated protein) (ORP-150) (170 kDa glucose-regulated protein) (GRP-170)	HYOU1 GRP170 ORP150	Homo sapiens (Human)	999
Q9Y5V3	Q9Y5V3	MAGD1_HUMAN	reviewed	Melanoma-associated antigen D1 (MAGE tumor antigen CCF) (MAGE-D1 antigen) (Neurotrophin receptor-interacting MAGE homolog)	MAGED1 NRAGE PP2250 PRO2292	Homo sapiens (Human)	778
Q9Y6Y8	Q9Y6Y8	S23IP_HUMAN	reviewed	SEC23-interacting protein (p125)	SEC23IP MSTP053	Homo sapiens (Human)	1000
