# Supplementary material for: RNF43 inhibits WNT5A-driven signaling and suppresses melanoma invasion and resistance to the targeted therapy
Source: eLife. 2021 Oct 27;10:e65759. doi: 10.7554/eLife.65759 (PMC8550759; doi:10.7554/eLife.65759)
Supplement: Figure 1—source data 2. [file elife-65759-fig1-data2.xlsx]

## Sheet: gProfiler GO terms analysis
source	term_name	term_id	adjusted_p_value	negative_log10_of_adjusted_p_value	term_size	query_size	intersection_size	effective_domain_size	intersections
GO:MF	protein binding	GO:0005515	8.32e-16	15.0796	12715	247	229	18098	A0A2R8YDH4	A5YKK6	A7KAX9	A8CG34	O00161	O00213	O14497	O14639	O14640	O14641	O14654	O14776	O14964	O15027	O15061	O15169	O15504	O43809	O60716	O60858	O75113	O75182	O75410	O75420	O75694	O95210	O95425	O95486	O95487	O95819	P06493	P07237	P08670	P09234	P09651	P10071	P11021	P14625	P17844	Q16720	P22626
GO:MF	RNA binding	GO:0003723	1.95e-09	8.71054	1902	247	64	18098	A5YKK6	O14776	O15037	O15504	O43809	P07237	P08670	P09234	P09651	P14625	P17844	P22626	P27824	P30101	P42694	P43243	P46013	P49674	P49792	P50454	P51991	P52272	P55209	P61956	P62081	P62258	P62304	P98175	Q07666	Q12986	Q13283	Q14739	Q14789	Q14966	Q15032	Q15654	Q17RY0	Q5JSZ5	Q6NSI4	Q6UN15	Q6Y7W6
GO:MF	cadherin binding	GO:0045296	4.05e-07	6.39215	330	247	22	18098	O60716	P11021	P29317	P49757	P50402	P62258	Q07157	Q08379	Q12955	Q13492	Q14008	Q14160	Q14C86	Q15208	Q6Y7W6	Q7Z2W4	Q92616	Q96KG9	Q9H3U1	Q9UGI8	Q9UHD8	Q9UPN3
GO:MF	cell adhesion molecule binding	GO:0050839	2.49781e-06	5.60244	502	247	26	18098	O60716	P07237	P11021	P29317	P46939	P49069	P49757	P50402	P62258	Q07157	Q08379	Q12955	Q13492	Q14008	Q14160	Q14C86	Q15208	Q6Y7W6	Q7Z2W4	Q92616	Q96KG9	Q9H3U1	Q9UGI8	Q9UHD8	Q9UKZ4	Q9UPN3
GO:MF	structural constituent of nuclear pore	GO:0017056	3.07863e-05	4.51164	28	247	7	18098	A8CG34	O75694	P49790	P57740	Q8WUM0	Q96HA1	Q9BTX1
GO:MF	binding	GO:0005488	6.41457e-05	4.19283	15910	247	240	18098	A0A2R8YDH4	A5YKK6	A7KAX9	A8CG34	O00161	O00213	O14497	O14639	O14640	O14641	O14654	O14776	O14964	O15027	O15037	O15061	O15169	O15504	O43809	O60716	O60858	O75113	O75182	O75410	O75420	O75694	O75976	O95210	O95425	O95486	O95487	O95819	P06493	P07237	P08670	P09234	P09651	P10071	P11021	P14625	P17844
GO:MF	enzyme binding	GO:0019899	0.000672292	3.17244	2228	247	57	18098	O00213	O14640	O14641	O14964	O15169	O43809	O60716	O95210	P07237	P10071	P11021	P14625	P17844	P25054	P27105	P46939	P49069	P49792	P55011	P61956	P62081	P62258	Q01974	Q08379	Q13370	Q13492	Q13501	Q14596	Q14C86	Q15208	Q15654	Q15678	Q15811	Q3V6T2	Q5JTV8	Q5T0W9	Q6XZF7	Q7Z6J0	Q86XL3	Q8NEV8	Q8TBA6
GO:MF	molecular adaptor activity	GO:0060090	0.0163213	1.78725	249	247	13	18098	A5YKK6	O14641	O14654	O15169	P49790	Q07666	Q12955	Q13625	Q15811	Q7Z6J0	Q8TDM6	Q8WU20	Q92783
GO:MF	protein domain specific binding	GO:0019904	0.0166658	1.77817	708	247	24	18098	A5YKK6	O14641	O14964	O15169	P08670	P09651	P11021	P17844	Q16720	P52272	P62258	Q07157	Q07666	Q13501	Q13625	Q14739	Q16625	Q96A65	Q9C026	Q9HB21	Q9HC62	Q9HCM4	Q9NRY6	Q9ULH0
GO:MF	signaling adaptor activity	GO:0035591	0.024071	1.61851	98	247	8	18098	O14654	O15169	Q07666	Q13625	Q7Z6J0	Q8TDM6	Q8WU20	Q92783
GO:MF	cytoskeletal protein binding	GO:0008092	0.0327529	1.48475	984	247	29	18098	O00213	O14639	O15061	O95425	O95819	P25054	P46939	P50402	Q08379	Q12955	Q13492	Q3V6T2	Q5JTV8	Q5SNT2	Q5T5Y3	Q8IWC1	Q8N5G2	Q8TCU4	Q8TDM6	Q8WZ42	Q969F2	Q96J84	Q9BXF6	Q9H329	Q9H7U1	Q9HCM4	Q9NR12	Q9UM54	Q9UPN3
GO:MF	frizzled binding	GO:0005109	0.0497236	1.30344	36	247	5	18098	O14640	O14641	Q01974	Q68DV7	Q92997
GO:MF	protein binding	GO:0005515	8.32e-16	15.0796	12715	247	229	18098	A0A2R8YDH4	A5YKK6	A7KAX9	A8CG34	O00161	O00213	O14497	O14639	O14640	O14641	O14654	O14776	O14964	O15027	O15061	O15169	O15504	O43809	O60716	O60858	O75113	O75182	O75410	O75420	O75694	O95210	O95425	O95486	O95487	O95819	P06493	P07237	P08670	P09234	P09651	P10071	P11021	P14625	P17844	Q16720	P22626
GO:MF	RNA binding	GO:0003723	1.95e-09	8.71054	1902	247	64	18098	A5YKK6	O14776	O15037	O15504	O43809	P07237	P08670	P09234	P09651	P14625	P17844	P22626	P27824	P30101	P42694	P43243	P46013	P49674	P49792	P50454	P51991	P52272	P55209	P61956	P62081	P62258	P62304	P98175	Q07666	Q12986	Q13283	Q14739	Q14789	Q14966	Q15032	Q15654	Q17RY0	Q5JSZ5	Q6NSI4	Q6UN15	Q6Y7W6
GO:MF	cadherin binding	GO:0045296	4.05e-07	6.39215	330	247	22	18098	O60716	P11021	P29317	P49757	P50402	P62258	Q07157	Q08379	Q12955	Q13492	Q14008	Q14160	Q14C86	Q15208	Q6Y7W6	Q7Z2W4	Q92616	Q96KG9	Q9H3U1	Q9UGI8	Q9UHD8	Q9UPN3
GO:MF	cell adhesion molecule binding	GO:0050839	2.49781e-06	5.60244	502	247	26	18098	O60716	P07237	P11021	P29317	P46939	P49069	P49757	P50402	P62258	Q07157	Q08379	Q12955	Q13492	Q14008	Q14160	Q14C86	Q15208	Q6Y7W6	Q7Z2W4	Q92616	Q96KG9	Q9H3U1	Q9UGI8	Q9UHD8	Q9UKZ4	Q9UPN3
GO:MF	structural constituent of nuclear pore	GO:0017056	3.07863e-05	4.51164	28	247	7	18098	A8CG34	O75694	P49790	P57740	Q8WUM0	Q96HA1	Q9BTX1
GO:MF	binding	GO:0005488	6.41457e-05	4.19283	15910	247	240	18098	A0A2R8YDH4	A5YKK6	A7KAX9	A8CG34	O00161	O00213	O14497	O14639	O14640	O14641	O14654	O14776	O14964	O15027	O15037	O15061	O15169	O15504	O43809	O60716	O60858	O75113	O75182	O75410	O75420	O75694	O75976	O95210	O95425	O95486	O95487	O95819	P06493	P07237	P08670	P09234	P09651	P10071	P11021	P14625	P17844
GO:MF	enzyme binding	GO:0019899	0.000672292	3.17244	2228	247	57	18098	O00213	O14640	O14641	O14964	O15169	O43809	O60716	O95210	P07237	P10071	P11021	P14625	P17844	P25054	P27105	P46939	P49069	P49792	P55011	P61956	P62081	P62258	Q01974	Q08379	Q13370	Q13492	Q13501	Q14596	Q14C86	Q15208	Q15654	Q15678	Q15811	Q3V6T2	Q5JTV8	Q5T0W9	Q6XZF7	Q7Z6J0	Q86XL3	Q8NEV8	Q8TBA6
GO:MF	molecular adaptor activity	GO:0060090	0.0163213	1.78725	249	247	13	18098	A5YKK6	O14641	O14654	O15169	P49790	Q07666	Q12955	Q13625	Q15811	Q7Z6J0	Q8TDM6	Q8WU20	Q92783
GO:MF	protein domain specific binding	GO:0019904	0.0166658	1.77817	708	247	24	18098	A5YKK6	O14641	O14964	O15169	P08670	P09651	P11021	P17844	Q16720	P52272	P62258	Q07157	Q07666	Q13501	Q13625	Q14739	Q16625	Q96A65	Q9C026	Q9HB21	Q9HC62	Q9HCM4	Q9NRY6	Q9ULH0
GO:MF	signaling adaptor activity	GO:0035591	0.024071	1.61851	98	247	8	18098	O14654	O15169	Q07666	Q13625	Q7Z6J0	Q8TDM6	Q8WU20	Q92783
GO:MF	cytoskeletal protein binding	GO:0008092	0.0327529	1.48475	984	247	29	18098	O00213	O14639	O15061	O95425	O95819	P25054	P46939	P50402	Q08379	Q12955	Q13492	Q3V6T2	Q5JTV8	Q5SNT2	Q5T5Y3	Q8IWC1	Q8N5G2	Q8TCU4	Q8TDM6	Q8WZ42	Q969F2	Q96J84	Q9BXF6	Q9H329	Q9H7U1	Q9HCM4	Q9NR12	Q9UM54	Q9UPN3
GO:MF	frizzled binding	GO:0005109	0.0497236	1.30344	36	247	5	18098	O14640	O14641	Q01974	Q68DV7	Q92997
GO:BP	macromolecule localization	GO:0033036	2.21e-13	12.6555	3228	247	100	17847	A8CG34	O00161	O00213	O14617	O14640	O14641	O14964	O15027	O15504	O75694	O95486	O95487	O95819	P06493	P09651	P10071	P11021	P14625	P22626	P25054	P27105	P27824	P29317	P33981	P49674	P49757	P49790	P49792	P50402	P51991	P57740	P62081	P62258	Q07666	Q08379	Q12955	Q13492	Q13501	Q13625	Q14008	Q14160
GO:BP	cellular localization	GO:0051641	2.82e-13	12.5498	2974	247	95	17847	A2RUB1	A8CG34	O00161	O14617	O14640	O14641	O14964	O15027	O15504	O75694	O95210	O95486	O95487	O95819	P06493	P09651	P10071	P11021	P14625	P22626	P25054	P27105	P27824	P29317	P33981	P49674	P49757	P49790	P49792	P50402	P57740	P62081	P62258	P62304	Q07666	Q08379	Q12955	Q13492	Q13501	Q13625	Q14008
GO:BP	protein localization	GO:0008104	7.8e-13	12.1077	2863	247	92	17847	A8CG34	O00161	O00213	O14617	O14640	O14641	O14964	O15027	O15504	O75694	O95486	O95487	O95819	P06493	P10071	P11021	P14625	P22626	P25054	P27105	P27824	P29317	P33981	P49674	P49757	P49790	P49792	P50402	P57740	P62081	P62258	Q08379	Q12955	Q13492	Q13501	Q13625	Q14160	Q14789	Q14C86	Q15643	Q15678
GO:BP	cellular protein localization	GO:0034613	1.16e-12	11.9341	1945	247	73	17847	A8CG34	O14617	O14640	O14641	O14964	O15027	O15504	O75694	O95486	O95487	P06493	P10071	P11021	P14625	P22626	P25054	P27105	P29317	P33981	P49674	P49757	P49790	P49792	P50402	P57740	P62081	P62258	Q12955	Q13492	Q13501	Q13625	Q14160	Q14789	Q15643	Q15678	Q15811	Q3V6T2	Q4VCS5	Q5HYI8	Q5JRA6	Q5JTV8
GO:BP	cellular macromolecule localization	GO:0070727	1.57e-12	11.8034	1956	247	73	17847	A8CG34	O14617	O14640	O14641	O14964	O15027	O15504	O75694	O95486	O95487	P06493	P10071	P11021	P14625	P22626	P25054	P27105	P29317	P33981	P49674	P49757	P49790	P49792	P50402	P57740	P62081	P62258	Q12955	Q13492	Q13501	Q13625	Q14160	Q14789	Q15643	Q15678	Q15811	Q3V6T2	Q4VCS5	Q5HYI8	Q5JRA6	Q5JTV8
GO:BP	establishment of localization in cell	GO:0051649	1.16e-10	9.93529	2271	247	76	17847	A2RUB1	A8CG34	O00161	O14617	O14640	O14964	O15027	O15504	O75694	O95210	O95486	O95487	O95819	P09651	P10071	P11021	P14625	P22626	P27105	P27824	P49757	P49790	P49792	P50402	P57740	P62081	P62258	P62304	Q07666	Q08379	Q12955	Q13492	Q13501	Q13625	Q14160	Q14789	Q15643	Q15678	Q15811	Q3V6T2	Q5HYI8
GO:BP	intracellular transport	GO:0046907	1.65e-10	9.78231	1759	247	65	17847	A8CG34	O00161	O14617	O14964	O15027	O15504	O75694	O95210	O95486	O95487	P09651	P10071	P11021	P14625	P22626	P27105	P49790	P49792	P50402	P57740	P62081	P62258	P62304	Q07666	Q08379	Q12955	Q13492	Q13501	Q14160	Q14789	Q15643	Q15678	Q3V6T2	Q5HYI8	Q5JRA6	Q5SNT2	Q5T5U3	Q6UN15	Q7Z3T8	Q8N6T3	Q8NEV8
GO:BP	RNA transport	GO:0050658	7.08e-09	8.14989	195	247	20	17847	A8CG34	O15504	O75694	P09651	P22626	P49790	P49792	P51991	P57740	Q07666	Q14008	Q6UN15	Q8WUM0	Q8WYP5	Q92540	Q96HA1	Q99700	Q9BTX1	Q9HC62	U3KPZ7
GO:BP	nucleic acid transport	GO:0050657	7.08e-09	8.14989	195	247	20	17847	A8CG34	O15504	O75694	P09651	P22626	P49790	P49792	P51991	P57740	Q07666	Q14008	Q6UN15	Q8WUM0	Q8WYP5	Q92540	Q96HA1	Q99700	Q9BTX1	Q9HC62	U3KPZ7
GO:BP	nuclear export	GO:0051168	8.56e-09	8.0673	197	247	20	17847	A8CG34	O15504	O75694	P09651	P22626	P49790	P49792	P50402	P57740	P62258	Q07666	Q15678	Q6UN15	Q8WUM0	Q92540	Q96HA1	Q9BRK4	Q9BTX1	Q9NRA8	U3KPZ7
GO:BP	establishment of RNA localization	GO:0051236	9.41e-09	8.02637	198	247	20	17847	A8CG34	O15504	O75694	P09651	P22626	P49790	P49792	P51991	P57740	Q07666	Q14008	Q6UN15	Q8WUM0	Q8WYP5	Q92540	Q96HA1	Q99700	Q9BTX1	Q9HC62	U3KPZ7
GO:BP	establishment of protein localization	GO:0045184	1.83e-08	7.73777	2199	247	70	17847	A8CG34	O00161	O00213	O14617	O14964	O15027	O15504	O75694	O95486	O95487	O95819	P10071	P11021	P14625	P22626	P27105	P27824	P49757	P49790	P49792	P50402	P57740	P62081	P62258	Q08379	Q12955	Q13625	Q14160	Q14C86	Q15643	Q15678	Q15811	Q53EZ4	Q5HYI8	Q5JRA6	Q6UN15	Q7Z3T8	Q7Z7G8	Q8N6T3	Q8NDI1	Q8NEV8
GO:BP	RNA localization	GO:0006403	1.85e-07	6.73214	233	247	20	17847	A8CG34	O15504	O75694	P09651	P22626	P49790	P49792	P51991	P57740	Q07666	Q14008	Q6UN15	Q8WUM0	Q8WYP5	Q92540	Q96HA1	Q99700	Q9BTX1	Q9HC62	U3KPZ7
GO:BP	nucleobase-containing compound transport	GO:0015931	4.24e-07	6.37314	244	247	20	17847	A8CG34	O15504	O75694	P09651	P22626	P49790	P49792	P51991	P57740	Q07666	Q14008	Q6UN15	Q8WUM0	Q8WYP5	Q92540	Q96HA1	Q99700	Q9BTX1	Q9HC62	U3KPZ7
GO:BP	mRNA transport	GO:0051028	6.12e-07	6.21326	150	247	16	17847	A8CG34	O15504	O75694	P09651	P22626	P49790	P49792	P51991	P57740	Q6UN15	Q8WUM0	Q8WYP5	Q92540	Q96HA1	Q9BTX1	Q9HC62
GO:BP	protein transport	GO:0015031	8.83e-07	6.05404	2084	247	64	17847	A8CG34	O00161	O00213	O14617	O14964	O15027	O15504	O75694	O95486	O95487	O95819	P10071	P11021	P14625	P22626	P27105	P27824	P49757	P49790	P49792	P50402	P57740	P62081	P62258	Q08379	Q12955	Q14160	Q14C86	Q15643	Q15678	Q15811	Q5HYI8	Q5JRA6	Q6UN15	Q7Z3T8	Q7Z7G8	Q8N6T3	Q8NDI1	Q8NEV8	Q8TEW0	Q8WUM0
GO:BP	nitrogen compound transport	GO:0071705	1.23065e-06	5.90987	2466	247	71	17847	A8CG34	O00161	O00213	O14617	O14964	O15027	O15504	O75694	O95486	O95487	O95819	P09651	P10071	P11021	P14625	P22626	P27105	P27824	P49757	P49790	P49792	P50402	P51991	P55011	P57740	P62081	P62258	Q07666	Q08379	Q12955	Q14008	Q14160	Q14C86	Q15643	Q15678	Q15811	Q5HYI8	Q5JRA6	Q6UN15	Q7Z3T8	Q7Z7G8
GO:BP	tRNA-containing ribonucleoprotein complex export from nucleus	GO:0071431	1.30164e-06	5.88551	34	247	9	17847	A8CG34	O15504	O75694	P49790	P49792	P57740	Q8WUM0	Q96HA1	Q9BTX1
GO:BP	tRNA export from nucleus	GO:0006409	1.30164e-06	5.88551	34	247	9	17847	A8CG34	O15504	O75694	P49790	P49792	P57740	Q8WUM0	Q96HA1	Q9BTX1
GO:BP	cellular component organization	GO:0016043	1.82891e-06	5.73781	6454	247	136	17847	A0A2R8YDH4	A2RUB1	A5YKK6	O00161	O00213	O14497	O14617	O14639	O14640	O14641	O14964	O15027	O15061	O15169	O43809	O60716	O75182	O75410	O75694	O95425	O95486	O95487	O95819	P06493	P07237	P08670	P09234	P09651	P10071	P11021	P14625	P22626	P25054	P27105	P29317	P33981	P46013	P46939	P48729	P49674	P49757
GO:BP	intracellular protein transport	GO:0006886	1.87132e-06	5.72785	1162	247	44	17847	A8CG34	O14617	O14964	O15027	O15504	O75694	O95486	O95487	P10071	P11021	P14625	P22626	P27105	P49790	P49792	P50402	P57740	P62081	P62258	Q12955	Q14160	Q15643	Q15678	Q5HYI8	Q6UN15	Q7Z3T8	Q8NEV8	Q8TEW0	Q8WUM0	Q92540	Q92738	Q92783	Q92890	Q96A65	Q96HA1	Q96RT1	Q9BTX1	Q9NP61	Q9NU19	Q9NZ52	Q9UKZ4
GO:BP	RNA export from nucleus	GO:0006405	1.89508e-06	5.72237	139	247	15	17847	A8CG34	O15504	O75694	P09651	P22626	P49790	P49792	P57740	Q07666	Q6UN15	Q8WUM0	Q92540	Q96HA1	Q9BTX1	U3KPZ7
GO:BP	peptide transport	GO:0015833	1.92661e-06	5.71521	2124	247	64	17847	A8CG34	O00161	O00213	O14617	O14964	O15027	O15504	O75694	O95486	O95487	O95819	P10071	P11021	P14625	P22626	P27105	P27824	P49757	P49790	P49792	P50402	P57740	P62081	P62258	Q08379	Q12955	Q14160	Q14C86	Q15643	Q15678	Q15811	Q5HYI8	Q5JRA6	Q6UN15	Q7Z3T8	Q7Z7G8	Q8N6T3	Q8NDI1	Q8NEV8	Q8TEW0	Q8WUM0
GO:BP	tRNA transport	GO:0051031	2.28061e-06	5.64195	36	247	9	17847	A8CG34	O15504	O75694	P49790	P49792	P57740	Q8WUM0	Q96HA1	Q9BTX1
GO:BP	amide transport	GO:0042886	3.66828e-06	5.43554	2158	247	64	17847	A8CG34	O00161	O00213	O14617	O14964	O15027	O15504	O75694	O95486	O95487	O95819	P10071	P11021	P14625	P22626	P27105	P27824	P49757	P49790	P49792	P50402	P57740	P62081	P62258	Q08379	Q12955	Q14160	Q14C86	Q15643	Q15678	Q15811	Q5HYI8	Q5JRA6	Q6UN15	Q7Z3T8	Q7Z7G8	Q8N6T3	Q8NDI1	Q8NEV8	Q8TEW0	Q8WUM0
GO:BP	ncRNA export from nucleus	GO:0097064	3.85487e-06	5.41399	38	247	9	17847	A8CG34	O15504	O75694	P49790	P49792	P57740	Q8WUM0	Q96HA1	Q9BTX1
GO:BP	cellular component organization or biogenesis	GO:0071840	6.7275e-06	5.17215	6636	247	137	17847	A0A2R8YDH4	A2RUB1	A5YKK6	O00161	O00213	O14497	O14617	O14639	O14640	O14641	O14964	O15027	O15061	O15169	O43809	O60716	O75182	O75410	O75694	O95425	O95486	O95487	O95819	P06493	P07237	P08670	P09234	P09651	P10071	P11021	P14625	P22626	P25054	P27105	P29317	P33981	P46013	P46939	P48729	P49674	P49757
GO:BP	nucleocytoplasmic transport	GO:0006913	7.51111e-06	5.1243	349	247	22	17847	A8CG34	O15504	O75694	P09651	P10071	P22626	P49790	P49792	P50402	P57740	P62258	P62304	Q07666	Q15678	Q6UN15	Q8WUM0	Q92540	Q96HA1	Q9BRK4	Q9BTX1	Q9NRA8	U3KPZ7
GO:BP	regulation of catabolic process	GO:0009894	8.24369e-06	5.08388	998	247	39	17847	A2RUB1	A5YKK6	A8CG34	O14640	O14964	O15169	O15504	O60858	O75113	O75694	P08670	P25054	P48729	P49069	P49674	P49790	P49792	P52272	P61956	P57740	P62081	P98175	Q08379	Q13370	Q6Y7W6	Q7Z2W4	Q86UE4	Q8IZH2	Q8N5C8	Q8NDV7	Q8WUM0	Q969F2	Q96A65	Q96HA1	Q96T21	Q9BTX1	Q9NYJ8	Q9NZ52	Q9UPQ9
GO:BP	nuclear transport	GO:0051169	8.79176e-06	5.05592	352	247	22	17847	A8CG34	O15504	O75694	P09651	P10071	P22626	P49790	P49792	P50402	P57740	P62258	P62304	Q07666	Q15678	Q6UN15	Q8WUM0	Q92540	Q96HA1	Q9BRK4	Q9BTX1	Q9NRA8	U3KPZ7
GO:BP	negative regulation of canonical Wnt signaling pathway	GO:0090090	1.4497e-05	4.83872	186	247	16	17847	A2VDJ0	O14640	O14641	O15169	O60716	P10071	P25054	P48729	P50402	Q01974	Q13283	Q92997	Q969F2	Q9BRK4	Q9NRM7	Q9UGP4
GO:BP	negative regulation of Wnt signaling pathway	GO:0030178	1.86238e-05	4.72993	216	247	17	17847	A2VDJ0	O14640	O14641	O15169	O60716	P10071	P25054	P48729	P50402	Q01974	Q13283	Q68DV7	Q92997	Q969F2	Q9BRK4	Q9NRM7	Q9UGP4
GO:BP	protein sumoylation	GO:0016925	3.07324e-05	4.5124	81	247	11	17847	A8CG34	O15504	O75694	P49790	P49792	P61956	P57740	Q8WUM0	Q96HA1	Q9BTX1	Q9HC62
GO:BP	protein export from nucleus	GO:0006611	6.64803e-05	4.17731	180	247	15	17847	A8CG34	O15504	O75694	P22626	P49790	P49792	P50402	P57740	P62258	Q15678	Q6UN15	Q8WUM0	Q92540	Q96HA1	Q9BTX1
GO:BP	regulation of cellular protein localization	GO:1903827	7.12869e-05	4.14699	539	247	26	17847	O14640	O15027	P06493	P10071	P25054	P27105	P29317	P49674	P49757	P50402	P62258	Q12955	Q13492	Q13501	Q13625	Q14160	Q15678	Q3V6T2	Q92997	Q969F2	Q96KQ4	Q9BRK4	Q9BV40	Q9BXF6	Q9UKZ4	Q9Y5V3
GO:BP	regulation of gene silencing by miRNA	GO:0060964	8.35766e-05	4.07792	110	247	12	17847	A8CG34	O15504	O75694	P17844	P49790	P49792	P57740	Q8NDV7	Q8WUM0	Q96HA1	Q9BTX1	Q9UGP4
GO:BP	mRNA-containing ribonucleoprotein complex export from nucleus	GO:0071427	9.25705e-05	4.03353	111	247	12	17847	A8CG34	O15504	O75694	P22626	P49790	P49792	P57740	Q6UN15	Q8WUM0	Q92540	Q96HA1	Q9BTX1
GO:BP	mRNA export from nucleus	GO:0006406	9.25705e-05	4.03353	111	247	12	17847	A8CG34	O15504	O75694	P22626	P49790	P49792	P57740	Q6UN15	Q8WUM0	Q92540	Q96HA1	Q9BTX1
GO:BP	endomembrane system organization	GO:0010256	9.61205e-05	4.01718	437	247	23	17847	O14617	O14964	O15027	O75694	P06493	P48729	P50402	Q08379	Q12955	Q13501	Q14789	Q15643	Q5JRA6	Q5JTV8	Q5T5U3	Q86XL3	Q8TBA6	Q92738	Q92783	Q96JH7	Q9H8Y8	Q9NRY6	Q9Y6Y8
GO:BP	regulation of Wnt signaling pathway	GO:0030111	0.000111437	3.95297	371	247	21	17847	A2VDJ0	O14640	O14641	O15169	O60716	P10071	P25054	P48729	P49674	P50402	Q01974	Q13283	Q68DV7	Q92997	Q969F2	Q9BRK4	Q9HC62	Q9NRM7	Q9UGP4	Q9ULK5	Q9UPN3
GO:BP	regulation of posttranscriptional gene silencing	GO:0060147	0.0001132	3.94615	113	247	12	17847	A8CG34	O15504	O75694	P17844	P49790	P49792	P57740	Q8NDV7	Q8WUM0	Q96HA1	Q9BTX1	Q9UGP4
GO:BP	regulation of gene silencing by RNA	GO:0060966	0.0001132	3.94615	113	247	12	17847	A8CG34	O15504	O75694	P17844	P49790	P49792	P57740	Q8NDV7	Q8WUM0	Q96HA1	Q9BTX1	Q9UGP4
GO:BP	Wnt signaling pathway	GO:0016055	0.000147157	3.83222	521	247	25	17847	A2VDJ0	O14640	O14641	O15169	O60716	P10071	P25054	P48729	P49674	P50402	Q01973	Q01974	Q13283	Q68DV7	Q8NDV7	Q8TAA9	Q92997	Q969F2	Q9BRK4	Q9HC62	Q9NRM7	Q9UGP4	Q9ULK5	Q9UPN3	Q9UPQ9
GO:BP	cell-cell signaling by wnt	GO:0198738	0.000158394	3.80026	523	247	25	17847	A2VDJ0	O14640	O14641	O15169	O60716	P10071	P25054	P48729	P49674	P50402	Q01973	Q01974	Q13283	Q68DV7	Q8NDV7	Q8TAA9	Q92997	Q969F2	Q9BRK4	Q9HC62	Q9NRM7	Q9UGP4	Q9ULK5	Q9UPN3	Q9UPQ9
GO:BP	intracellular transport of virus	GO:0075733	0.000169227	3.77153	57	247	9	17847	A8CG34	O15504	O75694	P49790	P49792	P57740	Q8WUM0	Q96HA1	Q9BTX1
GO:BP	transport of virus	GO:0046794	0.000268217	3.57151	60	247	9	17847	A8CG34	O15504	O75694	P49790	P49792	P57740	Q8WUM0	Q96HA1	Q9BTX1
GO:BP	regulation of cellular response to heat	GO:1900034	0.000279318	3.5539	79	247	10	17847	A8CG34	O15504	O75694	P49790	P49792	P57740	P62258	Q8WUM0	Q96HA1	Q9BTX1
GO:BP	viral life cycle	GO:0019058	0.000378051	3.42245	330	247	19	17847	A8CG34	O15504	O60858	O75694	P06493	P07237	P17844	P27105	P29317	P49790	P49792	P57740	Q7Z2W4	Q8WUM0	Q92738	Q96HA1	Q9BTX1	Q9BV40	Q9H6S0
GO:BP	organic substance transport	GO:0071702	0.000433346	3.36317	2893	247	72	17847	A8CG34	O00161	O00213	O14617	O14964	O15027	O15504	O75694	O95486	O95487	O95819	P09651	P10071	P11021	P14625	P22626	P27105	P27824	P49757	P49790	P49792	P50402	P51991	P57740	P62081	P62258	Q07666	Q08379	Q12955	Q14008	Q14160	Q14C86	Q15643	Q15678	Q15811	Q5HYI8	Q5JRA6	Q6UN15	Q7Z3T8	Q7Z7G8	Q8N6T3
GO:BP	cellular component assembly	GO:0022607	0.000489725	3.31005	3017	247	74	17847	A0A2R8YDH4	A2RUB1	A5YKK6	O00161	O14639	O14640	O14964	O15027	O15169	O43809	O60716	O95486	O95487	O95819	P06493	P07237	P09234	P14625	P25054	P27105	P29317	P48729	P49674	P49790	P51617	P55209	P57740	P62258	P62304	Q07157	Q07666	Q08379	Q12955	Q13283	Q13492	Q13501	Q14008	Q14596	Q15643	Q15654	Q16625
GO:BP	ribonucleoprotein complex export from nucleus	GO:0071426	0.000492986	3.30717	129	247	12	17847	A8CG34	O15504	O75694	P22626	P49790	P49792	P57740	Q6UN15	Q8WUM0	Q92540	Q96HA1	Q9BTX1
GO:BP	ribonucleoprotein complex localization	GO:0071166	0.000536536	3.2704	130	247	12	17847	A8CG34	O15504	O75694	P22626	P49790	P49792	P57740	Q6UN15	Q8WUM0	Q92540	Q96HA1	Q9BTX1
GO:BP	organelle organization	GO:0006996	0.000564284	3.2485	3920	247	89	17847	A2RUB1	A5YKK6	O00161	O00213	O14497	O14617	O14639	O14640	O14964	O15027	O15061	O75182	O75410	O75694	O95425	O95486	O95487	P06493	P08670	P09651	P14625	P22626	P25054	P33981	P46013	P48729	P49674	P49790	P50402	P55209	P57740	P62258	Q08379	Q12955	Q13283	Q13492	Q13501	Q13625	Q14008	Q14789	Q15643
GO:BP	Golgi vesicle transport	GO:0048193	0.000609654	3.21492	375	247	20	17847	O00161	O14617	O15027	O95486	O95487	Q08379	Q12955	Q14789	Q5JRA6	Q8N6T3	Q8TBA6	Q969F2	Q96A65	Q96KG9	Q9BV40	Q9NP61	Q9NZ52	Q9UPN3	Q9Y4L1	Q9Y6Y8
GO:BP	beta-catenin destruction complex disassembly	GO:1904886	0.000628192	3.20191	21	247	6	17847	O14640	O14641	O15169	P25054	P48729	Q92997
GO:BP	cellular response to heat	GO:0034605	0.000809986	3.09152	135	247	12	17847	A8CG34	O15504	O75694	P11021	P49790	P49792	P51617	P57740	P62258	Q8WUM0	Q96HA1	Q9BTX1
GO:BP	regulation of cellular localization	GO:0060341	0.00101563	2.99327	918	247	33	17847	O14640	O15027	O95487	O95819	P06493	P10071	P25054	P27105	P29317	P49674	P49757	P49790	P50402	P62258	Q07666	Q12955	Q13492	Q13501	Q13625	Q14160	Q15678	Q3V6T2	Q8TEW0	Q92997	Q969F2	Q96KQ4	Q99767	Q9BRK4	Q9BV40	Q9BXF6	U3KPZ7	Q9UKZ4	Q9Y5V3
GO:BP	posttranscriptional regulation of gene expression	GO:0010608	0.00124061	2.90636	837	247	31	17847	A2RUB1	A5YKK6	A8CG34	O15504	O43809	O75694	P08670	P17844	P22626	P42694	P43243	P49790	P49792	P52272	P57740	P98175	Q07666	Q17RY0	Q6Y7W6	Q8IZH2	Q8NDV7	Q8WUM0	Q92616	Q96HA1	Q96T21	Q99700	Q9BTX1	Q9HCM4	Q9NRA8	Q9UGP4	Q9UPQ9
GO:BP	Golgi organization	GO:0007030	0.0012969	2.88709	141	247	12	17847	O15027	P06493	P48729	Q08379	Q14789	Q15643	Q5T5U3	Q8TBA6	Q92738	Q96JH7	Q9H8Y8	Q9Y6Y8
GO:BP	multi-organism localization	GO:1902579	0.00133672	2.87396	72	247	9	17847	A8CG34	O15504	O75694	P49790	P49792	P57740	Q8WUM0	Q96HA1	Q9BTX1
GO:BP	multi-organism transport	GO:0044766	0.00133672	2.87396	72	247	9	17847	A8CG34	O15504	O75694	P49790	P49792	P57740	Q8WUM0	Q96HA1	Q9BTX1
GO:BP	membrane organization	GO:0061024	0.00135764	2.86721	885	247	32	17847	O00161	O14617	O14640	O14641	O14964	O15027	O75694	O95486	O95487	P06493	P50402	P62258	Q08379	Q12955	Q13492	Q13625	Q14C86	Q15811	Q3V6T2	Q53EZ4	Q5JRA6	Q5JTV8	Q86XL3	Q92783	Q969F2	Q96JH7	Q96KQ4	Q9BV40	Q9C026	Q9NP61	Q9NRY6	Q9Y6Y8
GO:BP	negative regulation of biological process	GO:0048519	0.00141628	2.84885	5596	247	114	17847	A2RUB1	A2VDJ0	A5YKK6	A8CG34	O00213	O14497	O14640	O14641	O14776	O14964	O15169	O15504	O60716	O60858	O75113	O75182	O75694	O95819	P06493	P08670	P09651	P10071	P11021	P14625	P17844	P22626	P25054	P29317	P33981	P42694	P48729	P49069	P49757	P49790	P49792	P50402	P50454	P51617	P52272	P57740	P62081
GO:BP	vesicle targeting	GO:0006903	0.001462	2.83505	94	247	10	17847	O00161	O15027	O95486	O95487	Q08379	Q14160	Q15643	Q96A65	Q9NP61	Q9Y6Y8
GO:BP	hippo signaling	GO:0035329	0.00162905	2.78807	38	247	7	17847	O14641	P62258	Q07157	Q4VCS5	Q8TDM6	Q9NRM7	Q9UGP4
GO:BP	organelle localization	GO:0051640	0.00166631	2.77825	634	247	26	17847	A2RUB1	O00161	O14617	O15027	O95486	O95487	P06493	P49674	P49792	P62258	Q08379	Q13492	Q14008	Q14160	Q15643	Q5SNT2	Q5T5U3	Q7Z4H7	Q8NHV4	Q8TCU4	Q8TEW0	Q96A65	Q9BSJ8	Q9BV40	Q9NP61	Q9Y6Y8
GO:BP	protein localization to membrane	GO:0072657	0.00176767	2.7526	636	247	26	17847	O14617	O14640	O14964	O15027	O75694	P11021	P27105	P29317	P49757	P62081	P62258	Q12955	Q13492	Q13501	Q13625	Q14160	Q8TEW0	Q92953	Q969F2	Q96A65	Q96KQ4	Q9BV40	Q9H8Y8	Q9NZ52	Q9UPN3	Q9Y2G0
GO:BP	nuclear pore organization	GO:0006999	0.00183677	2.73595	14	247	5	17847	P49790	P57740	Q8WUM0	Q8WYP5	Q9BTX1
GO:BP	regulation of establishment of planar polarity involved in neural tube closure	GO:0090178	0.00183677	2.73595	14	247	5	17847	O14640	O14641	O95487	Q92997	Q9ULK5
GO:BP	regulation of gene silencing	GO:0060968	0.00251545	2.59938	150	247	12	17847	A8CG34	O15504	O75694	P17844	P49790	P49792	P57740	Q8NDV7	Q8WUM0	Q96HA1	Q9BTX1	Q9UGP4
GO:BP	neural plate morphogenesis	GO:0001839	0.00252716	2.59737	7	247	4	17847	O14640	O14641	Q9HCM4	Q9ULK5
GO:BP	establishment of planar polarity involved in neural tube closure	GO:0090177	0.00272409	2.56478	15	247	5	17847	O14640	O14641	O95487	Q92997	Q9ULK5
GO:BP	regulation of glycolytic process	GO:0006110	0.00297155	2.52702	79	247	9	17847	A8CG34	O15504	O75694	P49790	P49792	P57740	Q8WUM0	Q96HA1	Q9BTX1
GO:BP	cell surface receptor signaling pathway involved in cell-cell signaling	GO:1905114	0.00417799	2.37903	624	247	25	17847	A2VDJ0	O14640	O14641	O15169	O60716	P10071	P25054	P48729	P49674	P50402	Q01973	Q01974	Q13283	Q68DV7	Q8NDV7	Q8TAA9	Q92997	Q969F2	Q9BRK4	Q9HC62	Q9NRM7	Q9UGP4	Q9ULK5	Q9UPN3	Q9UPQ9
GO:BP	cellular component biogenesis	GO:0044085	0.00458125	2.33902	3253	247	75	17847	A0A2R8YDH4	A2RUB1	A5YKK6	O00161	O14639	O14640	O14964	O15027	O15169	O43809	O60716	O95486	O95487	O95819	P06493	P07237	P09234	P14625	P25054	P27105	P29317	P48729	P49674	P49790	P51617	P55209	P57740	P62081	P62258	P62304	Q07157	Q07666	Q08379	Q12955	Q13283	Q13492	Q13501	Q14008	Q14596	Q15643	Q15654
GO:BP	nucleus organization	GO:0006997	0.00472009	2.32605	132	247	11	17847	O75694	P06493	P49790	P50402	P57740	Q5JTV8	Q86XL3	Q8WUM0	Q8WYP5	Q9BTX1	Q9Y2U8
GO:BP	cellular response to stress	GO:0033554	0.00538553	2.26877	2064	247	54	17847	A2RUB1	A5YKK6	A8CG34	O00213	O14641	O15027	O15169	O15504	O60858	O75694	O95819	P06493	P07237	P09651	P11021	P14625	P17844	P25054	P27824	P29317	P30101	P49674	P49790	P49792	P51617	P52272	P57740	P62258	Q01974	Q13501	Q14596	Q15084	Q17RY0	Q6NSI4	Q6NZ36	Q6Y7W6	Q7Z6J0	Q8N5C8	Q8N6T3	Q8NDV7	Q8WUM0
GO:BP	neural plate elongation	GO:0014022	0.00545675	2.26307	3	247	3	17847	O14640	O14641	Q9ULK5
GO:BP	convergent extension involved in neural plate elongation	GO:0022007	0.00545675	2.26307	3	247	3	17847	O14640	O14641	Q9ULK5
GO:BP	establishment of planar polarity of embryonic epithelium	GO:0042249	0.00548747	2.26063	17	247	5	17847	O14640	O14641	O95487	Q92997	Q9ULK5
GO:BP	protein-containing complex localization	GO:0031503	0.00601256	2.22094	289	247	16	17847	A8CG34	O14617	O15504	O75694	P22626	P49757	P49790	P49792	P57740	Q14160	Q15643	Q6UN15	Q8WUM0	Q92540	Q96HA1	Q9BTX1
GO:BP	regulation of canonical Wnt signaling pathway	GO:0060828	0.0071749	2.14418	293	247	16	17847	A2VDJ0	O14640	O14641	O15169	O60716	P10071	P25054	P48729	P50402	Q01974	Q13283	Q92997	Q969F2	Q9BRK4	Q9NRM7	Q9UGP4
GO:BP	regulation of carbohydrate catabolic process	GO:0043470	0.00740427	2.13052	88	247	9	17847	A8CG34	O15504	O75694	P49790	P49792	P57740	Q8WUM0	Q96HA1	Q9BTX1
GO:BP	regulation of epithelial tube formation	GO:1905276	0.00751244	2.12422	18	247	5	17847	O14640	O14641	O95487	Q92997	Q9ULK5
GO:BP	nuclear pore complex assembly	GO:0051292	0.0089009	2.05057	9	247	4	17847	P49790	P57740	Q8WYP5	Q9BTX1
GO:BP	viral process	GO:0016032	0.00974609	2.01117	832	247	29	17847	A8CG34	O15504	O60858	O75694	P06493	P07237	P08670	P09651	P17844	P27105	P29317	P49069	P49790	P49792	P51617	P57740	P62081	P62258	Q12986	Q13283	Q14160	Q15811	Q7Z2W4	Q8WUM0	Q92738	Q96HA1	Q9BTX1	Q9BV40	Q9H6S0
GO:BP	canonical Wnt signaling pathway	GO:0060070	0.0115417	1.93773	340	247	17	17847	A2VDJ0	O14640	O14641	O15169	O60716	P10071	P25054	P48729	P49674	P50402	Q01974	Q13283	Q92997	Q969F2	Q9BRK4	Q9NRM7	Q9UGP4
GO:BP	symbiotic process	GO:0044403	0.0117048	1.93164	886	247	30	17847	A8CG34	O15504	O60716	O60858	O75694	P06493	P07237	P08670	P09651	P17844	P27105	P29317	P49069	P49790	P49792	P51617	P57740	P62081	P62258	Q12986	Q13283	Q14160	Q15811	Q7Z2W4	Q8WUM0	Q92738	Q96HA1	Q9BTX1	Q9BV40	Q9H6S0
GO:BP	response to heat	GO:0009408	0.011881	1.92515	174	247	12	17847	A8CG34	O15504	O75694	P11021	P49790	P49792	P51617	P57740	P62258	Q8WUM0	Q96HA1	Q9BTX1
GO:BP	regulation of ATP metabolic process	GO:1903578	0.0127195	1.89553	119	247	10	17847	A8CG34	O15504	O75694	P06493	P49790	P49792	P57740	Q8WUM0	Q96HA1	Q9BTX1
GO:BP	pore complex assembly	GO:0046931	0.0132895	1.87649	20	247	5	17847	P49790	P57740	Q6IQ23	Q8WYP5	Q9BTX1
GO:BP	neural plate development	GO:0001840	0.0146735	1.83346	10	247	4	17847	O14640	O14641	Q9HCM4	Q9ULK5
GO:BP	protein folding in endoplasmic reticulum	GO:0034975	0.0146735	1.83346	10	247	4	17847	P11021	P14625	P27824	P30101
GO:BP	protein localization to organelle	GO:0033365	0.0165917	1.78011	949	247	31	17847	A8CG34	O14617	O14640	O14964	O15027	O75694	P06493	P10071	P11021	P25054	P33981	P49757	P49790	P49792	P57740	P62081	P62258	Q13625	Q14160	Q14789	Q3V6T2	Q5JRA6	Q5JTV8	Q7Z3T8	Q8NHV4	Q8WUM0	Q96HA1	Q96KQ4	Q9BRK4	Q9NZ52	Q9Y5V3
GO:BP	regulation of protein localization	GO:0032880	0.0170498	1.76828	1046	247	33	17847	O00213	O14640	O15027	O95486	O95819	P06493	P10071	P25054	P27105	P29317	P49674	P49757	P50402	P62258	Q12955	Q13492	Q13501	Q13625	Q14160	Q14C86	Q15678	Q3V6T2	Q8NEV8	Q8WZ42	Q92997	Q969F2	Q96KQ4	Q9BRK4	Q9BV40	Q9BXF6	Q9HCM4	Q9UKZ4	Q9Y5V3
GO:BP	localization	GO:0051179	0.0181217	1.7418	6824	247	128	17847	A2RUB1	A8CG34	O00161	O00213	O14497	O14617	O14640	O14641	O14964	O15027	O15504	O75694	O95210	O95486	O95487	O95819	P06493	P09651	P10071	P11021	P14625	Q16720	P22626	P25054	P27105	P27824	P29317	P33981	P46939	P49674	P49757	P49790	P49792	P50402	P51991	P55011	P57740	P62081	P62258	P62304	Q01974
GO:BP	regulation of signal transduction	GO:0009966	0.0215583	1.66638	3209	247	72	17847	A2VDJ0	A5YKK6	A7KAX9	O14640	O14641	O14654	O14964	O15169	O60716	O60858	O95819	P06493	P07237	P10071	P11021	P17844	P25054	P29317	P30101	P33981	P48729	P49674	P50402	P51617	P62081	P62258	Q01973	Q01974	Q07666	Q12923	Q13283	Q13370	Q13501	Q13625	Q14160	Q14596	Q15208	Q15654	Q15811	Q4VCS5	Q53EZ4
GO:BP	regulation of neuron projection arborization	GO:0150011	0.0228078	1.64192	11	247	4	17847	O14640	O14641	Q92997	Q9UPN3
GO:BP	regulation of phosphorylation	GO:0042325	0.024347	1.61355	1626	247	44	17847	A8CG34	O14640	O14641	O14964	O15169	O15504	O75694	O95819	P06493	P25054	P29317	P33981	P49790	P49792	P51617	P57740	Q01973	Q01974	Q12923	Q13501	Q14596	Q15208	Q15811	Q3V6T2	Q7Z6J0	Q86XL3	Q8N5C8	Q8TEW0	Q8WU20	Q8WUM0	Q8WZ42	Q92616	Q92997	Q96A49	Q96HA1	Q96J84	Q9BTX1	Q9HC62	Q9NRM7	Q9NYJ8	Q9UKZ4
GO:BP	vesicle budding from membrane	GO:0006900	0.0293884	1.53182	104	247	9	17847	O14617	O15027	O95486	O95487	Q08379	Q13492	Q5JRA6	Q9NP61	Q9Y6Y8
GO:BP	cell junction organization	GO:0034330	0.0314193	1.5028	293	247	15	17847	O60716	O95819	P25054	P29317	P49757	Q07157	Q15654	Q16625	Q6IQ23	Q86UE4	Q8TDM6	Q8TEW0	Q9H792	Q9HCM4	Q9UPN3
GO:BP	vesicle organization	GO:0016050	0.0320404	1.4943	330	247	16	17847	O00161	O14617	O14964	O15027	O95486	O95487	Q08379	Q13492	Q13501	Q5JRA6	Q7Z3T8	Q92783	Q969F2	Q9C026	Q9NP61	Q9Y6Y8
GO:BP	establishment of vesicle localization	GO:0051650	0.0322765	1.49111	192	247	12	17847	O00161	O14617	O15027	O95486	O95487	Q08379	Q13492	Q14160	Q15643	Q96A65	Q9NP61	Q9Y6Y8
GO:BP	interspecies interaction between organisms	GO:0044419	0.0338481	1.47047	936	247	30	17847	A8CG34	O15504	O60716	O60858	O75694	P06493	P07237	P08670	P09651	P17844	P27105	P29317	P49069	P49790	P49792	P51617	P57740	P62081	P62258	Q12986	Q13283	Q14160	Q15811	Q7Z2W4	Q8WUM0	Q92738	Q96HA1	Q9BTX1	Q9BV40	Q9H6S0
GO:BP	regulation of mRNA metabolic process	GO:1903311	0.0345156	1.46198	332	247	16	17847	A2RUB1	A5YKK6	O43809	P08670	P09651	P17844	P22626	P52272	P98175	Q07666	Q6Y7W6	Q7Z2W4	Q8IZH2	Q8NDV7	Q96T21	Q9UPQ9
GO:BP	establishment of localization	GO:0051234	0.0375182	1.42576	5419	247	106	17847	A2RUB1	A8CG34	O00161	O00213	O14497	O14617	O14640	O14964	O15027	O15504	O75694	O95210	O95486	O95487	O95819	P09651	P10071	P11021	P14625	Q16720	P22626	P27105	P27824	P46939	P49757	P49790	P49792	P50402	P51991	P55011	P57740	P62081	P62258	P62304	Q07666	Q08379	Q12955	Q13162	Q13492	Q13501	Q13625
GO:BP	neural tube development	GO:0021915	0.0379745	1.42051	164	247	11	17847	O14497	O14640	O14641	O95487	P10071	P29317	P62081	Q14160	Q8WUM0	Q92997	Q9ULK5
GO:BP	regulation of phosphate metabolic process	GO:0019220	0.0433041	1.36347	1827	247	47	17847	A8CG34	O14640	O14641	O14964	O15169	O15504	O75694	O95819	P06493	P14625	P25054	P29317	P33981	P49790	P49792	P51617	P57740	P62258	Q01973	Q01974	Q12923	Q13501	Q14596	Q15208	Q15811	Q3V6T2	Q7Z6J0	Q86XL3	Q8N5C8	Q8TEW0	Q8WU20	Q8WUM0	Q8WZ42	Q92540	Q92616	Q92997	Q96A49	Q96HA1	Q96J84	Q9BTX1	Q9HC62
GO:BP	regulation of phosphorus metabolic process	GO:0051174	0.0445328	1.35132	1829	247	47	17847	A8CG34	O14640	O14641	O14964	O15169	O15504	O75694	O95819	P06493	P14625	P25054	P29317	P33981	P49790	P49792	P51617	P57740	P62258	Q01973	Q01974	Q12923	Q13501	Q14596	Q15208	Q15811	Q3V6T2	Q7Z6J0	Q86XL3	Q8N5C8	Q8TEW0	Q8WU20	Q8WUM0	Q8WZ42	Q92540	Q92616	Q92997	Q96A49	Q96HA1	Q96J84	Q9BTX1	Q9HC62
GO:BP	planar cell polarity pathway involved in neural tube closure	GO:0090179	0.0483494	1.31561	13	247	4	17847	O14640	O14641	Q92997	Q9ULK5
GO:BP	macromolecule localization	GO:0033036	2.21e-13	12.6555	3228	247	100	17847	A8CG34	O00161	O00213	O14617	O14640	O14641	O14964	O15027	O15504	O75694	O95486	O95487	O95819	P06493	P09651	P10071	P11021	P14625	P22626	P25054	P27105	P27824	P29317	P33981	P49674	P49757	P49790	P49792	P50402	P51991	P57740	P62081	P62258	Q07666	Q08379	Q12955	Q13492	Q13501	Q13625	Q14008	Q14160
GO:BP	cellular localization	GO:0051641	2.82e-13	12.5498	2974	247	95	17847	A2RUB1	A8CG34	O00161	O14617	O14640	O14641	O14964	O15027	O15504	O75694	O95210	O95486	O95487	O95819	P06493	P09651	P10071	P11021	P14625	P22626	P25054	P27105	P27824	P29317	P33981	P49674	P49757	P49790	P49792	P50402	P57740	P62081	P62258	P62304	Q07666	Q08379	Q12955	Q13492	Q13501	Q13625	Q14008
GO:BP	protein localization	GO:0008104	7.8e-13	12.1077	2863	247	92	17847	A8CG34	O00161	O00213	O14617	O14640	O14641	O14964	O15027	O15504	O75694	O95486	O95487	O95819	P06493	P10071	P11021	P14625	P22626	P25054	P27105	P27824	P29317	P33981	P49674	P49757	P49790	P49792	P50402	P57740	P62081	P62258	Q08379	Q12955	Q13492	Q13501	Q13625	Q14160	Q14789	Q14C86	Q15643	Q15678
GO:BP	cellular protein localization	GO:0034613	1.16e-12	11.9341	1945	247	73	17847	A8CG34	O14617	O14640	O14641	O14964	O15027	O15504	O75694	O95486	O95487	P06493	P10071	P11021	P14625	P22626	P25054	P27105	P29317	P33981	P49674	P49757	P49790	P49792	P50402	P57740	P62081	P62258	Q12955	Q13492	Q13501	Q13625	Q14160	Q14789	Q15643	Q15678	Q15811	Q3V6T2	Q4VCS5	Q5HYI8	Q5JRA6	Q5JTV8
GO:BP	cellular macromolecule localization	GO:0070727	1.57e-12	11.8034	1956	247	73	17847	A8CG34	O14617	O14640	O14641	O14964	O15027	O15504	O75694	O95486	O95487	P06493	P10071	P11021	P14625	P22626	P25054	P27105	P29317	P33981	P49674	P49757	P49790	P49792	P50402	P57740	P62081	P62258	Q12955	Q13492	Q13501	Q13625	Q14160	Q14789	Q15643	Q15678	Q15811	Q3V6T2	Q4VCS5	Q5HYI8	Q5JRA6	Q5JTV8
GO:BP	establishment of localization in cell	GO:0051649	1.16e-10	9.93529	2271	247	76	17847	A2RUB1	A8CG34	O00161	O14617	O14640	O14964	O15027	O15504	O75694	O95210	O95486	O95487	O95819	P09651	P10071	P11021	P14625	P22626	P27105	P27824	P49757	P49790	P49792	P50402	P57740	P62081	P62258	P62304	Q07666	Q08379	Q12955	Q13492	Q13501	Q13625	Q14160	Q14789	Q15643	Q15678	Q15811	Q3V6T2	Q5HYI8
GO:BP	intracellular transport	GO:0046907	1.65e-10	9.78231	1759	247	65	17847	A8CG34	O00161	O14617	O14964	O15027	O15504	O75694	O95210	O95486	O95487	P09651	P10071	P11021	P14625	P22626	P27105	P49790	P49792	P50402	P57740	P62081	P62258	P62304	Q07666	Q08379	Q12955	Q13492	Q13501	Q14160	Q14789	Q15643	Q15678	Q3V6T2	Q5HYI8	Q5JRA6	Q5SNT2	Q5T5U3	Q6UN15	Q7Z3T8	Q8N6T3	Q8NEV8
GO:BP	RNA transport	GO:0050658	7.08e-09	8.14989	195	247	20	17847	A8CG34	O15504	O75694	P09651	P22626	P49790	P49792	P51991	P57740	Q07666	Q14008	Q6UN15	Q8WUM0	Q8WYP5	Q92540	Q96HA1	Q99700	Q9BTX1	Q9HC62	U3KPZ7
GO:BP	nucleic acid transport	GO:0050657	7.08e-09	8.14989	195	247	20	17847	A8CG34	O15504	O75694	P09651	P22626	P49790	P49792	P51991	P57740	Q07666	Q14008	Q6UN15	Q8WUM0	Q8WYP5	Q92540	Q96HA1	Q99700	Q9BTX1	Q9HC62	U3KPZ7
GO:BP	nuclear export	GO:0051168	8.56e-09	8.0673	197	247	20	17847	A8CG34	O15504	O75694	P09651	P22626	P49790	P49792	P50402	P57740	P62258	Q07666	Q15678	Q6UN15	Q8WUM0	Q92540	Q96HA1	Q9BRK4	Q9BTX1	Q9NRA8	U3KPZ7
GO:BP	establishment of RNA localization	GO:0051236	9.41e-09	8.02637	198	247	20	17847	A8CG34	O15504	O75694	P09651	P22626	P49790	P49792	P51991	P57740	Q07666	Q14008	Q6UN15	Q8WUM0	Q8WYP5	Q92540	Q96HA1	Q99700	Q9BTX1	Q9HC62	U3KPZ7
GO:BP	establishment of protein localization	GO:0045184	1.83e-08	7.73777	2199	247	70	17847	A8CG34	O00161	O00213	O14617	O14964	O15027	O15504	O75694	O95486	O95487	O95819	P10071	P11021	P14625	P22626	P27105	P27824	P49757	P49790	P49792	P50402	P57740	P62081	P62258	Q08379	Q12955	Q13625	Q14160	Q14C86	Q15643	Q15678	Q15811	Q53EZ4	Q5HYI8	Q5JRA6	Q6UN15	Q7Z3T8	Q7Z7G8	Q8N6T3	Q8NDI1	Q8NEV8
GO:BP	RNA localization	GO:0006403	1.85e-07	6.73214	233	247	20	17847	A8CG34	O15504	O75694	P09651	P22626	P49790	P49792	P51991	P57740	Q07666	Q14008	Q6UN15	Q8WUM0	Q8WYP5	Q92540	Q96HA1	Q99700	Q9BTX1	Q9HC62	U3KPZ7
GO:BP	nucleobase-containing compound transport	GO:0015931	4.24e-07	6.37314	244	247	20	17847	A8CG34	O15504	O75694	P09651	P22626	P49790	P49792	P51991	P57740	Q07666	Q14008	Q6UN15	Q8WUM0	Q8WYP5	Q92540	Q96HA1	Q99700	Q9BTX1	Q9HC62	U3KPZ7
GO:BP	mRNA transport	GO:0051028	6.12e-07	6.21326	150	247	16	17847	A8CG34	O15504	O75694	P09651	P22626	P49790	P49792	P51991	P57740	Q6UN15	Q8WUM0	Q8WYP5	Q92540	Q96HA1	Q9BTX1	Q9HC62
GO:BP	protein transport	GO:0015031	8.83e-07	6.05404	2084	247	64	17847	A8CG34	O00161	O00213	O14617	O14964	O15027	O15504	O75694	O95486	O95487	O95819	P10071	P11021	P14625	P22626	P27105	P27824	P49757	P49790	P49792	P50402	P57740	P62081	P62258	Q08379	Q12955	Q14160	Q14C86	Q15643	Q15678	Q15811	Q5HYI8	Q5JRA6	Q6UN15	Q7Z3T8	Q7Z7G8	Q8N6T3	Q8NDI1	Q8NEV8	Q8TEW0	Q8WUM0
GO:BP	nitrogen compound transport	GO:0071705	1.23065e-06	5.90987	2466	247	71	17847	A8CG34	O00161	O00213	O14617	O14964	O15027	O15504	O75694	O95486	O95487	O95819	P09651	P10071	P11021	P14625	P22626	P27105	P27824	P49757	P49790	P49792	P50402	P51991	P55011	P57740	P62081	P62258	Q07666	Q08379	Q12955	Q14008	Q14160	Q14C86	Q15643	Q15678	Q15811	Q5HYI8	Q5JRA6	Q6UN15	Q7Z3T8	Q7Z7G8
GO:BP	tRNA-containing ribonucleoprotein complex export from nucleus	GO:0071431	1.30164e-06	5.88551	34	247	9	17847	A8CG34	O15504	O75694	P49790	P49792	P57740	Q8WUM0	Q96HA1	Q9BTX1
GO:BP	tRNA export from nucleus	GO:0006409	1.30164e-06	5.88551	34	247	9	17847	A8CG34	O15504	O75694	P49790	P49792	P57740	Q8WUM0	Q96HA1	Q9BTX1
GO:BP	cellular component organization	GO:0016043	1.82891e-06	5.73781	6454	247	136	17847	A0A2R8YDH4	A2RUB1	A5YKK6	O00161	O00213	O14497	O14617	O14639	O14640	O14641	O14964	O15027	O15061	O15169	O43809	O60716	O75182	O75410	O75694	O95425	O95486	O95487	O95819	P06493	P07237	P08670	P09234	P09651	P10071	P11021	P14625	P22626	P25054	P27105	P29317	P33981	P46013	P46939	P48729	P49674	P49757
GO:BP	intracellular protein transport	GO:0006886	1.87132e-06	5.72785	1162	247	44	17847	A8CG34	O14617	O14964	O15027	O15504	O75694	O95486	O95487	P10071	P11021	P14625	P22626	P27105	P49790	P49792	P50402	P57740	P62081	P62258	Q12955	Q14160	Q15643	Q15678	Q5HYI8	Q6UN15	Q7Z3T8	Q8NEV8	Q8TEW0	Q8WUM0	Q92540	Q92738	Q92783	Q92890	Q96A65	Q96HA1	Q96RT1	Q9BTX1	Q9NP61	Q9NU19	Q9NZ52	Q9UKZ4
GO:BP	RNA export from nucleus	GO:0006405	1.89508e-06	5.72237	139	247	15	17847	A8CG34	O15504	O75694	P09651	P22626	P49790	P49792	P57740	Q07666	Q6UN15	Q8WUM0	Q92540	Q96HA1	Q9BTX1	U3KPZ7
GO:BP	peptide transport	GO:0015833	1.92661e-06	5.71521	2124	247	64	17847	A8CG34	O00161	O00213	O14617	O14964	O15027	O15504	O75694	O95486	O95487	O95819	P10071	P11021	P14625	P22626	P27105	P27824	P49757	P49790	P49792	P50402	P57740	P62081	P62258	Q08379	Q12955	Q14160	Q14C86	Q15643	Q15678	Q15811	Q5HYI8	Q5JRA6	Q6UN15	Q7Z3T8	Q7Z7G8	Q8N6T3	Q8NDI1	Q8NEV8	Q8TEW0	Q8WUM0
GO:BP	tRNA transport	GO:0051031	2.28061e-06	5.64195	36	247	9	17847	A8CG34	O15504	O75694	P49790	P49792	P57740	Q8WUM0	Q96HA1	Q9BTX1
GO:BP	amide transport	GO:0042886	3.66828e-06	5.43554	2158	247	64	17847	A8CG34	O00161	O00213	O14617	O14964	O15027	O15504	O75694	O95486	O95487	O95819	P10071	P11021	P14625	P22626	P27105	P27824	P49757	P49790	P49792	P50402	P57740	P62081	P62258	Q08379	Q12955	Q14160	Q14C86	Q15643	Q15678	Q15811	Q5HYI8	Q5JRA6	Q6UN15	Q7Z3T8	Q7Z7G8	Q8N6T3	Q8NDI1	Q8NEV8	Q8TEW0	Q8WUM0
GO:BP	ncRNA export from nucleus	GO:0097064	3.85487e-06	5.41399	38	247	9	17847	A8CG34	O15504	O75694	P49790	P49792	P57740	Q8WUM0	Q96HA1	Q9BTX1
GO:BP	cellular component organization or biogenesis	GO:0071840	6.7275e-06	5.17215	6636	247	137	17847	A0A2R8YDH4	A2RUB1	A5YKK6	O00161	O00213	O14497	O14617	O14639	O14640	O14641	O14964	O15027	O15061	O15169	O43809	O60716	O75182	O75410	O75694	O95425	O95486	O95487	O95819	P06493	P07237	P08670	P09234	P09651	P10071	P11021	P14625	P22626	P25054	P27105	P29317	P33981	P46013	P46939	P48729	P49674	P49757
GO:BP	nucleocytoplasmic transport	GO:0006913	7.51111e-06	5.1243	349	247	22	17847	A8CG34	O15504	O75694	P09651	P10071	P22626	P49790	P49792	P50402	P57740	P62258	P62304	Q07666	Q15678	Q6UN15	Q8WUM0	Q92540	Q96HA1	Q9BRK4	Q9BTX1	Q9NRA8	U3KPZ7
GO:BP	regulation of catabolic process	GO:0009894	8.24369e-06	5.08388	998	247	39	17847	A2RUB1	A5YKK6	A8CG34	O14640	O14964	O15169	O15504	O60858	O75113	O75694	P08670	P25054	P48729	P49069	P49674	P49790	P49792	P52272	P61956	P57740	P62081	P98175	Q08379	Q13370	Q6Y7W6	Q7Z2W4	Q86UE4	Q8IZH2	Q8N5C8	Q8NDV7	Q8WUM0	Q969F2	Q96A65	Q96HA1	Q96T21	Q9BTX1	Q9NYJ8	Q9NZ52	Q9UPQ9
GO:BP	nuclear transport	GO:0051169	8.79176e-06	5.05592	352	247	22	17847	A8CG34	O15504	O75694	P09651	P10071	P22626	P49790	P49792	P50402	P57740	P62258	P62304	Q07666	Q15678	Q6UN15	Q8WUM0	Q92540	Q96HA1	Q9BRK4	Q9BTX1	Q9NRA8	U3KPZ7
GO:BP	negative regulation of canonical Wnt signaling pathway	GO:0090090	1.4497e-05	4.83872	186	247	16	17847	A2VDJ0	O14640	O14641	O15169	O60716	P10071	P25054	P48729	P50402	Q01974	Q13283	Q92997	Q969F2	Q9BRK4	Q9NRM7	Q9UGP4
GO:BP	negative regulation of Wnt signaling pathway	GO:0030178	1.86238e-05	4.72993	216	247	17	17847	A2VDJ0	O14640	O14641	O15169	O60716	P10071	P25054	P48729	P50402	Q01974	Q13283	Q68DV7	Q92997	Q969F2	Q9BRK4	Q9NRM7	Q9UGP4
GO:BP	protein sumoylation	GO:0016925	3.07324e-05	4.5124	81	247	11	17847	A8CG34	O15504	O75694	P49790	P49792	P61956	P57740	Q8WUM0	Q96HA1	Q9BTX1	Q9HC62
GO:BP	protein export from nucleus	GO:0006611	6.64803e-05	4.17731	180	247	15	17847	A8CG34	O15504	O75694	P22626	P49790	P49792	P50402	P57740	P62258	Q15678	Q6UN15	Q8WUM0	Q92540	Q96HA1	Q9BTX1
GO:BP	regulation of cellular protein localization	GO:1903827	7.12869e-05	4.14699	539	247	26	17847	O14640	O15027	P06493	P10071	P25054	P27105	P29317	P49674	P49757	P50402	P62258	Q12955	Q13492	Q13501	Q13625	Q14160	Q15678	Q3V6T2	Q92997	Q969F2	Q96KQ4	Q9BRK4	Q9BV40	Q9BXF6	Q9UKZ4	Q9Y5V3
GO:BP	regulation of gene silencing by miRNA	GO:0060964	8.35766e-05	4.07792	110	247	12	17847	A8CG34	O15504	O75694	P17844	P49790	P49792	P57740	Q8NDV7	Q8WUM0	Q96HA1	Q9BTX1	Q9UGP4
GO:BP	mRNA-containing ribonucleoprotein complex export from nucleus	GO:0071427	9.25705e-05	4.03353	111	247	12	17847	A8CG34	O15504	O75694	P22626	P49790	P49792	P57740	Q6UN15	Q8WUM0	Q92540	Q96HA1	Q9BTX1
GO:BP	mRNA export from nucleus	GO:0006406	9.25705e-05	4.03353	111	247	12	17847	A8CG34	O15504	O75694	P22626	P49790	P49792	P57740	Q6UN15	Q8WUM0	Q92540	Q96HA1	Q9BTX1
GO:BP	endomembrane system organization	GO:0010256	9.61205e-05	4.01718	437	247	23	17847	O14617	O14964	O15027	O75694	P06493	P48729	P50402	Q08379	Q12955	Q13501	Q14789	Q15643	Q5JRA6	Q5JTV8	Q5T5U3	Q86XL3	Q8TBA6	Q92738	Q92783	Q96JH7	Q9H8Y8	Q9NRY6	Q9Y6Y8
GO:BP	regulation of Wnt signaling pathway	GO:0030111	0.000111437	3.95297	371	247	21	17847	A2VDJ0	O14640	O14641	O15169	O60716	P10071	P25054	P48729	P49674	P50402	Q01974	Q13283	Q68DV7	Q92997	Q969F2	Q9BRK4	Q9HC62	Q9NRM7	Q9UGP4	Q9ULK5	Q9UPN3
GO:BP	regulation of posttranscriptional gene silencing	GO:0060147	0.0001132	3.94615	113	247	12	17847	A8CG34	O15504	O75694	P17844	P49790	P49792	P57740	Q8NDV7	Q8WUM0	Q96HA1	Q9BTX1	Q9UGP4
GO:BP	regulation of gene silencing by RNA	GO:0060966	0.0001132	3.94615	113	247	12	17847	A8CG34	O15504	O75694	P17844	P49790	P49792	P57740	Q8NDV7	Q8WUM0	Q96HA1	Q9BTX1	Q9UGP4
GO:BP	Wnt signaling pathway	GO:0016055	0.000147157	3.83222	521	247	25	17847	A2VDJ0	O14640	O14641	O15169	O60716	P10071	P25054	P48729	P49674	P50402	Q01973	Q01974	Q13283	Q68DV7	Q8NDV7	Q8TAA9	Q92997	Q969F2	Q9BRK4	Q9HC62	Q9NRM7	Q9UGP4	Q9ULK5	Q9UPN3	Q9UPQ9
GO:BP	cell-cell signaling by wnt	GO:0198738	0.000158394	3.80026	523	247	25	17847	A2VDJ0	O14640	O14641	O15169	O60716	P10071	P25054	P48729	P49674	P50402	Q01973	Q01974	Q13283	Q68DV7	Q8NDV7	Q8TAA9	Q92997	Q969F2	Q9BRK4	Q9HC62	Q9NRM7	Q9UGP4	Q9ULK5	Q9UPN3	Q9UPQ9
GO:BP	intracellular transport of virus	GO:0075733	0.000169227	3.77153	57	247	9	17847	A8CG34	O15504	O75694	P49790	P49792	P57740	Q8WUM0	Q96HA1	Q9BTX1
GO:BP	transport of virus	GO:0046794	0.000268217	3.57151	60	247	9	17847	A8CG34	O15504	O75694	P49790	P49792	P57740	Q8WUM0	Q96HA1	Q9BTX1
GO:BP	regulation of cellular response to heat	GO:1900034	0.000279318	3.5539	79	247	10	17847	A8CG34	O15504	O75694	P49790	P49792	P57740	P62258	Q8WUM0	Q96HA1	Q9BTX1
GO:BP	viral life cycle	GO:0019058	0.000378051	3.42245	330	247	19	17847	A8CG34	O15504	O60858	O75694	P06493	P07237	P17844	P27105	P29317	P49790	P49792	P57740	Q7Z2W4	Q8WUM0	Q92738	Q96HA1	Q9BTX1	Q9BV40	Q9H6S0
GO:BP	organic substance transport	GO:0071702	0.000433346	3.36317	2893	247	72	17847	A8CG34	O00161	O00213	O14617	O14964	O15027	O15504	O75694	O95486	O95487	O95819	P09651	P10071	P11021	P14625	P22626	P27105	P27824	P49757	P49790	P49792	P50402	P51991	P57740	P62081	P62258	Q07666	Q08379	Q12955	Q14008	Q14160	Q14C86	Q15643	Q15678	Q15811	Q5HYI8	Q5JRA6	Q6UN15	Q7Z3T8	Q7Z7G8	Q8N6T3
GO:BP	cellular component assembly	GO:0022607	0.000489725	3.31005	3017	247	74	17847	A0A2R8YDH4	A2RUB1	A5YKK6	O00161	O14639	O14640	O14964	O15027	O15169	O43809	O60716	O95486	O95487	O95819	P06493	P07237	P09234	P14625	P25054	P27105	P29317	P48729	P49674	P49790	P51617	P55209	P57740	P62258	P62304	Q07157	Q07666	Q08379	Q12955	Q13283	Q13492	Q13501	Q14008	Q14596	Q15643	Q15654	Q16625
GO:BP	ribonucleoprotein complex export from nucleus	GO:0071426	0.000492986	3.30717	129	247	12	17847	A8CG34	O15504	O75694	P22626	P49790	P49792	P57740	Q6UN15	Q8WUM0	Q92540	Q96HA1	Q9BTX1
GO:BP	ribonucleoprotein complex localization	GO:0071166	0.000536536	3.2704	130	247	12	17847	A8CG34	O15504	O75694	P22626	P49790	P49792	P57740	Q6UN15	Q8WUM0	Q92540	Q96HA1	Q9BTX1
GO:BP	organelle organization	GO:0006996	0.000564284	3.2485	3920	247	89	17847	A2RUB1	A5YKK6	O00161	O00213	O14497	O14617	O14639	O14640	O14964	O15027	O15061	O75182	O75410	O75694	O95425	O95486	O95487	P06493	P08670	P09651	P14625	P22626	P25054	P33981	P46013	P48729	P49674	P49790	P50402	P55209	P57740	P62258	Q08379	Q12955	Q13283	Q13492	Q13501	Q13625	Q14008	Q14789	Q15643
GO:BP	Golgi vesicle transport	GO:0048193	0.000609654	3.21492	375	247	20	17847	O00161	O14617	O15027	O95486	O95487	Q08379	Q12955	Q14789	Q5JRA6	Q8N6T3	Q8TBA6	Q969F2	Q96A65	Q96KG9	Q9BV40	Q9NP61	Q9NZ52	Q9UPN3	Q9Y4L1	Q9Y6Y8
GO:BP	beta-catenin destruction complex disassembly	GO:1904886	0.000628192	3.20191	21	247	6	17847	O14640	O14641	O15169	P25054	P48729	Q92997
GO:BP	cellular response to heat	GO:0034605	0.000809986	3.09152	135	247	12	17847	A8CG34	O15504	O75694	P11021	P49790	P49792	P51617	P57740	P62258	Q8WUM0	Q96HA1	Q9BTX1
GO:BP	regulation of cellular localization	GO:0060341	0.00101563	2.99327	918	247	33	17847	O14640	O15027	O95487	O95819	P06493	P10071	P25054	P27105	P29317	P49674	P49757	P49790	P50402	P62258	Q07666	Q12955	Q13492	Q13501	Q13625	Q14160	Q15678	Q3V6T2	Q8TEW0	Q92997	Q969F2	Q96KQ4	Q99767	Q9BRK4	Q9BV40	Q9BXF6	U3KPZ7	Q9UKZ4	Q9Y5V3
GO:BP	posttranscriptional regulation of gene expression	GO:0010608	0.00124061	2.90636	837	247	31	17847	A2RUB1	A5YKK6	A8CG34	O15504	O43809	O75694	P08670	P17844	P22626	P42694	P43243	P49790	P49792	P52272	P57740	P98175	Q07666	Q17RY0	Q6Y7W6	Q8IZH2	Q8NDV7	Q8WUM0	Q92616	Q96HA1	Q96T21	Q99700	Q9BTX1	Q9HCM4	Q9NRA8	Q9UGP4	Q9UPQ9
GO:BP	Golgi organization	GO:0007030	0.0012969	2.88709	141	247	12	17847	O15027	P06493	P48729	Q08379	Q14789	Q15643	Q5T5U3	Q8TBA6	Q92738	Q96JH7	Q9H8Y8	Q9Y6Y8
GO:BP	multi-organism localization	GO:1902579	0.00133672	2.87396	72	247	9	17847	A8CG34	O15504	O75694	P49790	P49792	P57740	Q8WUM0	Q96HA1	Q9BTX1
GO:BP	multi-organism transport	GO:0044766	0.00133672	2.87396	72	247	9	17847	A8CG34	O15504	O75694	P49790	P49792	P57740	Q8WUM0	Q96HA1	Q9BTX1
GO:BP	membrane organization	GO:0061024	0.00135764	2.86721	885	247	32	17847	O00161	O14617	O14640	O14641	O14964	O15027	O75694	O95486	O95487	P06493	P50402	P62258	Q08379	Q12955	Q13492	Q13625	Q14C86	Q15811	Q3V6T2	Q53EZ4	Q5JRA6	Q5JTV8	Q86XL3	Q92783	Q969F2	Q96JH7	Q96KQ4	Q9BV40	Q9C026	Q9NP61	Q9NRY6	Q9Y6Y8
GO:BP	negative regulation of biological process	GO:0048519	0.00141628	2.84885	5596	247	114	17847	A2RUB1	A2VDJ0	A5YKK6	A8CG34	O00213	O14497	O14640	O14641	O14776	O14964	O15169	O15504	O60716	O60858	O75113	O75182	O75694	O95819	P06493	P08670	P09651	P10071	P11021	P14625	P17844	P22626	P25054	P29317	P33981	P42694	P48729	P49069	P49757	P49790	P49792	P50402	P50454	P51617	P52272	P57740	P62081
GO:BP	vesicle targeting	GO:0006903	0.001462	2.83505	94	247	10	17847	O00161	O15027	O95486	O95487	Q08379	Q14160	Q15643	Q96A65	Q9NP61	Q9Y6Y8
GO:BP	hippo signaling	GO:0035329	0.00162905	2.78807	38	247	7	17847	O14641	P62258	Q07157	Q4VCS5	Q8TDM6	Q9NRM7	Q9UGP4
GO:BP	organelle localization	GO:0051640	0.00166631	2.77825	634	247	26	17847	A2RUB1	O00161	O14617	O15027	O95486	O95487	P06493	P49674	P49792	P62258	Q08379	Q13492	Q14008	Q14160	Q15643	Q5SNT2	Q5T5U3	Q7Z4H7	Q8NHV4	Q8TCU4	Q8TEW0	Q96A65	Q9BSJ8	Q9BV40	Q9NP61	Q9Y6Y8
GO:BP	protein localization to membrane	GO:0072657	0.00176767	2.7526	636	247	26	17847	O14617	O14640	O14964	O15027	O75694	P11021	P27105	P29317	P49757	P62081	P62258	Q12955	Q13492	Q13501	Q13625	Q14160	Q8TEW0	Q92953	Q969F2	Q96A65	Q96KQ4	Q9BV40	Q9H8Y8	Q9NZ52	Q9UPN3	Q9Y2G0
GO:BP	nuclear pore organization	GO:0006999	0.00183677	2.73595	14	247	5	17847	P49790	P57740	Q8WUM0	Q8WYP5	Q9BTX1
GO:BP	regulation of establishment of planar polarity involved in neural tube closure	GO:0090178	0.00183677	2.73595	14	247	5	17847	O14640	O14641	O95487	Q92997	Q9ULK5
GO:BP	regulation of gene silencing	GO:0060968	0.00251545	2.59938	150	247	12	17847	A8CG34	O15504	O75694	P17844	P49790	P49792	P57740	Q8NDV7	Q8WUM0	Q96HA1	Q9BTX1	Q9UGP4
GO:BP	neural plate morphogenesis	GO:0001839	0.00252716	2.59737	7	247	4	17847	O14640	O14641	Q9HCM4	Q9ULK5
GO:BP	establishment of planar polarity involved in neural tube closure	GO:0090177	0.00272409	2.56478	15	247	5	17847	O14640	O14641	O95487	Q92997	Q9ULK5
GO:BP	regulation of glycolytic process	GO:0006110	0.00297155	2.52702	79	247	9	17847	A8CG34	O15504	O75694	P49790	P49792	P57740	Q8WUM0	Q96HA1	Q9BTX1
GO:BP	cell surface receptor signaling pathway involved in cell-cell signaling	GO:1905114	0.00417799	2.37903	624	247	25	17847	A2VDJ0	O14640	O14641	O15169	O60716	P10071	P25054	P48729	P49674	P50402	Q01973	Q01974	Q13283	Q68DV7	Q8NDV7	Q8TAA9	Q92997	Q969F2	Q9BRK4	Q9HC62	Q9NRM7	Q9UGP4	Q9ULK5	Q9UPN3	Q9UPQ9
GO:BP	cellular component biogenesis	GO:0044085	0.00458125	2.33902	3253	247	75	17847	A0A2R8YDH4	A2RUB1	A5YKK6	O00161	O14639	O14640	O14964	O15027	O15169	O43809	O60716	O95486	O95487	O95819	P06493	P07237	P09234	P14625	P25054	P27105	P29317	P48729	P49674	P49790	P51617	P55209	P57740	P62081	P62258	P62304	Q07157	Q07666	Q08379	Q12955	Q13283	Q13492	Q13501	Q14008	Q14596	Q15643	Q15654
GO:BP	nucleus organization	GO:0006997	0.00472009	2.32605	132	247	11	17847	O75694	P06493	P49790	P50402	P57740	Q5JTV8	Q86XL3	Q8WUM0	Q8WYP5	Q9BTX1	Q9Y2U8
GO:BP	cellular response to stress	GO:0033554	0.00538553	2.26877	2064	247	54	17847	A2RUB1	A5YKK6	A8CG34	O00213	O14641	O15027	O15169	O15504	O60858	O75694	O95819	P06493	P07237	P09651	P11021	P14625	P17844	P25054	P27824	P29317	P30101	P49674	P49790	P49792	P51617	P52272	P57740	P62258	Q01974	Q13501	Q14596	Q15084	Q17RY0	Q6NSI4	Q6NZ36	Q6Y7W6	Q7Z6J0	Q8N5C8	Q8N6T3	Q8NDV7	Q8WUM0
GO:BP	neural plate elongation	GO:0014022	0.00545675	2.26307	3	247	3	17847	O14640	O14641	Q9ULK5
GO:BP	convergent extension involved in neural plate elongation	GO:0022007	0.00545675	2.26307	3	247	3	17847	O14640	O14641	Q9ULK5
GO:BP	establishment of planar polarity of embryonic epithelium	GO:0042249	0.00548747	2.26063	17	247	5	17847	O14640	O14641	O95487	Q92997	Q9ULK5
GO:BP	protein-containing complex localization	GO:0031503	0.00601256	2.22094	289	247	16	17847	A8CG34	O14617	O15504	O75694	P22626	P49757	P49790	P49792	P57740	Q14160	Q15643	Q6UN15	Q8WUM0	Q92540	Q96HA1	Q9BTX1
GO:BP	regulation of canonical Wnt signaling pathway	GO:0060828	0.0071749	2.14418	293	247	16	17847	A2VDJ0	O14640	O14641	O15169	O60716	P10071	P25054	P48729	P50402	Q01974	Q13283	Q92997	Q969F2	Q9BRK4	Q9NRM7	Q9UGP4
GO:BP	regulation of carbohydrate catabolic process	GO:0043470	0.00740427	2.13052	88	247	9	17847	A8CG34	O15504	O75694	P49790	P49792	P57740	Q8WUM0	Q96HA1	Q9BTX1
GO:BP	regulation of epithelial tube formation	GO:1905276	0.00751244	2.12422	18	247	5	17847	O14640	O14641	O95487	Q92997	Q9ULK5
GO:BP	nuclear pore complex assembly	GO:0051292	0.0089009	2.05057	9	247	4	17847	P49790	P57740	Q8WYP5	Q9BTX1
GO:BP	viral process	GO:0016032	0.00974609	2.01117	832	247	29	17847	A8CG34	O15504	O60858	O75694	P06493	P07237	P08670	P09651	P17844	P27105	P29317	P49069	P49790	P49792	P51617	P57740	P62081	P62258	Q12986	Q13283	Q14160	Q15811	Q7Z2W4	Q8WUM0	Q92738	Q96HA1	Q9BTX1	Q9BV40	Q9H6S0
GO:BP	canonical Wnt signaling pathway	GO:0060070	0.0115417	1.93773	340	247	17	17847	A2VDJ0	O14640	O14641	O15169	O60716	P10071	P25054	P48729	P49674	P50402	Q01974	Q13283	Q92997	Q969F2	Q9BRK4	Q9NRM7	Q9UGP4
GO:BP	symbiotic process	GO:0044403	0.0117048	1.93164	886	247	30	17847	A8CG34	O15504	O60716	O60858	O75694	P06493	P07237	P08670	P09651	P17844	P27105	P29317	P49069	P49790	P49792	P51617	P57740	P62081	P62258	Q12986	Q13283	Q14160	Q15811	Q7Z2W4	Q8WUM0	Q92738	Q96HA1	Q9BTX1	Q9BV40	Q9H6S0
GO:BP	response to heat	GO:0009408	0.011881	1.92515	174	247	12	17847	A8CG34	O15504	O75694	P11021	P49790	P49792	P51617	P57740	P62258	Q8WUM0	Q96HA1	Q9BTX1
GO:BP	regulation of ATP metabolic process	GO:1903578	0.0127195	1.89553	119	247	10	17847	A8CG34	O15504	O75694	P06493	P49790	P49792	P57740	Q8WUM0	Q96HA1	Q9BTX1
GO:BP	pore complex assembly	GO:0046931	0.0132895	1.87649	20	247	5	17847	P49790	P57740	Q6IQ23	Q8WYP5	Q9BTX1
GO:BP	neural plate development	GO:0001840	0.0146735	1.83346	10	247	4	17847	O14640	O14641	Q9HCM4	Q9ULK5
GO:BP	protein folding in endoplasmic reticulum	GO:0034975	0.0146735	1.83346	10	247	4	17847	P11021	P14625	P27824	P30101
GO:BP	protein localization to organelle	GO:0033365	0.0165917	1.78011	949	247	31	17847	A8CG34	O14617	O14640	O14964	O15027	O75694	P06493	P10071	P11021	P25054	P33981	P49757	P49790	P49792	P57740	P62081	P62258	Q13625	Q14160	Q14789	Q3V6T2	Q5JRA6	Q5JTV8	Q7Z3T8	Q8NHV4	Q8WUM0	Q96HA1	Q96KQ4	Q9BRK4	Q9NZ52	Q9Y5V3
GO:BP	regulation of protein localization	GO:0032880	0.0170498	1.76828	1046	247	33	17847	O00213	O14640	O15027	O95486	O95819	P06493	P10071	P25054	P27105	P29317	P49674	P49757	P50402	P62258	Q12955	Q13492	Q13501	Q13625	Q14160	Q14C86	Q15678	Q3V6T2	Q8NEV8	Q8WZ42	Q92997	Q969F2	Q96KQ4	Q9BRK4	Q9BV40	Q9BXF6	Q9HCM4	Q9UKZ4	Q9Y5V3
GO:BP	localization	GO:0051179	0.0181217	1.7418	6824	247	128	17847	A2RUB1	A8CG34	O00161	O00213	O14497	O14617	O14640	O14641	O14964	O15027	O15504	O75694	O95210	O95486	O95487	O95819	P06493	P09651	P10071	P11021	P14625	Q16720	P22626	P25054	P27105	P27824	P29317	P33981	P46939	P49674	P49757	P49790	P49792	P50402	P51991	P55011	P57740	P62081	P62258	P62304	Q01974
GO:BP	regulation of signal transduction	GO:0009966	0.0215583	1.66638	3209	247	72	17847	A2VDJ0	A5YKK6	A7KAX9	O14640	O14641	O14654	O14964	O15169	O60716	O60858	O95819	P06493	P07237	P10071	P11021	P17844	P25054	P29317	P30101	P33981	P48729	P49674	P50402	P51617	P62081	P62258	Q01973	Q01974	Q07666	Q12923	Q13283	Q13370	Q13501	Q13625	Q14160	Q14596	Q15208	Q15654	Q15811	Q4VCS5	Q53EZ4
GO:BP	regulation of neuron projection arborization	GO:0150011	0.0228078	1.64192	11	247	4	17847	O14640	O14641	Q92997	Q9UPN3
GO:BP	regulation of phosphorylation	GO:0042325	0.024347	1.61355	1626	247	44	17847	A8CG34	O14640	O14641	O14964	O15169	O15504	O75694	O95819	P06493	P25054	P29317	P33981	P49790	P49792	P51617	P57740	Q01973	Q01974	Q12923	Q13501	Q14596	Q15208	Q15811	Q3V6T2	Q7Z6J0	Q86XL3	Q8N5C8	Q8TEW0	Q8WU20	Q8WUM0	Q8WZ42	Q92616	Q92997	Q96A49	Q96HA1	Q96J84	Q9BTX1	Q9HC62	Q9NRM7	Q9NYJ8	Q9UKZ4
GO:BP	vesicle budding from membrane	GO:0006900	0.0293884	1.53182	104	247	9	17847	O14617	O15027	O95486	O95487	Q08379	Q13492	Q5JRA6	Q9NP61	Q9Y6Y8
GO:BP	cell junction organization	GO:0034330	0.0314193	1.5028	293	247	15	17847	O60716	O95819	P25054	P29317	P49757	Q07157	Q15654	Q16625	Q6IQ23	Q86UE4	Q8TDM6	Q8TEW0	Q9H792	Q9HCM4	Q9UPN3
GO:BP	vesicle organization	GO:0016050	0.0320404	1.4943	330	247	16	17847	O00161	O14617	O14964	O15027	O95486	O95487	Q08379	Q13492	Q13501	Q5JRA6	Q7Z3T8	Q92783	Q969F2	Q9C026	Q9NP61	Q9Y6Y8
GO:BP	establishment of vesicle localization	GO:0051650	0.0322765	1.49111	192	247	12	17847	O00161	O14617	O15027	O95486	O95487	Q08379	Q13492	Q14160	Q15643	Q96A65	Q9NP61	Q9Y6Y8
GO:BP	interspecies interaction between organisms	GO:0044419	0.0338481	1.47047	936	247	30	17847	A8CG34	O15504	O60716	O60858	O75694	P06493	P07237	P08670	P09651	P17844	P27105	P29317	P49069	P49790	P49792	P51617	P57740	P62081	P62258	Q12986	Q13283	Q14160	Q15811	Q7Z2W4	Q8WUM0	Q92738	Q96HA1	Q9BTX1	Q9BV40	Q9H6S0
GO:BP	regulation of mRNA metabolic process	GO:1903311	0.0345156	1.46198	332	247	16	17847	A2RUB1	A5YKK6	O43809	P08670	P09651	P17844	P22626	P52272	P98175	Q07666	Q6Y7W6	Q7Z2W4	Q8IZH2	Q8NDV7	Q96T21	Q9UPQ9
GO:BP	establishment of localization	GO:0051234	0.0375182	1.42576	5419	247	106	17847	A2RUB1	A8CG34	O00161	O00213	O14497	O14617	O14640	O14964	O15027	O15504	O75694	O95210	O95486	O95487	O95819	P09651	P10071	P11021	P14625	Q16720	P22626	P27105	P27824	P46939	P49757	P49790	P49792	P50402	P51991	P55011	P57740	P62081	P62258	P62304	Q07666	Q08379	Q12955	Q13162	Q13492	Q13501	Q13625
GO:BP	neural tube development	GO:0021915	0.0379745	1.42051	164	247	11	17847	O14497	O14640	O14641	O95487	P10071	P29317	P62081	Q14160	Q8WUM0	Q92997	Q9ULK5
GO:BP	regulation of phosphate metabolic process	GO:0019220	0.0433041	1.36347	1827	247	47	17847	A8CG34	O14640	O14641	O14964	O15169	O15504	O75694	O95819	P06493	P14625	P25054	P29317	P33981	P49790	P49792	P51617	P57740	P62258	Q01973	Q01974	Q12923	Q13501	Q14596	Q15208	Q15811	Q3V6T2	Q7Z6J0	Q86XL3	Q8N5C8	Q8TEW0	Q8WU20	Q8WUM0	Q8WZ42	Q92540	Q92616	Q92997	Q96A49	Q96HA1	Q96J84	Q9BTX1	Q9HC62
GO:BP	regulation of phosphorus metabolic process	GO:0051174	0.0445328	1.35132	1829	247	47	17847	A8CG34	O14640	O14641	O14964	O15169	O15504	O75694	O95819	P06493	P14625	P25054	P29317	P33981	P49790	P49792	P51617	P57740	P62258	Q01973	Q01974	Q12923	Q13501	Q14596	Q15208	Q15811	Q3V6T2	Q7Z6J0	Q86XL3	Q8N5C8	Q8TEW0	Q8WU20	Q8WUM0	Q8WZ42	Q92540	Q92616	Q92997	Q96A49	Q96HA1	Q96J84	Q9BTX1	Q9HC62
GO:BP	planar cell polarity pathway involved in neural tube closure	GO:0090179	0.0483494	1.31561	13	247	4	17847	O14640	O14641	Q92997	Q9ULK5
GO:CC	cell junction	GO:0030054	4.37e-12	11.3599	1312	251	55	18842	A0A2R8YDH4	A6NKD9	A7KAX9	O00161	O15061	O60716	O95425	O95819	P07237	P08670	P11021	P14625	P25054	P29317	P30101	P46939	P49757	P62081	P62258	Q07157	Q12955	Q13283	Q13625	Q14160	Q15654	Q15811	Q16625	Q17RY0	Q4VCS5	Q5T5U3	Q6IQ23	Q6NZ36	Q6T4R5	Q6XZF7	Q86UE4	Q8TDM6	Q8TEW0	Q8WU20	Q93052	Q96A49	Q96J84
GO:CC	cytoplasm	GO:0005737	4.54e-11	10.343	11620	251	208	18842	A2RUB1	A2VDJ0	A5YKK6	A7KAX9	A8CG34	O00161	O00213	O14617	O14639	O14640	O14641	O14654	O14964	O15027	O15061	O15169	O15504	O43809	O60716	O60858	O75182	O75410	O95210	O95425	O95486	O95487	O95819	P06493	P07237	P08670	P09651	P10071	P11021	P14625	P17844	Q16720	P22626	P25054	P27105	P27824	P30101
GO:CC	anchoring junction	GO:0070161	2.27e-10	9.64463	561	251	33	18842	O00161	O15061	O60716	O95425	O95819	P07237	P08670	P11021	P14625	P25054	P29317	P30101	P49757	P62081	P62258	Q07157	Q13283	Q14160	Q15654	Q6IQ23	Q6T4R5	Q8TDM6	Q8TEW0	Q8WU20	Q93052	Q99618	Q9H307	Q9H792	Q9HCM4	Q9NR12	Q9UGI8	Q9UGP4	Q9Y4L1
GO:CC	intracellular organelle	GO:0043229	2.94e-10	9.5313	12818	251	219	18842	A2RUB1	A2VDJ0	A5YKK6	A7KAX9	A8CG34	O00161	O00213	O14497	O14617	O14639	O14640	O14641	O14776	O14964	O15027	O15061	O15169	O15504	O43809	O60716	O60858	O75113	O75182	O75410	O75694	O95210	O95425	O95486	O95487	P06493	P07237	P08670	P09234	P09651	P10071	P11021	P14625	P17844	Q16720	P22626	P25054
GO:CC	adherens junction	GO:0005912	5.73e-10	9.24172	546	251	32	18842	O00161	O15061	O60716	O95425	O95819	P07237	P08670	P11021	P14625	P25054	P29317	P30101	P49757	P62081	P62258	Q07157	Q13283	Q14160	Q15654	Q6IQ23	Q6T4R5	Q8TDM6	Q8TEW0	Q8WU20	Q93052	Q99618	Q9H792	Q9HCM4	Q9NR12	Q9UGI8	Q9UGP4	Q9Y4L1
GO:CC	endomembrane system	GO:0012505	1.43e-09	8.84442	4490	251	109	18842	A2VDJ0	A7KAX9	A8CG34	O00161	O14617	O14964	O15027	O15504	O60858	O75694	O95210	O95486	O95487	P06493	P07237	P11021	P14625	Q16720	P27105	P27824	P30101	P43243	P49069	P49757	P49790	P49792	P50402	P50454	P50851	P51617	P51648	P57740	Q08379	Q12955	Q13162	Q13370	Q13492	Q13501	Q14596	Q14739	Q14789
GO:CC	cytoskeleton	GO:0005856	2.14e-09	8.66981	2221	251	69	18842	A7KAX9	O14639	O14640	O15061	O43809	O75410	O95425	P06493	P08670	P10071	P25054	P27105	P33981	P46939	P48729	P50402	P62081	P62258	Q01973	Q01974	Q07157	Q08379	Q12923	Q12955	Q14008	Q15643	Q15654	Q15678	Q15811	Q3V6T2	Q3YEC7	Q4VCS5	Q53EZ4	Q5SNT2	Q5T5U3	Q5T5Y3	Q6IQ23	Q6XZF7	Q7Z4H7	Q8IWC1	Q8NDI1
GO:CC	intracellular organelle part	GO:0044446	6.09e-08	7.21519	9699	251	178	18842	A7KAX9	A8CG34	O00161	O00213	O14497	O14617	O14639	O14640	O14641	O14776	O14964	O15027	O15061	O15504	O43809	O60858	O75113	O75182	O75410	O75694	O95210	O95425	O95486	O95487	P06493	P07237	P08670	P09234	P09651	P10071	P11021	P14625	P17844	P22626	P25054	P27105	P27824	P30101	P33981	P43243	P46013
GO:CC	cytosol	GO:0005829	6.6e-08	7.1807	5086	251	114	18842	A5YKK6	A7KAX9	O14640	O14641	O14654	O14964	O15027	O15169	O15504	O60716	O95210	O95425	O95486	O95487	P06493	P08670	P10071	P11021	P14625	P25054	P42694	P48729	P49674	P49790	P49792	P49914	P51617	P52655	P57740	P62081	P62258	P62304	Q07157	Q07666	Q12955	Q12986	Q13162	Q13283	Q13370	Q13492	Q13501
GO:CC	intracellular part	GO:0044424	1.01e-07	6.99724	14552	251	231	18842	A2RUB1	A2VDJ0	A5YKK6	A7KAX9	A8CG34	O00161	O00213	O14497	O14617	O14639	O14640	O14641	O14654	O14776	O14964	O15027	O15061	O15169	O15504	O43809	O60716	O60858	O75113	O75182	O75410	O75694	O95210	O95425	O95486	O95487	O95819	P06493	P07237	P08670	P09234	P09651	P10071	P11021	P14625	P17844	Q16720
GO:CC	organelle	GO:0043226	1.64e-07	6.78517	13667	251	222	18842	A2RUB1	A2VDJ0	A5YKK6	A7KAX9	A8CG34	O00161	O00213	O14497	O14617	O14639	O14640	O14641	O14776	O14964	O15027	O15061	O15169	O15504	O43809	O60716	O60858	O75113	O75182	O75410	O75694	O75976	O95210	O95425	O95486	O95487	P06493	P07237	P08670	P09234	P09651	P10071	P11021	P14625	P17844	Q16720	P22626
GO:CC	nuclear membrane	GO:0031965	1.65e-07	6.78166	298	251	21	18842	A8CG34	O15504	O75694	P43243	P49790	P49792	P50402	P57740	Q14739	Q5JTV8	Q5SNT2	Q86UE4	Q8N5G2	Q8WUM0	Q8WYP5	Q96HA1	Q96RT1	Q9BTX1	Q9HC62	Q9UM54	Q9Y2U8
GO:CC	intracellular	GO:0005622	1.66e-07	6.77944	14596	251	231	18842	A2RUB1	A2VDJ0	A5YKK6	A7KAX9	A8CG34	O00161	O00213	O14497	O14617	O14639	O14640	O14641	O14654	O14776	O14964	O15027	O15061	O15169	O15504	O43809	O60716	O60858	O75113	O75182	O75410	O75694	O95210	O95425	O95486	O95487	O95819	P06493	P07237	P08670	P09234	P09651	P10071	P11021	P14625	P17844	Q16720
GO:CC	non-membrane-bounded organelle	GO:0043228	1.99e-07	6.70177	4913	251	110	18842	A5YKK6	A7KAX9	O14497	O14639	O14640	O15061	O43809	O60716	O75113	O75182	O75410	O95425	P06493	P08670	P10071	P17844	P22626	P25054	P27105	P27824	P33981	P42694	P46013	P46939	P48729	P49790	P50402	P51617	P51991	P52272	P57740	P62081	P62258	Q01973	Q01974	Q07157	Q08379	Q12923	Q12955	Q12986	Q13283
GO:CC	nuclear envelope	GO:0005635	2.68e-07	6.57242	470	251	26	18842	A8CG34	O15504	O75694	P43243	P49790	P49792	P50402	P57740	Q14739	Q15811	Q5JTV8	Q5SNT2	Q68DV7	Q86UE4	Q8N5G2	Q8WUM0	Q8WYP5	Q92575	Q96HA1	Q96RT1	Q9BTX1	Q9HC62	Q9NXE4	Q9UM54	Q9Y217	Q9Y2U8
GO:CC	organelle part	GO:0044422	2.9e-07	6.53775	10009	251	180	18842	A7KAX9	A8CG34	O00161	O00213	O14497	O14617	O14639	O14640	O14641	O14776	O14964	O15027	O15061	O15504	O43809	O60716	O60858	O75113	O75182	O75410	O75694	O95210	O95425	O95486	O95487	P06493	P07237	P08670	P09234	P09651	P10071	P11021	P14625	P17844	P22626	P25054	P27105	P27824	P30101	P33981	P43243
GO:CC	cytoplasmic part	GO:0044444	6e-07	6.22191	9760	251	176	18842	A2VDJ0	A5YKK6	A7KAX9	A8CG34	O00161	O00213	O14617	O14640	O14641	O14654	O14964	O15027	O15061	O15169	O15504	O60716	O60858	O95210	O95425	O95486	O95487	P06493	P07237	P08670	P10071	P11021	P14625	Q16720	P25054	P27105	P27824	P30101	P42694	P46939	P48729	P49069	P49674	P49757	P49790	P49792	P49914
GO:CC	intracellular non-membrane-bounded organelle	GO:0043232	8.89e-07	6.05128	4904	251	108	18842	A5YKK6	A7KAX9	O14497	O14639	O14640	O15061	O43809	O75113	O75182	O75410	O95425	P06493	P08670	P10071	P17844	P22626	P25054	P27105	P27824	P33981	P42694	P46013	P46939	P48729	P49790	P50402	P51617	P51991	P52272	P57740	P62081	P62258	Q01973	Q01974	Q07157	Q08379	Q12923	Q12955	Q12986	Q13283	Q13501
GO:CC	cell-cell junction	GO:0005911	1.06904e-06	5.97101	466	251	25	18842	A0A2R8YDH4	A6NKD9	O00161	O60716	P25054	P29317	Q07157	Q12955	Q14160	Q16625	Q4VCS5	Q6IQ23	Q6T4R5	Q6XZF7	Q86UE4	Q8TDM6	Q8TEW0	Q8WU20	Q96J84	Q99618	Q9H307	Q9H329	Q9NR12	Q9UGP4	Q9ULK5
GO:CC	membrane	GO:0016020	1.61887e-06	5.79079	9701	251	174	18842	A2VDJ0	A5YKK6	A7KAX9	A8CG34	O00161	O00213	O14617	O14640	O14641	O14654	O14964	O15027	O15061	O15169	O15504	O60716	O60858	O75410	O75694	O75976	O95210	O95425	O95486	O95487	P06493	P07237	P08670	P09651	P11021	P14625	P17844	Q16720	P22626	P25054	P27105	P27824	P29317	P30101	P33981	P42694	P43243
GO:CC	cell-substrate junction	GO:0030055	2.11318e-06	5.67506	411	251	23	18842	O00161	O95425	O95819	P07237	P08670	P11021	P14625	P29317	P30101	P49757	P62081	P62258	Q13283	Q15654	Q6T4R5	Q93052	Q96RT1	Q9H792	Q9HCM4	Q9NR12	Q9UGI8	Q9UGP4	Q9Y4L1
GO:CC	focal adhesion	GO:0005925	7.09028e-06	5.14934	403	251	22	18842	O00161	O95425	O95819	P07237	P08670	P11021	P14625	P29317	P30101	P49757	P62081	P62258	Q13283	Q15654	Q6T4R5	Q93052	Q9H792	Q9HCM4	Q9NR12	Q9UGI8	Q9UGP4	Q9Y4L1
GO:CC	cell-substrate adherens junction	GO:0005924	8.09174e-06	5.09196	406	251	22	18842	O00161	O95425	O95819	P07237	P08670	P11021	P14625	P29317	P30101	P49757	P62081	P62258	Q13283	Q15654	Q6T4R5	Q93052	Q9H792	Q9HCM4	Q9NR12	Q9UGI8	Q9UGP4	Q9Y4L1
GO:CC	cytoskeletal part	GO:0044430	8.51659e-06	5.06973	1707	251	51	18842	O14639	O14640	O15061	O43809	O75410	O95425	P06493	P08670	P10071	P25054	P33981	P46939	P48729	P50402	P62081	P62258	Q01973	Q01974	Q07157	Q08379	Q14008	Q15654	Q3V6T2	Q3YEC7	Q4VCS5	Q53EZ4	Q5SNT2	Q5T5Y3	Q6IQ23	Q7Z4H7	Q8IWC1	Q8NDI1	Q8NHV4	Q8TCU4	Q8TDM6	Q8WZ42	Q93052	Q96AY4	Q96DN5	Q96KG9	Q9BR77
GO:CC	nuclear pore	GO:0005643	1.10506e-05	4.95662	92	251	11	18842	A8CG34	O15504	O75694	P49790	P49792	P57740	Q8WUM0	Q8WYP5	Q96HA1	Q9BTX1	Q9HC62
GO:CC	cytoplasmic vesicle	GO:0031410	1.90167e-05	4.72086	2346	251	62	18842	A7KAX9	O00161	O14617	O14640	O14641	O14964	O15027	O15169	O95210	O95486	O95487	P07237	P08670	P11021	P14625	P27105	P27824	P30101	P49757	P51617	P55209	P62258	Q01974	Q08379	Q13162	Q13492	Q13501	Q14596	Q14C86	Q15084	Q15643	Q15811	Q16625	Q3V6T2	Q4VCS5	Q5T5U3	Q6Y7W6	Q7Z3T8	Q8IVF2	Q8N5C8	Q8NDI1
GO:CC	lateral plasma membrane	GO:0016328	1.94961e-05	4.71005	58	251	9	18842	O14640	O14641	O15169	P25054	Q12955	Q16625	Q8TAA9	Q969F2	Q9ULK5
GO:CC	intracellular vesicle	GO:0097708	1.99267e-05	4.70056	2349	251	62	18842	A7KAX9	O00161	O14617	O14640	O14641	O14964	O15027	O15169	O95210	O95486	O95487	P07237	P08670	P11021	P14625	P27105	P27824	P30101	P49757	P51617	P55209	P62258	Q01974	Q08379	Q13162	Q13492	Q13501	Q14596	Q14C86	Q15084	Q15643	Q15811	Q16625	Q3V6T2	Q4VCS5	Q5T5U3	Q6Y7W6	Q7Z3T8	Q8IVF2	Q8N5C8	Q8NDI1
GO:CC	apical junction complex	GO:0043296	2.27386e-05	4.64324	146	251	13	18842	A0A2R8YDH4	A6NKD9	O60716	P25054	Q07157	Q12955	Q16625	Q4VCS5	Q6IQ23	Q6T4R5	Q86UE4	Q8TEW0	Q9H329
GO:CC	endoplasmic reticulum chaperone complex	GO:0034663	2.71773e-05	4.56579	10	251	5	18842	P07237	P11021	P14625	Q15084	Q9Y4L1
GO:CC	nuclear body	GO:0016604	3.85611e-05	4.41385	768	251	30	18842	O00213	O14641	O43809	O75113	P09234	P10071	P22626	P46013	P48729	P52272	P61956	P98175	Q13501	Q14596	Q14966	Q15643	Q6NZ36	Q6T4R5	Q7Z417	Q7Z4H7	Q86UE4	Q96PK6	Q96RT1	Q9C0C9	Q9H307	Q9H3U1	Q9HC62	Q9NRA8	Q9UGU0	Q9UKZ4
GO:CC	tight junction	GO:0070160	5.30125e-05	4.27562	131	251	12	18842	A0A2R8YDH4	A6NKD9	P25054	P29317	Q07157	Q12955	Q16625	Q4VCS5	Q6T4R5	Q86UE4	Q8TEW0	Q9H329
GO:CC	cell-cell adherens junction	GO:0005913	0.000133113	3.87578	117	251	11	18842	O00161	O60716	P25054	Q07157	Q14160	Q6IQ23	Q8TDM6	Q8TEW0	Q8WU20	Q99618	Q9NR12
GO:CC	host cell	GO:0043657	0.00018885	3.72388	75	251	9	18842	A8CG34	O15504	O75694	P49790	P49792	P57740	Q8WUM0	Q96HA1	Q9BTX1
GO:CC	host cellular component	GO:0018995	0.00018885	3.72388	75	251	9	18842	A8CG34	O15504	O75694	P49790	P49792	P57740	Q8WUM0	Q96HA1	Q9BTX1
GO:CC	intracellular membrane-bounded organelle	GO:0043231	0.000199319	3.70045	11036	251	184	18842	A2RUB1	A2VDJ0	A5YKK6	A7KAX9	A8CG34	O00161	O00213	O14497	O14617	O14641	O14776	O14964	O15027	O15169	O15504	O43809	O60716	O60858	O75113	O75182	O75410	O75694	O95210	O95425	O95486	O95487	P06493	P07237	P08670	P09234	P09651	P10071	P11021	P14625	P17844	Q16720	P22626	P25054	P27105	P27824	P30101
GO:CC	bicellular tight junction	GO:0005923	0.000259073	3.58658	125	251	11	18842	A0A2R8YDH4	A6NKD9	P25054	Q07157	Q12955	Q16625	Q4VCS5	Q6T4R5	Q86UE4	Q8TEW0	Q9H329
GO:CC	membrane-bounded organelle	GO:0043227	0.000364221	3.43864	12536	251	201	18842	A2RUB1	A2VDJ0	A5YKK6	A7KAX9	A8CG34	O00161	O00213	O14497	O14617	O14640	O14641	O14776	O14964	O15027	O15169	O15504	O43809	O60716	O60858	O75113	O75182	O75410	O75694	O75976	O95210	O95425	O95486	O95487	P06493	P07237	P08670	P09234	P09651	P10071	P11021	P14625	P17844	Q16720	P22626	P25054	P27105
GO:CC	microtubule cytoskeleton	GO:0015630	0.00054246	3.26563	1211	251	37	18842	O14640	O43809	O75410	O95425	P06493	P25054	P33981	P48729	P50402	P62081	P62258	Q01974	Q08379	Q14008	Q3V6T2	Q3YEC7	Q53EZ4	Q5SNT2	Q5T5Y3	Q6IQ23	Q7Z4H7	Q8IWC1	Q8NDI1	Q8NHV4	Q8TCU4	Q8TDM6	Q96AY4	Q96DN5	Q96KG9	Q9BR77	Q9BRK4	Q9BXF6	Q9H7U1	Q9NRM7	Q9UHD8	Q9UPN3	Q9UPS8
GO:CC	ribonucleoprotein granule	GO:0035770	0.000552855	3.25739	224	251	14	18842	A5YKK6	P42694	P51991	Q13283	Q13501	Q6Y7W6	Q7Z417	Q8IZH2	Q8NDV7	Q99700	Q9H6S0	Q9NRA8	Q9UGP4	Q9UPQ9
GO:CC	coated vesicle	GO:0030135	0.000603024	3.21967	293	251	16	18842	O14640	O14641	O15027	O95486	O95487	P49757	Q01974	Q08379	Q13492	Q3V6T2	Q96KG9	Q9BV40	Q9NP61	Q9ULK5	Q9UM54	Q9Y6Y8
GO:CC	ribonucleoprotein complex	GO:1990904	0.000631249	3.1998	878	251	30	18842	A5YKK6	P08670	P09234	P09651	P17844	P22626	P27824	P42694	P48729	P51991	P52272	P62081	P62304	Q13283	Q13501	Q17RY0	Q6Y7W6	Q7Z417	Q8IZH2	Q8NDV7	Q92540	Q92616	Q96PK6	Q96T21	Q99700	Q9H307	Q9H6S0	Q9NRA8	Q9UGP4	Q9UPQ9
GO:CC	cell leading edge	GO:0031252	0.00074157	3.12985	409	251	19	18842	O00213	O14639	O60716	P08670	P25054	P29317	Q12923	Q14160	Q15811	Q3V6T2	Q4VCS5	Q6T4R5	Q7Z6J0	Q9HB21	Q9HCM4	Q9NR12	Q9UM54	Q9UPN3	Q9Y217
GO:CC	plasma membrane bounded cell projection	GO:0120025	0.000753184	3.1231	2144	251	54	18842	A7KAX9	O00161	O00213	O14617	O14639	O14640	O60716	O95425	P08670	P10071	P25054	P27824	P29317	P46939	P48729	P51991	P62258	Q01973	Q01974	Q12923	Q12955	Q13501	Q14160	Q15643	Q15811	Q17RY0	Q3V6T2	Q4VCS5	Q6T4R5	Q6Y7W6	Q7Z6J0	Q8IZH2	Q8N5G2	Q8NHV4	Q8TCU4	Q8TDM6	Q8TEW0	Q92625	Q92953	Q96A49	Q96A65
GO:CC	cell projection	GO:0042995	0.000928147	3.03238	2216	251	55	18842	A7KAX9	O00161	O00213	O14617	O14639	O14640	O60716	O95425	P08670	P10071	P25054	P27824	P29317	P46939	P48729	P51991	P62258	Q01973	Q01974	Q07157	Q12923	Q12955	Q13501	Q14160	Q15643	Q15811	Q17RY0	Q3V6T2	Q4VCS5	Q6T4R5	Q6Y7W6	Q7Z6J0	Q8IZH2	Q8N5G2	Q8NHV4	Q8TCU4	Q8TDM6	Q8TEW0	Q92625	Q92953	Q96A49
GO:CC	nucleus	GO:0005634	0.0014838	2.82862	7445	251	134	18842	A2RUB1	A5YKK6	A7KAX9	A8CG34	O00161	O00213	O14497	O14641	O14776	O15169	O15504	O43809	O60716	O75113	O75182	O75410	O75694	O95425	P06493	P08670	P09234	P09651	P10071	P11021	P14625	P17844	P22626	P25054	P30101	P33981	P42694	P43243	P46013	P46939	P48729	P49674	P49757	P49790	P49792	P50402	P51617
GO:CC	endoplasmic reticulum-Golgi intermediate compartment	GO:0005793	0.00255081	2.59332	129	251	10	18842	P07237	P11021	P50454	Q08379	Q14789	Q15084	Q15643	Q96KG9	Q9Y217	Q9Y6Y8
GO:CC	nucleoplasm part	GO:0044451	0.00267634	2.57246	1144	251	34	18842	O00213	O14641	O43809	O75113	O75182	P09234	P10071	P22626	P46013	P48729	P52272	P52655	P61956	P98175	Q13501	Q14596	Q14966	Q15643	Q6NZ36	Q6T4R5	Q6UN15	Q7Z417	Q7Z4H7	Q86UE4	Q96PK6	Q96RT1	Q9C0C9	Q9H307	Q9H3U1	Q9HC62	Q9NRA8	Q9UGU0	Q9UKZ4	Q9UM54
GO:CC	melanosome	GO:0042470	0.00319462	2.49558	105	251	9	18842	P07237	P11021	P14625	P27105	P27824	P30101	P55209	P62258	Q15084
GO:CC	pigment granule	GO:0048770	0.00319462	2.49558	105	251	9	18842	P07237	P11021	P14625	P27105	P27824	P30101	P55209	P62258	Q15084
GO:CC	lamellipodium	GO:0030027	0.00352409	2.45295	195	251	12	18842	O00213	O14639	O60716	P25054	P29317	Q12923	Q14160	Q15811	Q3V6T2	Q4VCS5	Q6T4R5	Q7Z6J0
GO:CC	endoplasmic reticulum	GO:0005783	0.00402271	2.39548	1925	251	48	18842	A2VDJ0	A7KAX9	A8CG34	O15027	O60858	O95210	O95486	O95487	P06493	P07237	P11021	P14625	P27105	P27824	P30101	P49069	P50402	P50454	P50851	P51648	Q12955	Q13162	Q13370	Q13501	Q14739	Q15084	Q17RY0	Q3V6T2	Q5JRA6	Q5VV42	Q68DV7	Q6Y7W6	Q86UE4	Q86XL3	Q8N5G2	Q92575	Q92890	Q96HA1	Q96JH7	Q9BSJ8	Q9H6S0
GO:CC	organelle membrane	GO:0031090	0.00466642	2.33102	3500	251	74	18842	A7KAX9	A8CG34	O00161	O14617	O14964	O15027	O15504	O60858	O75694	O95210	O95486	O95487	P06493	P11021	P14625	P27105	P27824	P30101	P43243	P49790	P49792	P50402	P51617	P51648	P57740	Q01974	Q08379	Q13492	Q14739	Q14789	Q15084	Q15643	Q5JRA6	Q5JTV8	Q5SNT2	Q5T5U3	Q5VV42	Q68DV7	Q7Z3T8	Q86UE4	Q86XL3
GO:CC	vesicle	GO:0031982	0.00509427	2.29292	3891	251	80	18842	A7KAX9	O00161	O14617	O14640	O14641	O14964	O15027	O15169	O60716	O75976	O95210	O95486	O95487	P06493	P07237	P08670	P09651	P11021	P14625	P17844	Q16720	P22626	P27105	P27824	P30101	P46939	P49757	P51617	P52272	P55011	P55209	P62258	Q01974	Q08379	Q12923	Q13162	Q13492	Q13501	Q14160	Q14596	Q14C86
GO:CC	Golgi apparatus	GO:0005794	0.00581495	2.23545	1561	251	41	18842	A7KAX9	O14617	O15027	O95486	O95487	Q16720	P50851	Q08379	Q12955	Q13370	Q13492	Q14789	Q15643	Q3V6T2	Q5JRA6	Q5T5U3	Q6T4R5	Q6XZF7	Q6Y7W6	Q7Z6J0	Q8N6T3	Q8NDV7	Q8TBA6	Q92738	Q96A49	Q96JH7	Q96KG9	Q99700	Q9BXF6	Q9H3P7	Q9H3U1	Q9H8Y8	Q9NP61	Q9NXE4	Q9NZ52	Q9UKZ4	Q9ULC8	Q9UM54	Q9UPM8	Q9UPN3	Q9Y6Y8
GO:CC	actin cytoskeleton	GO:0015629	0.00604984	2.21826	517	251	20	18842	A7KAX9	O14639	O95425	P46939	Q01973	Q07157	Q15654	Q15811	Q4VCS5	Q5T5U3	Q8NDI1	Q8WZ42	Q93052	Q9BTX1	Q9H792	Q9NR12	Q9UHD8	Q9ULK5	Q9UM54	Q9UPN3
GO:CC	microtubule organizing center	GO:0005815	0.00721693	2.14165	751	251	25	18842	O43809	O75410	P06493	P25054	P48729	P50402	P62081	Q14008	Q3V6T2	Q3YEC7	Q53EZ4	Q6IQ23	Q7Z4H7	Q8NDI1	Q8NHV4	Q8TCU4	Q8TDM6	Q96AY4	Q96DN5	Q96KG9	Q9BR77	Q9BRK4	Q9BXF6	Q9NRM7	Q9UPS8
GO:CC	cytoplasmic ribonucleoprotein granule	GO:0036464	0.00848345	2.07143	213	251	12	18842	A5YKK6	P42694	Q13283	Q13501	Q6Y7W6	Q7Z417	Q8IZH2	Q8NDV7	Q99700	Q9NRA8	Q9UGP4	Q9UPQ9
GO:CC	perinuclear region of cytoplasm	GO:0048471	0.00864452	2.06326	712	251	24	18842	O00213	O15027	O15169	O60858	O95210	P14625	P25054	P27105	P49792	Q13492	Q13625	Q17RY0	Q7Z6J0	Q86UE4	Q96A49	Q96J84	Q96KQ4	Q99700	Q9BV40	Q9H3U1	Q9UHD8	Q9UKZ4	Q9UM54	Q9Y217
GO:CC	contractile actin filament bundle	GO:0097517	0.00938581	2.02753	68	251	7	18842	O14639	Q01973	Q15654	Q93052	Q9NR12	Q9UHD8	Q9ULK5
GO:CC	stress fiber	GO:0001725	0.00938581	2.02753	68	251	7	18842	O14639	Q01973	Q15654	Q93052	Q9NR12	Q9UHD8	Q9ULK5
GO:CC	cell projection part	GO:0044463	0.00998906	2.00048	1488	251	39	18842	A7KAX9	O00213	O14617	O14640	O60716	P10071	P25054	P27824	P29317	P46939	P48729	P62258	Q01973	Q01974	Q12955	Q13501	Q15811	Q17RY0	Q3V6T2	Q6Y7W6	Q8IZH2	Q8N5G2	Q8NHV4	Q8TDM6	Q8TEW0	Q92953	Q96A49	Q96A65	Q96J84	Q99767	Q9C026	Q9C0B5	Q9C0D5	Q9HB21	Q9HCM4	Q9UHD8	Q9UM54	Q9UPN3	Q9Y217
GO:CC	plasma membrane bounded cell projection part	GO:0120038	0.00998906	2.00048	1488	251	39	18842	A7KAX9	O00213	O14617	O14640	O60716	P10071	P25054	P27824	P29317	P46939	P48729	P62258	Q01973	Q01974	Q12955	Q13501	Q15811	Q17RY0	Q3V6T2	Q6Y7W6	Q8IZH2	Q8N5G2	Q8NHV4	Q8TDM6	Q8TEW0	Q92953	Q96A49	Q96A65	Q96J84	Q99767	Q9C026	Q9C0B5	Q9C0D5	Q9HB21	Q9HCM4	Q9UHD8	Q9UM54	Q9UPN3	Q9Y217
GO:CC	nuclear part	GO:0044428	0.010658	1.97233	4894	251	94	18842	A7KAX9	A8CG34	O00161	O00213	O14497	O14641	O14776	O15504	O43809	O75113	O75182	O75694	P06493	P08670	P09234	P09651	P10071	P11021	P17844	P22626	P25054	P43243	P46013	P46939	P48729	P49674	P49790	P49792	P50402	P51991	P52272	P52655	P61956	P57740	P62081	P62304	P98175	Q07666	Q12923	Q12986	Q13501
GO:CC	neuron part	GO:0097458	0.0107158	1.96997	1771	251	44	18842	A7KAX9	O00161	O00213	O14497	O14617	O14640	O15061	O60716	P08670	Q16720	P27824	P29317	P46939	P51991	P62258	Q01973	Q01974	Q12923	Q12955	Q13283	Q13492	Q13501	Q14160	Q15811	Q17RY0	Q6XZF7	Q6Y7W6	Q8IZH2	Q8N5G2	Q8N6T3	Q8TDM6	Q8TEW0	Q92625	Q92953	Q96A49	Q96A65	Q96J84	Q99767	Q99963	Q9C026	Q9C0B5
GO:CC	actin filament bundle	GO:0032432	0.017756	1.75065	75	251	7	18842	O14639	Q01973	Q15654	Q93052	Q9NR12	Q9UHD8	Q9ULK5
GO:CC	protein-containing complex	GO:0032991	0.0181369	1.74144	5641	251	104	18842	A5YKK6	A8CG34	O00161	O00213	O14497	O14617	O14640	O14964	O15169	O15504	O43809	O60716	O75182	O75420	O75694	O95425	O95486	O95487	P06493	P07237	P08670	P09234	P09651	P10071	P11021	P14625	P17844	P22626	P25054	P27824	P29317	P30101	P33981	P42694	P46939	P48729	P49790	P49792	P50454	P51617	P51991
GO:CC	actomyosin	GO:0042641	0.02686	1.57089	80	251	7	18842	O14639	Q01973	Q15654	Q93052	Q9NR12	Q9UHD8	Q9ULK5
GO:CC	postsynapse	GO:0098794	0.0281373	1.55072	624	251	21	18842	A7KAX9	O00213	O14617	O14640	O60716	P27824	P46939	P51991	Q12955	Q13492	Q14160	Q15811	Q17RY0	Q8N6T3	Q8TDM6	Q96A49	Q96RT1	Q99767	Q99963	Q9C0D5	Q9HAU0
GO:CC	costamere	GO:0043034	0.0287592	1.54122	19	251	4	18842	O15061	O95425	Q12955	Q8IVF2
GO:CC	midbody	GO:0030496	0.0331576	1.47942	174	251	10	18842	O60716	O75410	O95425	P06493	P11021	P14625	Q53EZ4	Q96A65	Q96AY4	Q9BRK4
GO:CC	coated vesicle membrane	GO:0030662	0.0364325	1.43851	176	251	10	18842	O15027	O95486	O95487	Q01974	Q13492	Q96KG9	Q9BV40	Q9NP61	Q9UM54	Q9Y6Y8
GO:CC	catalytic step 2 spliceosome	GO:0071013	0.0366087	1.43642	84	251	7	18842	P09651	P17844	P22626	P51991	P52272	P62304	Q9H307
GO:CC	nuclear outer membrane-endoplasmic reticulum membrane network	GO:0042175	0.0400037	1.3979	1094	251	30	18842	A7KAX9	A8CG34	O15027	O60858	O95210	O95486	O95487	P06493	P11021	P14625	P27824	P30101	P49792	P50402	P51648	Q14739	Q15084	Q5JRA6	Q5VV42	Q68DV7	Q86UE4	Q86XL3	Q8N5G2	Q92575	Q92890	Q96HA1	Q9BSJ8	Q9H8Y8	Q9NXE4	Q9P246
GO:CC	synapse	GO:0045202	0.0433004	1.36351	1206	251	32	18842	A7KAX9	O00161	O00213	O14617	O14640	O60716	Q16720	P27824	P46939	P49757	P51991	P62081	P62258	Q01973	Q12955	Q13492	Q14160	Q15811	Q17RY0	Q6XZF7	Q8IZH2	Q8N5G2	Q8N6T3	Q8TDM6	Q96A49	Q96A65	Q96RT1	Q99767	Q99963	Q9C026	Q9C0D5	Q9HAU0
GO:CC	distal axon	GO:0150034	0.0442965	1.35363	292	251	13	18842	O00213	O14617	O14640	O60716	P46939	P62258	Q01973	Q15811	Q17RY0	Q8TEW0	Q96A49	Q96A65	Q9C0D5
GO:CC	nuclear inner membrane	GO:0005637	0.0447313	1.34939	61	251	6	18842	P43243	P50402	Q14739	Q5JTV8	Q5SNT2	Q9Y2U8
GO:CC	P-body	GO:0000932	0.0456597	1.34047	87	251	7	18842	A5YKK6	Q13501	Q8IZH2	Q8NDV7	Q9NRA8	Q9UGP4	Q9UPQ9
KEGG	Wnt signaling pathway	KEGG:04310	5.16613e-06	5.28683	160	112	14	7772	O14640	O14641	O15169	P25054	P48729	P49674	Q01973	Q01974	Q68DV7	Q8TAA9	Q92997	Q969F2	Q9HC62	Q9ULK5
KEGG	Hippo signaling pathway	KEGG:04390	2.42392e-05	4.61548	154	112	13	7772	O14640	O14641	O15169	P25054	P49674	P62258	Q13625	Q14160	Q4VCS5	Q8TEW0	Q92997	Q9NRM7	Q9UGP4
KEGG	RNA transport	KEGG:03013	0.00023716	3.62496	159	112	12	7772	A8CG34	O15504	O75694	P49790	P49792	P61956	P57740	Q8WUM0	Q96HA1	Q9BTX1	Q9H307	Q9HC62
KEGG	Protein processing in endoplasmic reticulum	KEGG:04141	0.0115702	1.93666	166	112	10	7772	O95486	O95487	P07237	P11021	P14625	P27824	P30101	Q15084	Q92890	Q9Y4L1
KEGG	Basal cell carcinoma	KEGG:05217	0.024142	1.61723	63	112	6	7772	O14640	O14641	O15169	P10071	P25054	Q92997
REAC	Nuclear Envelope Breakdown	REAC:R-HSA-2980766	7.19e-10	9.14349	47	154	12	10565	A8CG34	O15504	O75694	P06493	P49790	P49792	P50402	P57740	Q8WUM0	Q96HA1	Q9BTX1	Q9Y2U8
REAC	SUMOylation of SUMOylation proteins	REAC:R-HSA-4085377	5.65e-09	8.24797	32	154	10	10565	A8CG34	O15504	O75694	P49790	P49792	P61956	P57740	Q8WUM0	Q96HA1	Q9BTX1
REAC	Nuclear Pore Complex (NPC) Disassembly	REAC:R-HSA-3301854	8.01e-09	8.0966	33	154	10	10565	A8CG34	O15504	O75694	P06493	P49790	P49792	P57740	Q8WUM0	Q96HA1	Q9BTX1
REAC	Transport of Mature mRNA Derived from an Intronless Transcript	REAC:R-HSA-159231	3.84e-08	7.4155	38	154	10	10565	A8CG34	O15504	O75694	P49790	P49792	P57740	Q6UN15	Q8WUM0	Q96HA1	Q9BTX1
REAC	Transport of Mature mRNAs Derived from Intronless Transcripts	REAC:R-HSA-159234	5.1e-08	7.29225	39	154	10	10565	A8CG34	O15504	O75694	P49790	P49792	P57740	Q6UN15	Q8WUM0	Q96HA1	Q9BTX1
REAC	Transport of Ribonucleoproteins into the Host Nucleus	REAC:R-HSA-168271	6.55e-08	7.18362	29	154	9	10565	A8CG34	O15504	O75694	P49790	P49792	P57740	Q8WUM0	Q96HA1	Q9BTX1
REAC	NEP/NS2 Interacts with the Cellular Export Machinery	REAC:R-HSA-168333	6.55e-08	7.18362	29	154	9	10565	A8CG34	O15504	O75694	P49790	P49792	P57740	Q8WUM0	Q96HA1	Q9BTX1
REAC	Regulation of Glucokinase by Glucokinase Regulatory Protein	REAC:R-HSA-170822	6.55e-08	7.18362	29	154	9	10565	A8CG34	O15504	O75694	P49790	P49792	P57740	Q8WUM0	Q96HA1	Q9BTX1
REAC	Defective TPR may confer susceptibility towards thyroid papillary carcinoma (TPC)	REAC:R-HSA-5619107	6.55e-08	7.18362	29	154	9	10565	A8CG34	O15504	O75694	P49790	P49792	P57740	Q8WUM0	Q96HA1	Q9BTX1
REAC	Export of Viral Ribonucleoproteins from Nucleus	REAC:R-HSA-168274	9.24e-08	7.03411	30	154	9	10565	A8CG34	O15504	O75694	P49790	P49792	P57740	Q8WUM0	Q96HA1	Q9BTX1
REAC	Nuclear import of Rev protein	REAC:R-HSA-180746	1.29e-07	6.89057	31	154	9	10565	A8CG34	O15504	O75694	P49790	P49792	P57740	Q8WUM0	Q96HA1	Q9BTX1
REAC	Transport of the SLBP independent Mature mRNA	REAC:R-HSA-159227	1.29e-07	6.89057	31	154	9	10565	A8CG34	O15504	O75694	P49790	P49792	P57740	Q8WUM0	Q96HA1	Q9BTX1
REAC	Vpr-mediated nuclear import of PICs	REAC:R-HSA-180910	1.29e-07	6.89057	31	154	9	10565	A8CG34	O15504	O75694	P49790	P49792	P57740	Q8WUM0	Q96HA1	Q9BTX1
REAC	SUMOylation of RNA binding proteins	REAC:R-HSA-4570464	1.46e-07	6.8345	43	154	10	10565	A8CG34	O15504	O75694	P49790	P49792	P61956	P57740	Q8WUM0	Q96HA1	Q9BTX1
REAC	SUMOylation of DNA replication proteins	REAC:R-HSA-4615885	1.46e-07	6.8345	43	154	10	10565	A8CG34	O15504	O75694	P49790	P49792	P61956	P57740	Q8WUM0	Q96HA1	Q9BTX1
REAC	Transport of the SLBP Dependant Mature mRNA	REAC:R-HSA-159230	1.77e-07	6.75255	32	154	9	10565	A8CG34	O15504	O75694	P49790	P49792	P57740	Q8WUM0	Q96HA1	Q9BTX1
REAC	Rev-mediated nuclear export of HIV RNA	REAC:R-HSA-165054	1.77e-07	6.75255	32	154	9	10565	A8CG34	O15504	O75694	P49790	P49792	P57740	Q8WUM0	Q96HA1	Q9BTX1
REAC	Interactions of Rev with host cellular proteins	REAC:R-HSA-177243	3.22e-07	6.4915	34	154	9	10565	A8CG34	O15504	O75694	P49790	P49792	P57740	Q8WUM0	Q96HA1	Q9BTX1
REAC	Interactions of Vpr with host cellular proteins	REAC:R-HSA-176033	3.22e-07	6.4915	34	154	9	10565	A8CG34	O15504	O75694	P49790	P49792	P57740	Q8WUM0	Q96HA1	Q9BTX1
REAC	SUMOylation of ubiquitinylation proteins	REAC:R-HSA-3232142	4.29e-07	6.3678	35	154	9	10565	A8CG34	O15504	O75694	P49790	P49792	P57740	Q8WUM0	Q96HA1	Q9BTX1
REAC	Metabolism of non-coding RNA	REAC:R-HSA-194441	8.83e-07	6.05407	51	154	10	10565	A8CG34	O15504	O75694	P49790	P49792	P57740	P62304	Q8WUM0	Q96HA1	Q9BTX1
REAC	snRNP Assembly	REAC:R-HSA-191859	8.83e-07	6.05407	51	154	10	10565	A8CG34	O15504	O75694	P49790	P49792	P57740	P62304	Q8WUM0	Q96HA1	Q9BTX1
REAC	NS1 Mediated Effects on Host Pathways	REAC:R-HSA-168276	9.54e-07	6.02062	38	154	9	10565	A8CG34	O15504	O75694	P49790	P49792	P57740	Q8WUM0	Q96HA1	Q9BTX1
REAC	Regulation of HSF1-mediated heat shock response	REAC:R-HSA-3371453	1.00348e-06	5.99849	67	154	11	10565	A8CG34	O15504	O75694	P11021	P49790	P49792	P57740	P62258	Q8WUM0	Q96HA1	Q9BTX1
REAC	Host Interactions with Influenza Factors	REAC:R-HSA-168253	1.22441e-06	5.91207	39	154	9	10565	A8CG34	O15504	O75694	P49790	P49792	P57740	Q8WUM0	Q96HA1	Q9BTX1
REAC	Viral Messenger RNA Synthesis	REAC:R-HSA-168325	1.97456e-06	5.70453	41	154	9	10565	A8CG34	O15504	O75694	P49790	P49792	P57740	Q8WUM0	Q96HA1	Q9BTX1
REAC	Membrane Trafficking	REAC:R-HSA-199991	1.98403e-06	5.70245	626	154	30	10565	O00161	O14641	O14964	O15027	O75976	O95486	O95487	P62258	Q07157	Q08379	Q12955	Q13492	Q14789	Q14C86	Q15643	Q15811	Q5JRA6	Q8N6T3	Q8TBA6	Q92738	Q92783	Q96A65	Q99963	Q9BV40	Q9H3P7	Q9NP61	Q9NZ52	Q9UM54	Q9UPM8	Q9Y6Y8
REAC	Mitotic Prophase	REAC:R-HSA-68875	3.22455e-06	5.49153	135	154	14	10565	A8CG34	O15504	O75694	P06493	P49790	P49792	P50402	P57740	Q08379	Q8WUM0	Q96HA1	Q9BTX1	Q9H8Y8	Q9Y2U8
REAC	Vesicle-mediated transport	REAC:R-HSA-5653656	3.50633e-06	5.45515	720	154	32	10565	O00161	O14641	O14964	O15027	O75976	O95486	O95487	P14625	P62258	Q07157	Q08379	Q12955	Q13492	Q14789	Q14C86	Q15643	Q15811	Q5JRA6	Q8N6T3	Q8TBA6	Q92738	Q92783	Q96A65	Q99963	Q9BV40	Q9H3P7	Q9NP61	Q9NZ52	Q9UM54	Q9UPM8	Q9Y4L1	Q9Y6Y8
REAC	Processing of Capped Intron-Containing Pre-mRNA	REAC:R-HSA-72203	3.63627e-06	5.43934	238	154	18	10565	A8CG34	O15504	O43809	O75694	P09234	P09651	P17844	P22626	P49790	P49792	P51991	P52272	P57740	P62304	Q6UN15	Q8WUM0	Q96HA1	Q9BTX1
REAC	SUMOylation of chromatin organization proteins	REAC:R-HSA-4551638	1.20924e-05	4.91749	66	154	10	10565	A8CG34	O15504	O75694	P49790	P49792	P61956	P57740	Q8WUM0	Q96HA1	Q9BTX1
REAC	M Phase	REAC:R-HSA-68886	1.31969e-05	4.87953	385	154	22	10565	A8CG34	O15504	O75694	P06493	P49674	P49790	P49792	P50402	P57740	P62258	Q08379	Q14008	Q7Z4H7	Q86XL3	Q8NHV4	Q8TCU4	Q8WUM0	Q8WYP5	Q96HA1	Q9BTX1	Q9H8Y8	Q9Y2U8
REAC	Cellular response to heat stress	REAC:R-HSA-3371556	1.70339e-05	4.76869	87	154	11	10565	A8CG34	O15504	O75694	P11021	P49790	P49792	P57740	P62258	Q8WUM0	Q96HA1	Q9BTX1
REAC	SUMOylation of DNA damage response and repair proteins	REAC:R-HSA-3108214	2.85189e-05	4.54487	72	154	10	10565	A8CG34	O15504	O75694	P49790	P49792	P61956	P57740	Q8WUM0	Q96HA1	Q9BTX1
REAC	tRNA processing in the nucleus	REAC:R-HSA-6784531	3.01178e-05	4.52118	55	154	9	10565	A8CG34	O15504	O75694	P49790	P49792	P57740	Q8WUM0	Q96HA1	Q9BTX1
REAC	Transport of Mature Transcript to Cytoplasm	REAC:R-HSA-72202	7.92624e-05	4.10093	80	154	10	10565	A8CG34	O15504	O75694	P49790	P49792	P57740	Q6UN15	Q8WUM0	Q96HA1	Q9BTX1
REAC	Glycolysis	REAC:R-HSA-70171	0.00017451	3.75818	67	154	9	10565	A8CG34	O15504	O75694	P49790	P49792	P57740	Q8WUM0	Q96HA1	Q9BTX1
REAC	ISG15 antiviral mechanism	REAC:R-HSA-1169408	0.000289244	3.53874	71	154	9	10565	A8CG34	O15504	O75694	P49790	P49792	P57740	Q8WUM0	Q96HA1	Q9BTX1
REAC	Transport of Mature mRNA derived from an Intron-Containing Transcript	REAC:R-HSA-159236	0.000289244	3.53874	71	154	9	10565	A8CG34	O15504	O75694	P49790	P49792	P57740	Q8WUM0	Q96HA1	Q9BTX1
REAC	Antiviral mechanism by IFN-stimulated genes	REAC:R-HSA-1169410	0.000723856	3.14035	79	154	9	10565	A8CG34	O15504	O75694	P49790	P49792	P57740	Q8WUM0	Q96HA1	Q9BTX1
REAC	tRNA processing	REAC:R-HSA-72306	0.000852855	3.06912	103	154	10	10565	A8CG34	O15504	O75694	P49790	P49792	P57740	Q5VV42	Q8WUM0	Q96HA1	Q9BTX1
REAC	Transcriptional regulation by small RNAs	REAC:R-HSA-5578749	0.000931913	3.03062	104	154	10	10565	A8CG34	O15504	O75694	P49790	P49792	P57740	Q8NDV7	Q8WUM0	Q96HA1	Q9BTX1
REAC	WNT mediated activation of DVL	REAC:R-HSA-201688	0.00103729	2.9841	8	154	4	10565	O14640	O14641	P49674	Q92997
REAC	Glucose metabolism	REAC:R-HSA-70326	0.00134432	2.8715	85	154	9	10565	A8CG34	O15504	O75694	P49790	P49792	P57740	Q8WUM0	Q96HA1	Q9BTX1
REAC	Gene Silencing by RNA	REAC:R-HSA-211000	0.00139032	2.85689	134	154	11	10565	A8CG34	O15504	O75694	P49790	P49792	P57740	Q8NDV7	Q8WUM0	Q96HA1	Q9BTX1	Q9UPQ9
REAC	Disassembly of the destruction complex and recruitment of AXIN to the membrane	REAC:R-HSA-4641262	0.00169294	2.77136	31	154	6	10565	O14640	O14641	O15169	P25054	P48729	Q92997
REAC	Influenza Life Cycle	REAC:R-HSA-168255	0.00243985	2.61264	142	154	11	10565	A8CG34	O15504	O75694	P27824	P49790	P49792	P57740	P62081	Q8WUM0	Q96HA1	Q9BTX1
REAC	Cell Cycle									Mitotic;REAC:R-HSA-69278;0.0026889134652538296;2.5704231740383103;527;154;22;10565;A8CG34	O15504	O75694	P06493	P49674	P49790	P49792	P50402	P57740	P62258	Q08379	Q14008	Q7Z4H7	Q86XL3	Q8NHV4	Q8TCU4	Q8WUM0	Q8WYP5	Q96HA1	Q9BTX1	Q9H8Y8	Q9Y2U8
REAC	trans-Golgi Network Vesicle Budding	REAC:R-HSA-199992	0.00329638	2.48196	72	154	8	10565	O00161	O14964	O75976	Q13492	Q14789	Q9BV40	Q9H3P7	Q9UPM8
REAC	SUMOylation	REAC:R-HSA-2990846	0.00344476	2.46284	176	154	12	10565	A8CG34	O15504	O75694	P17844	P49790	P49792	P61956	P57740	Q8WUM0	Q96HA1	Q9BTX1	Q9HC62
REAC	SLC transporter disorders	REAC:R-HSA-5619102	0.00402174	2.39559	97	154	9	10565	A8CG34	O15504	O75694	P49790	P49792	P57740	Q8WUM0	Q96HA1	Q9BTX1
REAC	Negative regulation of TCF-dependent signaling by DVL-interacting proteins	REAC:R-HSA-5368598	0.00429329	2.36721	4	154	3	10565	O14640	O14641	Q92997
REAC	Influenza Infection	REAC:R-HSA-168254	0.00467646	2.33008	152	154	11	10565	A8CG34	O15504	O75694	P27824	P49790	P49792	P57740	P62081	Q8WUM0	Q96HA1	Q9BTX1
REAC	Influenza Viral RNA Transcription and Replication	REAC:R-HSA-168273	0.00839935	2.07575	133	154	10	10565	A8CG34	O15504	O75694	P49790	P49792	P57740	P62081	Q8WUM0	Q96HA1	Q9BTX1
REAC	Antigen Presentation: Folding									assembly and peptide loading of class I MHC;REAC:R-HSA-983170;0.009244714508281942;2.034106496012891;25;154;5;10565;O95486	O95487	P11021	P27824	P30101
REAC	Late Phase of HIV Life Cycle	REAC:R-HSA-162599	0.0101936	1.99167	136	154	10	10565	A8CG34	O15504	O75694	P49790	P49792	P52655	P57740	Q8WUM0	Q96HA1	Q9BTX1
REAC	Metabolism of RNA	REAC:R-HSA-8953854	0.0108042	1.96641	663	154	24	10565	A5YKK6	A8CG34	O15504	O43809	O75694	P09234	P09651	P17844	P22626	P49674	P49790	P49792	P51991	P52272	P57740	P62081	P62304	Q5VV42	Q6UN15	Q8IZH2	Q8WUM0	Q92540	Q96HA1	Q9BTX1
REAC	SUMO E3 ligases SUMOylate target proteins	REAC:R-HSA-3108232	0.0133198	1.8755	170	154	11	10565	A8CG34	O15504	O75694	P17844	P49790	P49792	P61956	P57740	Q8WUM0	Q96HA1	Q9BTX1
REAC	Cell Cycle	REAC:R-HSA-1640170	0.0148595	1.828	632	154	23	10565	A8CG34	O15504	O75694	P06493	P49674	P49790	P49792	P50402	P57740	P62258	Q08379	Q14008	Q6P0N0	Q7Z4H7	Q86XL3	Q8NHV4	Q8TCU4	Q8WUM0	Q8WYP5	Q96HA1	Q9BTX1	Q9H8Y8	Q9Y2U8
REAC	Loss of Nlp from mitotic centrosomes	REAC:R-HSA-380259	0.020053	1.69782	68	154	7	10565	P06493	P49674	P62258	Q14008	Q7Z4H7	Q8NHV4	Q8TCU4
REAC	Loss of proteins required for interphase microtubule organization from the centrosome	REAC:R-HSA-380284	0.020053	1.69782	68	154	7	10565	P06493	P49674	P62258	Q14008	Q7Z4H7	Q8NHV4	Q8TCU4
REAC	HIV Life Cycle	REAC:R-HSA-162587	0.0222732	1.65222	149	154	10	10565	A8CG34	O15504	O75694	P49790	P49792	P52655	P57740	Q8WUM0	Q96HA1	Q9BTX1
REAC	AURKA Activation by TPX2	REAC:R-HSA-8854518	0.0265235	1.57637	71	154	7	10565	P06493	P49674	P62258	Q14008	Q7Z4H7	Q8NHV4	Q8TCU4
REAC	Host Interactions of HIV factors	REAC:R-HSA-162909	0.0304331	1.51665	125	154	9	10565	A8CG34	O15504	O75694	P49790	P49792	P57740	Q8WUM0	Q96HA1	Q9BTX1
REAC	ER to Golgi Anterograde Transport	REAC:R-HSA-199977	0.0310584	1.50782	155	154	10	10565	O15027	O95486	O95487	Q08379	Q12955	Q14789	Q5JRA6	Q8N6T3	Q9NP61	Q9Y6Y8
REAC	Infectious disease	REAC:R-HSA-5663205	0.0343763	1.46374	370	154	16	10565	A8CG34	O14964	O15504	O60716	O75694	P27824	P49790	P49792	P52655	P57740	P62081	Q8WUM0	Q92783	Q96HA1	Q99963	Q9BTX1
REAC	Golgi Associated Vesicle Biogenesis	REAC:R-HSA-432722	0.045055	1.34626	54	154	6	10565	O75976	Q13492	Q14789	Q9BV40	Q9H3P7	Q9UPM8
REAC	Mitotic Prometaphase	REAC:R-HSA-68877	0.0460674	1.33661	195	154	11	10565	P06493	P49674	P49792	P57740	P62258	Q14008	Q7Z4H7	Q8NHV4	Q8TCU4	Q8WUM0	Q8WYP5
WP	ncRNAs involved in Wnt signaling in hepatocellular carcinoma	WP:WP4336	1.77367e-06	5.75113	87	108	12	6507	O14640	O14641	O15169	P25054	P48729	P49674	Q01973	Q01974	Q86UE4	Q92997	Q969F2	Q9HC62
WP	Wnt Signaling	WP:WP428	5.00096e-06	5.30095	115	108	13	6507	O14640	O14641	O15169	P25054	P48729	P49674	Q01973	Q01974	Q8TAA9	Q92997	Q969F2	Q9HC62	Q9ULK5
WP	Wnt Signaling Pathway	WP:WP363	1.66279e-05	4.77916	52	108	9	6507	O14640	O14641	O15169	P25054	P48729	P49674	Q01973	Q01974	Q92997
WP	LncRNA involvement in canonical Wnt signaling and colorectal cancer	WP:WP4258	6.3394e-05	4.19795	98	108	11	6507	O14640	O14641	O15169	P25054	P48729	P49674	Q01973	Q01974	Q92997	Q969F2	Q9HC62
WP	Regulation of Wnt/B-catenin Signaling by Small Molecule Compounds	WP:WP3664	0.0173411	1.76092	17	108	4	6507	O14641	O15169	P25054	P48729
WP	Ciliary landscape	WP:WP4352	0.0253861	1.5954	215	108	12	6507	A5YKK6	P08670	P17844	P25054	P27105	Q8NDI1	Q8WUM0	Q92997	Q96A65	Q96HA1	Q96PK6	Q9NP61
WP	Wnt Signaling Pathway and Pluripotency	WP:WP399	0.0320557	1.49409	102	108	8	6507	O14640	O14641	O15169	O60716	P25054	P49674	Q92997	Q969F2
TF	Factor: ETF
TF	Factor: ETF
TF	Factor: ETF
TF	Factor: RNF96
TF	Factor: E2F-1:Elk-1
TF	Factor: E2F-1:Elk-1
TF	Factor: E2F-1
TF	Factor: WT1
TF	Factor: WT1
TF	Factor: Egr-1
TF	Factor: E2F
TF	Factor: E2F-4
TF	Factor: E2F-4
TF	Factor: ZF5
TF	Factor: E2F-4
TF	Factor: E2F-1:Elk-1
TF	Factor: E2F
TF	Factor: E2F
TF	Factor: E2F-4
TF	Factor: E2F-4
TF	Factor: E2F-3:HES-7
TF	Factor: KROX
TF	Factor: KROX
TF	Factor: MAZ
TF	Factor: RNF96
TF	Factor: RNF96
TF	Factor: E2F-4
TF	Factor: E2F-4
TF	Factor: WT1
TF	Factor: WT1
TF	Factor: Egr-1
TF	Factor: Egr-1
TF	Factor: ZF5
TF	Factor: ZF5
TF	Factor: WT1
TF	Factor: WT1
TF	Factor: MOVO-B
TF	Factor: MOVO-B
TF	Factor: WT1
TF	Factor: E2F-1
TF	Factor: E2F-1
TF	Factor: E2F-1:HES-7
TF	Factor: EGR1
TF	Factor: EGR1
TF	Factor: E2F-4
TF	Factor: E2F-4
TF	Factor: E2F-1
TF	Factor: E2F-1
TF	Factor: E2F-1
TF	Factor: Churchill
TF	Factor: Churchill
TF	Factor: MAZ
TF	Factor: MAZ
TF	Factor: AP-2
TF	Factor: AP-2
TF	Factor: EGR
TF	Factor: EGR
TF	Factor: E2F-4
TF	Factor: Egr-1
TF	Factor: Egr-1
TF	Factor: MAZ
TF	Factor: MAZ
TF	Factor: WT1
TF	Factor: WT1
TF	Factor: CKROX
TF	Factor: CKROX
TF	Factor: MOVO-B
TF	Factor: RUNX3
TF	Factor: RUNX3
TF	Factor: Egr-1
TF	Factor: Egr-1
TF	Factor: E2F-3
TF	Factor: E2F-3
TF	Factor: E2F-3
TF	Factor: ZF5
TF	Factor: ZF5
TF	Factor: ZF5
TF	Factor: ETF
TF	Factor: AhR									;;;;;;;;
TF	Factor: AhR									;;;;;;;;
TF	Factor: E2F-1
TF	Factor: E2F-1
TF	Factor: SP1:SP3
TF	Factor: SP1:SP3
TF	Factor: Churchill
TF	Factor: AP-2gamma:Elk-1
TF	Factor: CTCF
TF	Factor: CTCF
TF	Factor: BEN
TF	Factor: CHD2
TF	Factor: CHD2
TF	Factor: Sp1
TF	Factor: Sp1
TF	Factor: Sp1
TF	Factor: YY1
TF	Factor: YY1
TF	Factor: AP-2
TF	Factor: AP-2
TF	Factor: Sp1
TF	Factor: Sp1
TF	Factor: E2F-1
TF	Factor: E2F-1
TF	Factor: E2F-1
TF	Factor: E2F1
TF	Factor: E2F1
TF	Factor: Kaiso
TF	Factor: Osx
TF	Factor: Osx
TF	Factor: EGR1
TF	Factor: EGR1
TF	Factor: CHD2
TF	Factor: AP-2
TF	Factor: Egr-1
TF	Factor: Egr-1
TF	Factor: E2F-1
TF	Factor: E2F-1
TF	Factor: RUNX2
TF	Factor: RUNX2
TF	Factor: AP2
TF	Factor: AP2
TF	Factor: p300
TF	Factor: SP2
TF	Factor: SP2
TF	Factor: WT1
MIRNA	hsa-miR-615-3p	MIRNA:hsa-miR-615-3p	0.000670332	3.17371	891	259	37	14751	A5YKK6	O14617	O14639	O14776	O15027	O60716	O75420	O95425	P07237	P08670	P09651	P22626	P27824	P46013	P49069	P50402	P50851	P52272	P98175	Q07157	Q07666	Q08379	Q13162	Q14596	Q5JSZ5	Q7Z2W4	Q7Z3T8	Q8TAA9	Q92997	Q96DN5	Q96J84	Q96PV6	Q99767	Q9NZ52	Q9UPN3	Q9Y4L1	Q9Y5V3
MIRNA	hsa-miR-92a-3p	MIRNA:hsa-miR-92a-3p	0.00069454	3.1583	1405	259	50	14751	A5YKK6	O14497	O14617	O15037	O15169	O75182	O75410	O75694	O95486	P06493	P07237	P14625	P17844	P22626	P46013	P49792	P50402	P51617	P52272	P52655	P62304	P98175	Q07666	Q12923	Q14596	Q17RY0	Q5JRA6	Q5JSZ5	Q7Z2W4	Q7Z3T8	Q7Z417	Q86XL3	Q8IZH2	Q8NDI1	Q8TCU4	Q92575	Q92625	Q96JH7	Q9BY89	Q9C0B5	Q9H792
MIRNA	hsa-miR-877-3p	MIRNA:hsa-miR-877-3p	0.0019995	2.69908	603	259	28	14751	O14497	O14776	O14964	O15037	O75420	P09234	Q16720	P22626	P27824	P46013	P55209	P62258	Q07666	Q13625	Q14160	Q14966	Q5JSZ5	Q6UN15	Q8NEV8	Q96A49	Q96A65	Q96HA1	Q96JH7	Q96RT1	Q9C0C9	Q9H307	Q9P246	Q9UPN3
MIRNA	hsa-miR-484	MIRNA:hsa-miR-484	0.00448876	2.34787	889	259	35	14751	O14497	O14617	O14641	O15027	O15169	O75420	P07237	P09651	P14625	P46013	P46939	P49069	P50402	P50454	P51991	P52272	P62258	Q13162	Q13283	Q13501	Q14008	Q14739	Q15654	Q3YEC7	Q5JSZ5	Q7Z417	Q8NDV7	Q8TDM6	Q92545	Q92616	Q96HA1	Q96KG9	Q9P2F8	Q9UPQ9	Q9Y4L1
MIRNA	hsa-miR-93-3p	MIRNA:hsa-miR-93-3p	0.0159216	1.79801	268	259	16	14751	A5YKK6	P11021	P27824	P50851	P51617	Q14160	Q8N6T3	Q8TAA9	Q8TEW0	Q96A65	Q96KQ4	Q9BY89	Q9H3U1	Q9NP61	Q9NRA8	Q9Y4L1
MIRNA	hsa-miR-23b-3p	MIRNA:hsa-miR-23b-3p	0.0373889	1.42726	319	259	17	14751	A8CG34	P09234	Q13283	Q14739	Q15084	Q15652	Q15678	Q5JTV8	Q6XZF7	Q7Z417	Q8N5C8	Q8NDV7	Q96RT1	Q9H307	Q9H3U1	Q9NYJ8	Q9UPQ9
MIRNA	hsa-miR-186-5p	MIRNA:hsa-miR-186-5p	0.0387776	1.41142	747	259	29	14751	O15504	O75182	O95486	O95487	P09651	P25054	P29317	P42694	P48729	P49792	P61956	P62081	P62258	P98175	Q12923	Q13283	Q14008	Q14160	Q14739	Q7Z417	Q7Z4H7	Q7Z7G8	Q8WU20	Q8WYP5	Q9P206	Q9P2F5	Q9UGI8	Q9UHD8	Q9UPS8
MIRNA	hsa-miR-222-3p	MIRNA:hsa-miR-222-3p	0.0457331	1.33977	390	259	19	14751	O14497	O14639	O14776	P27824	P50454	P51617	P98175	Q13162	Q13625	Q3YEC7	Q7Z3T8	Q8TAA9	Q8WXE0	Q92616	Q96HA1	Q9BTX1	Q9P2F5	Q9UPN3	Q9UPQ9
[truncated: 199 more columns]
