# Supplementary material for: RNF43 inhibits WNT5A-driven signaling and suppresses melanoma invasion and resistance to the targeted therapy
Source: eLife. 2021 Oct 27;10:e65759. doi: 10.7554/eLife.65759 (PMC8550759; doi:10.7554/eLife.65759)
Supplement: Figure 2—figure supplement 1—source data 1. [file elife-65759-fig2-figsupp1-data1.xlsx]

## Sheet: Sheet1
C'		DNA	ROR1	RNF43
	0	0.033216	0.036077	0.237548
	6.02e-08	0.021687	0.041035	0.250482
	1.2e-07	0.025987	0.037445	0.241739
	1.81e-07	0.015146	0.043223	0.29535
	2.41e-07	0.030534	0.048804	0.228967
	3.01e-07	0.029806	0.049722	0.298951
	3.61e-07	0.072451	0.047845	0.417319
	4.22e-07	0.043343	0.055016	0.474793
	4.82e-07	0.050687	0.053966	0.523484
	5.42e-07	0.030146	0.094199	0.396404
	6.02e-07	0.020296	0.215942	0.3481
	6.62e-07	0.040204	0.404775	0.309159
	7.23e-07	0.040931	0.609642	0.438339
	7.83e-07	0.043859	0.670456	0.566261
	8.43e-07	0.021752	0.608902	0.555939
	9.03e-07	0.039018	0.445614	0.553392
	9.63e-07	0.01903	0.259648	0.778164
	1.02e-06	0.069127	0.149057	0.772762
	1.08e-06	0.06047	0.108014	0.7265
	1.14e-06	0.029498	0.091277	0.561374
	1.2e-06	0.022821	0.088215	0.528814
	1.26e-06	0.020414	0.09527	0.475276
	1.32e-06	0.022761	0.096033	0.398338
	1.39e-06	0.030851	0.098903	0.325553
	1.45e-06	0.047206	0.092057	0.332424
	1.51e-06	0.039829	0.081997	0.319947
	1.57e-06	0.040049	0.070163	0.267521
	1.63e-06	0.049802	0.059522	0.245573
	1.69e-06	0.040425	0.05759	0.19634
	1.75e-06	0.043112	0.073729	0.127729
	1.81e-06	0.043154	0.120991	0.135143
	1.87e-06	0.027664	0.172241	0.099893
	1.93e-06	0.032163	0.246508	0.13467
	1.99e-06	0.029817	0.319808	0.144534
	2.05e-06	0.031656	0.401981	0.108898
	2.11e-06	0.039429	0.483488	0.102187
	2.17e-06	0.058041	0.478513	0.110243
	2.23e-06	0.025658	0.493055	0.082637
	2.29e-06	0.01857	0.570594	0.096092
	2.35e-06	0.030685	0.605893	0.142734
	2.41e-06	0.043372	0.691212	0.17079
	2.47e-06	0.034723	0.754523	0.15467
	2.53e-06	0.056842	0.815541	0.364968
	2.59e-06	0.039071	0.899068	0.391429
	2.65e-06	0.061636	0.996174	0.475381
	2.71e-06	0.044585	0.940828	0.517415
	2.77e-06	0.037353	0.888724	0.462285
	2.83e-06	0.038437	0.765651	0.439106
	2.89e-06	0.047594	0.651708	0.379763
	2.95e-06	0.057906	0.545454	0.238498
	3.01e-06	0.039986	0.475449	0.323617
	3.07e-06	0.026982	0.434584	0.358853
	3.13e-06	0.044661	0.36931	0.420191
	3.19e-06	0.050279	0.316788	0.506954
	3.25e-06	0.029711	0.297799	0.571703
	3.31e-06	0.048789	0.335566	0.612117
	3.37e-06	0.037823	0.401705	0.553607
	3.43e-06	0.040295	0.500632	0.495234
	3.49e-06	0.070888	0.566187	0.577445
	3.55e-06	0.036483	0.629802	0.597833
	3.61e-06	0.041988	0.638265	0.748497
	3.67e-06	0.034831	0.615555	0.875386
	3.73e-06	0.084886	0.591122	0.940924
	3.79e-06	0.112535	0.548499	0.828165
	3.85e-06	0.070252	0.498432	0.739601
	3.91e-06	0.058431	0.467705	0.563926
	3.97e-06	0.089672	0.433254	0.768789
	4.03e-06	0.065968	0.432938	0.782855
	4.09e-06	0.037338	0.433953	0.676552
	4.16e-06	0.061934	0.438094	0.561873
	4.22e-06	0.085458	0.466369	0.659916
	4.28e-06	0.088918	0.473928	0.65206
	4.34e-06	0.044061	0.513213	0.75047
	4.4e-06	0.040717	0.550937	0.655792
	4.46e-06	0.058894	0.571281	0.742284
	4.52e-06	0.063299	0.571507	0.689316
	4.58e-06	0.06239	0.534554	0.604615
	4.64e-06	0.040078	0.496468	0.570244
	4.7e-06	0.068666	0.50125	0.579717
	4.76e-06	0.056022	0.507836	0.533308
	4.82e-06	0.03813	0.499876	0.448324
	4.88e-06	0.051805	0.517708	0.522415
	4.94e-06	0.049144	0.492887	0.572345
	5e-06	0.078561	0.45112	0.426584
	5.06e-06	0.089002	0.441572	0.333721
	5.12e-06	0.075604	0.43498	0.476722
	5.18e-06	0.097775	0.422099	0.530329
	5.24e-06	0.06581	0.426324	0.497575
	5.3e-06	0.068479	0.453132	0.537662
	5.36e-06	0.055556	0.418024	0.711682
	5.42e-06	0.060139	0.393351	0.804145
	5.48e-06	0.103638	0.388574	0.713069
	5.54e-06	0.070763	0.40129	0.727721
	5.6e-06	0.062682	0.413415	0.666562
	5.66e-06	0.07583	0.404423	0.671366
	5.72e-06	0.162468	0.385789	0.717206
	5.78e-06	0.064994	0.314469	0.626172
	5.84e-06	0.087257	0.294363	0.776078
	5.9e-06	0.118197	0.282995	0.771571
	5.96e-06	0.069655	0.278024	0.590134
	6.02e-06	0.070073	0.236856	0.64089
	6.08e-06	0.086711	0.204084	0.612348
	6.14e-06	0.113474	0.164689	0.530676
	6.2e-06	0.098936	0.151352	0.51237
	6.26e-06	0.098855	0.15321	0.582027
	6.32e-06	0.117197	0.166787	0.555907
	6.38e-06	0.097942	0.182655	0.540792
	6.44e-06	0.099897	0.218601	0.457415
	6.5e-06	0.098393	0.23696	0.555363
	6.56e-06	0.123562	0.275993	0.624424
	6.62e-06	0.148584	0.348299	0.591817
	6.68e-06	0.201333	0.408096	0.622596
	6.74e-06	0.321705	0.412885	0.606722
	6.8e-06	0.393473	0.399884	0.406323
	6.86e-06	0.434166	0.369375	0.496507
	6.93e-06	0.510788	0.309778	0.530104
	6.99e-06	0.466838	0.276562	0.615818
	7.05e-06	0.543523	0.261727	0.812565
	7.11e-06	0.532407	0.244404	0.676155
	7.17e-06	0.648315	0.245995	0.732553
	7.23e-06	0.740192	0.243169	0.580475
	7.29e-06	0.609933	0.234948	0.54387
	7.35e-06	0.558311	0.221881	0.614945
	7.41e-06	0.70851	0.206875	0.544333
	7.47e-06	0.663071	0.20921	0.644176
	7.53e-06	0.588481	0.205053	0.46971
	7.59e-06	0.59869	0.206666	0.531841
	7.65e-06	0.646806	0.213548	0.672533
	7.71e-06	0.66066	0.189593	0.605132
	7.77e-06	0.628063	0.187554	0.512931
	7.83e-06	0.590547	0.180958	0.552192
	7.89e-06	0.612328	0.156364	0.367987
	7.95e-06	0.625396	0.14772	0.298041
	8.01e-06	0.623691	0.150622	0.389645
	8.07e-06	0.584237	0.147598	0.421381
	8.13e-06	0.5379	0.1384	0.435262
	8.19e-06	0.640082	0.149888	0.331459
	8.25e-06	0.623956	0.154911	0.273572
	8.31e-06	0.591911	0.146329	0.340315
	8.37e-06	0.620615	0.147007	0.334608
	8.43e-06	0.679253	0.143017	0.237266
	8.49e-06	0.670761	0.12628	0.203106
	8.55e-06	0.620087	0.112159	0.172832
	8.61e-06	0.670287	0.109907	0.176715
	8.67e-06	0.731316	0.118744	0.240851
	8.73e-06	0.775736	0.132234	0.225936
	8.79e-06	0.860734	0.15508	0.212911
	8.85e-06	0.747454	0.137055	0.237069
	8.91e-06	0.715383	0.134071	0.193618
	8.97e-06	0.739873	0.116792	0.156719
	9.03e-06	0.706602	0.123039	0.255719
	9.09e-06	0.634184	0.095591	0.165093
	9.15e-06	0.829136	0.094824	0.239507
	9.21e-06	0.856819	0.097847	0.246165
	9.27e-06	0.687007	0.091662	0.270276
	9.33e-06	0.776073	0.075408	0.138575
	9.39e-06	0.747622	0.081738	0.145001
	9.45e-06	0.797303	0.090473	0.098343
	9.51e-06	0.790497	0.093979	0.134782
	9.57e-06	0.883577	0.084201	0.135921
	9.63e-06	0.865208	0.082836	0.14071
	9.7e-06	0.887141	0.08539	0.179634
	9.76e-06	0.83617	0.085575	0.155722
	9.82e-06	0.802827	0.09174	0.145633
	9.88e-06	0.73593	0.08908	0.105802
	9.94e-06	0.744368	0.085065	0.112027
	1e-05	0.808837	0.085552	0.130775
	1.01e-05	0.789994	0.09095	0.138182
	1.01e-05	0.768324	0.090707	0.097533
	1.02e-05	0.715904	0.074437	0.07037
	1.02e-05	0.600363	0.071862	0.099383
	1.03e-05	0.537232	0.070222	0.10968
	1.04e-05	0.583693	0.061723	0.102421
	1.04e-05	0.610419	0.0523	0.116926
	1.05e-05	0.625959	0.045629	0.163144
	1.05e-05	0.718658	0.042088	0.253572
	1.06e-05	0.706051	0.042632	0.278179
	1.07e-05	0.635634	0.045207	0.198254
	1.07e-05	0.672432	0.048284	0.207266
	1.08e-05	0.633129	0.046018	0.290823
	1.08e-05	0.695419	0.040106	0.20156
	1.09e-05	0.681647	0.046975	0.079097
	1.1e-05	0.686748	0.047952	0.084432
	1.1e-05	0.859229	0.035503	0.155202
	1.11e-05	0.868692	0.052345	0.104758
	1.11e-05	0.903825	0.0522	0.089915
	1.12e-05	0.813365	0.048584	0.064552
	1.13e-05	0.872511	0.046054	0.146794
	1.13e-05	0.882628	0.04762	0.118862
	1.14e-05	0.948541	0.050585	0.111675
	1.14e-05	0.95337	0.048746	0.087514
	1.15e-05	0.838552	0.046476	0.141024
	1.16e-05	0.89292	0.047546	0.134454
	1.16e-05	0.888906	0.047134	0.148702
	1.17e-05	0.823261	0.046477	0.167764
	1.17e-05	0.889969	0.051066	0.138556
	1.18e-05	0.878043	0.054058	0.13045
	1.19e-05	0.851998	0.070673	0.14135
	1.19e-05	0.857183	0.089599	0.166803
	1.2e-05	0.873531	0.095991	0.165253
	1.2e-05	0.908399	0.105194	0.21137
	1.21e-05	0.866979	0.104848	0.263743
	1.22e-05	0.932672	0.088172	0.157611
	1.22e-05	0.957247	0.06847	0.135121
	1.23e-05	0.875459	0.071396	0.196169
	1.23e-05	1	0.08338	0.329072
	1.24e-05	0.844061	0.092331	0.18156
	1.25e-05	0.896963	0.095498	0.21069
	1.25e-05	0.920177	0.089963	0.077111
	1.26e-05	0.789189	0.082013	0.153787
	1.26e-05	0.843705	0.075485	0.202636
	1.27e-05	0.867018	0.074164	0.106107
	1.28e-05	0.813856	0.054198	0.105822
	1.28e-05	0.822991	0.061851	0.123584
	1.29e-05	0.776545	0.068588	0.131469
	1.29e-05	0.671407	0.074138	0.07346
	1.3e-05	0.721817	0.088283	0.124791
	1.31e-05	0.708948	0.068876	0.118679
	1.31e-05	0.589846	0.063019	0.093234
	1.32e-05	0.598378	0.058892	0.110963
	1.32e-05	0.501572	0.062091	0.074105
	1.33e-05	0.576468	0.075299	0.117915
	1.34e-05	0.551047	0.082497	0.120613
	1.34e-05	0.492989	0.074817	0.124434
	1.35e-05	0.516663	0.068307	0.155378
	1.35e-05	0.534472	0.060716	0.110335
	1.36e-05	0.49771	0.051904	0.082643
	1.37e-05	0.517035	0.056216	0.119999
	1.37e-05	0.503639	0.077335	0.108504
	1.38e-05	0.51373	0.100789	0.102445
	1.39e-05	0.480112	0.103818	0.082444
	1.39e-05	0.446819	0.110661	0.118942
	1.4e-05	0.549737	0.074466	0.072621
	1.4e-05	0.582288	0.055226	0.056449
	1.41e-05	0.630182	0.048858	0.085446
	1.42e-05	0.568123	0.052599	0.181667
	1.42e-05	0.646082	0.065242	0.131205
	1.43e-05	0.507234	0.091024	0.104375
	1.43e-05	0.473725	0.087975	0.078934
	1.44e-05	0.523469	0.091683	0.202692
	1.45e-05	0.528943	0.082307	0.125759
	1.45e-05	0.510301	0.065903	0.105582
	1.46e-05	0.380602	0.048775	0.119561
	1.46e-05	0.455218	0.058878	0.157991
	1.47e-05	0.425557	0.056559	0.120757
	1.48e-05	0.494707	0.06566	0.142372
	1.48e-05	0.409211	0.066686	0.207964
	1.49e-05	0.42172	0.068363	0.136886
	1.49e-05	0.435762	0.080588	0.129297
	1.5e-05	0.362283	0.09125	0.153965
	1.51e-05	0.411402	0.089225	0.194888
	1.51e-05	0.440127	0.094749	0.156461
	1.52e-05	0.430209	0.097649	0.173861
	1.52e-05	0.461344	0.098989	0.230618
	1.53e-05	0.450243	0.102666	0.253633
	1.54e-05	0.470866	0.096125	0.235804
	1.54e-05	0.562294	0.078848	0.255496
	1.55e-05	0.592885	0.074187	0.336664
	1.55e-05	0.558691	0.076772	0.244674
	1.56e-05	0.622093	0.08658	0.260837
	1.57e-05	0.612527	0.090241	0.299913
	1.57e-05	0.664957	0.102987	0.350177
	1.58e-05	0.680629	0.111501	0.271194
	1.58e-05	0.688784	0.128965	0.322574
	1.59e-05	0.61306	0.141468	0.3563
	1.6e-05	0.715792	0.159758	0.184046
	1.6e-05	0.736157	0.157827	0.236918
	1.61e-05	0.688009	0.178708	0.267546
	1.61e-05	0.693156	0.14554	0.309712
	1.62e-05	0.776957	0.142762	0.246346
	1.63e-05	0.648415	0.135836	0.295559
	1.63e-05	0.619348	0.152459	0.302152
	1.64e-05	0.619408	0.176995	0.322313
	1.64e-05	0.686475	0.207535	0.235588
	1.65e-05	0.856181	0.258827	0.259533
	1.66e-05	0.70286	0.295677	0.352606
	1.66e-05	0.637169	0.36594	0.496408
	1.67e-05	0.556381	0.423411	0.510335
	1.67e-05	0.372941	0.438022	0.468759
	1.68e-05	0.247022	0.458651	0.450928
	1.69e-05	0.225115	0.4853	0.561483
	1.69e-05	0.157104	0.483473	0.527643
	1.7e-05	0.133662	0.514388	0.444227
	1.7e-05	0.113535	0.546405	0.560347
	1.71e-05	0.095081	0.560545	0.606906
	1.72e-05	0.100321	0.594804	0.768953
	1.72e-05	0.058846	0.674531	0.870765
	1.73e-05	0.060537	0.803338	1
	1.73e-05	0.079016	0.923797	0.913304
	1.74e-05	0.068776	1	0.936371
	1.75e-05	0.039729	0.995262	0.825043
	1.75e-05	0.063555	0.839398	0.635572
	1.76e-05	0.065356	0.67136	0.454158
	1.76e-05	0.055478	0.500193	0.398448
	1.77e-05	0.064957	0.36937	0.290341
	1.78e-05	0.029488	0.292589	0.169951
	1.78e-05	0.035146	0.207692	0.132541
	1.79e-05	0.039292	0.169553	0.150817
	1.79e-05	0.052751	0.121063	0.179846
	1.8e-05	0.035861	0.095725	0.164397
	1.81e-05	0.042196	0.069114	0.07624
	1.81e-05	0.044036	0.063548	0.101119
	1.82e-05	0.040199	0.05688	0.073925
	1.82e-05	0.042032	0.061943	0.078516
	1.83e-05	0.037546	0.05379	0.072051
	1.84e-05	0.030001	0.058645	0.070811
	1.84e-05	0.017765	0.054597	0.093754
	1.85e-05	0.035912	0.052649	0.100186
	1.85e-05	0.062024	0.04585	0.075685
	1.86e-05	0.046416	0.045111	0.059974
