# Supplementary material for: RNF43 inhibits WNT5A-driven signaling and suppresses melanoma invasion and resistance to the targeted therapy
Source: eLife. 2021 Oct 27;10:e65759. doi: 10.7554/eLife.65759 (PMC8550759; doi:10.7554/eLife.65759)
Supplement: Figure 2—source data 1. [file elife-65759-fig2-data1.xlsx]

## Sheet: Sheet1
B'		VANGL2	RNF43	DNA			D'		DNA	ROR1	RNF43
	0	0.0102	0.004665	0.009773				0	3.05017	21.3973	19.3804
	3.61e-08	0.016961	0.03124	0.053339				3.01e-08	4.03133	20.5054	22.092
	7.22e-08	0.005785	0.007739	0.024097				6.01e-08	2.44529	18.4195	32.1927
	1.08e-07	0.005659	0.013417	0.021374				9.02e-08	4.95809	18.3954	20.5941
	1.44e-07	0.005659	0.013558	0.083991				1.2e-07	3.90388	21.3216	21.4195
	1.8e-07	0.008829	0.024843	0.004943				1.5e-07	2.63292	24.4513	17.8052
	2.16e-07	0.01686	0.007186	0.045863				1.8e-07	3.4353	25.8546	17.2533
	2.53e-07	0.01316	0.010207	0.017059				2.1e-07	1.4562	27.7125	27.7748
	2.89e-07	0.006005	0.01329	0.04123				2.4e-07	0.530833	26.2553	32.4239
	3.25e-07	0.009567	0.021507	0.031749				2.7e-07	2.19126	26.6277	29.1345
	3.61e-07	0.008306	0.014354	0.036566				3.01e-07	2.16966	29.9231	27.6139
	3.97e-07	0.005752	0.014763	0.045215				3.31e-07	6.75992	28.9356	31.4455
	4.33e-07	0.015558	0.025334	0.081334				3.61e-07	6.47783	26.2726	27.6212
	4.69e-07	0.014978	0.013253	0.011499				3.91e-07	3.02382	35.3983	43.8806
	5.05e-07	0.01343	0.005198	0.028733				4.21e-07	0.089303	36.3471	38.6304
	5.41e-07	0.011882	0.004519	0.029346				4.51e-07	1.01262	25.0182	38.8417
	5.77e-07	0.026683	0.012423	0.0812				4.81e-07	3.40411	25.5853	34.8017
	6.13e-07	0.014846	0.007892	0.041897				5.11e-07	2.92338	32.1895	28.7361
	6.49e-07	0.010427	0.00578	0.004176				5.41e-07	2.89248	31.1703	30.1179
	6.86e-07	0.015288	0.023676	0.020423				5.71e-07	5.0944	30.5792	27.2277
	7.22e-07	0.027829	0.025298	0.003272				6.01e-07	2.98052	36.2261	28.8305
	7.58e-07	0.018527	0.012774	0.025279				6.31e-07	3.87643	31.1547	28.8741
	7.94e-07	0.007636	0.013589	0.025564				6.61e-07	4.05478	30.2727	31.7469
	8.3e-07	0.010695	0.013558	0.058164				6.91e-07	2.72661	33.1647	27.5913
	8.66e-07	0.044359	0.012071	0.017691				7.21e-07	1.09545	30.0871	37.3464
	9.02e-07	0.023631	0.021459	0.067457				7.51e-07	1.62906	33.3263	37.1525
	9.38e-07	0.038287	0.033348	0.03684				7.81e-07	7.458	47.8165	27.746
	9.74e-07	0.043009	0.017983	0.023864				8.11e-07	13.1436	43.5124	40.9625
	1.01e-06	0.015084	0.025486	0.019629				8.41e-07	10.966	42.3897	31.4068
	1.05e-06	0.020075	0.022727	0.03453				8.72e-07	2.02176	43.5483	39.4608
	1.08e-06	0.014705	0.020308	0.040706				9.02e-07	1.77926	46.4257	39.3729
	1.12e-06	0.040457	0.029307	0.08508				9.32e-07	1.45388	56.2662	43.3349
	1.15e-06	0.071872	0.049771	0.031168				9.62e-07	1.57568	48.691	41.3338
	1.19e-06	0.042706	0.051595	0.0181				9.92e-07	3.55609	59.4072	53.6684
	1.23e-06	0.101441	0.040646	0.007368				1.02e-06	4.45447	72.7499	50.6927
	1.26e-06	0.071169	0.050348	0.004444				1.05e-06	5.61352	84.3584	52.449
	1.3e-06	0.071557	0.074213	0.002229				1.08e-06	3.41194	92.6056	64.3271
	1.34e-06	0.058657	0.08865	0.016768				1.11e-06	3.20421	100.151	76.0921
	1.37e-06	0.068053	0.066011	0.053433				1.14e-06	4.43601	114.098	85.2501
	1.41e-06	0.086815	0.064991	0.042001				1.17e-06	5.89817	129.802	89.476
	1.44e-06	0.275426	0.086651	0.025964				1.2e-06	6.61032	143.666	99.2249
	1.48e-06	0.350565	0.099811	0.092599				1.23e-06	13.7767	149.367	105.816
	1.52e-06	0.425838	0.176704	0.05154				1.26e-06	1.65676	145.28	99.3771
	1.55e-06	0.584457	0.28763	0.021544				1.29e-06	5.85379	143.297	110.274
	1.59e-06	0.634202	0.32585	0.008462				1.32e-06	8.82298	154.212	119.943
	1.62e-06	0.708863	0.367651	0.015207				1.35e-06	2.87348	141.207	110.46
	1.66e-06	0.908968	0.452129	0.036231				1.38e-06	6.6663	139.419	103.879
	1.7e-06	1	0.499149	0.032268				1.41e-06	4.11961	132.142	92.8415
	1.73e-06	0.935627	0.532331	0.010821				1.44e-06	5.02057	134.677	99.4743
	1.77e-06	0.653766	0.609369	0.08045				1.47e-06	8.88863	124.959	93.6453
	1.8e-06	0.499636	0.680881	0.105354				1.5e-06	9.68827	117.183	88.1907
	1.84e-06	0.462619	0.674424	0.075039				1.53e-06	4.94357	127.507	101.038
	1.88e-06	0.41696	0.734999	0.082187				1.56e-06	7.80428	117.438	118.124
	1.91e-06	0.383754	0.810031	0.105432				1.59e-06	5.71104	113.3	102.484
	1.95e-06	0.324281	0.719472	0.040747				1.62e-06	2.78273	106.457	116.809
	1.98e-06	0.33645	0.606998	0.050252				1.65e-06	1.72832	112.473	95.8615
	2.02e-06	0.239611	0.619663	0.041316				1.68e-06	4.83967	94.4572	108.937
	2.06e-06	0.263218	0.672577	0.057693				1.71e-06	6.85908	94.8494	111.772
	2.09e-06	0.343621	0.703402	0.087235				1.74e-06	3.50733	88.445	109.823
	2.13e-06	0.342385	0.687552	0.071397				1.77e-06	5.4771	73.9122	105.816
	2.16e-06	0.279969	0.665988	0.11373				1.8e-06	7.05785	70.8877	114.373
	2.2e-06	0.201645	0.636651	0.147586				1.83e-06	9.99082	61.2113	96.119
	2.24e-06	0.229468	0.684429	0.237292				1.86e-06	11.6276	46.6904	88.7133
	2.27e-06	0.265995	0.692093	0.287429				1.89e-06	10.1553	41.099	87.0857
	2.31e-06	0.177937	0.60287	0.251336				1.92e-06	8.86612	26.4075	88.554
	2.35e-06	0.154911	0.552974	0.251551				1.95e-06	12.3498	16.9204	92.1571
	2.38e-06	0.17017	0.525262	0.283599				1.98e-06	1.12955	22.4558	55.8383
	2.42e-06	0.241277	0.480066	0.32291				2.01e-06	5.17885	16.0415	55.2692
	2.45e-06	0.300723	0.431595	0.314114				2.04e-06	0.582458	20.6491	63.52
	2.49e-06	0.227013	0.425594	0.397138				2.07e-06	5.9308	13.1989	59.2407
	2.53e-06	0.225897	0.376251	0.468817				2.1e-06	14.0803	14.6415	55.9659
	2.56e-06	0.297521	0.328778	0.448065				2.13e-06	9.99283	13.9923	63.3491
	2.6e-06	0.255887	0.351718	0.487946				2.16e-06	7.74832	14.701	64.1458
	2.63e-06	0.187828	0.361655	0.570147				2.19e-06	9.00705	14.246	57.2454
	2.67e-06	0.122225	0.340609	0.485122				2.22e-06	9.05977	17.7689	58.3838
	2.71e-06	0.140493	0.337738	0.508589				2.25e-06	6.3334	17.7864	43.692
	2.74e-06	0.203064	0.318567	0.556461				2.28e-06	3.79488	17.3536	33.1789
	2.78e-06	0.142278	0.310528	0.497386				2.31e-06	10.152	14.8069	40.2353
	2.81e-06	0.084847	0.362038	0.556454				2.34e-06	13.0618	14.0448	54.5147
	2.85e-06	0.092816	0.363962	0.555633				2.37e-06	14.9973	13.6288	55.5059
	2.89e-06	0.082365	0.306214	0.451448				2.4e-06	3.67365	16.896	38.0154
	2.92e-06	0.088706	0.275847	0.445343				2.43e-06	9.32141	19.8401	42.5384
	2.96e-06	0.103188	0.315987	0.380461				2.46e-06	5.70727	16.1333	56.0598
	2.99e-06	0.115262	0.300423	0.35053				2.49e-06	9.53433	18.5054	44.8429
	3.03e-06	0.112616	0.281535	0.347454				2.52e-06	7.72553	20.9038	45.2153
	3.07e-06	0.111527	0.270075	0.327324				2.55e-06	6.66777	18.2598	44.7396
	3.1e-06	0.105357	0.256108	0.480319				2.58e-06	13.077	19.3801	43.2021
	3.14e-06	0.128892	0.26981	0.395762				2.61e-06	9.60755	18.4427	53.764
	3.18e-06	0.05353	0.217252	0.329941				2.64e-06	12.2074	17.4527	52.3335
	3.21e-06	0.053662	0.236622	0.323945				2.67e-06	12.7197	21.4853	50.1265
	3.25e-06	0.048923	0.265259	0.344138				2.7e-06	5.6077	22.2309	52.0459
	3.28e-06	0.063655	0.292163	0.345512				2.73e-06	5.05187	22.4324	52.8607
	3.32e-06	0.144027	0.288112	0.413058				2.76e-06	2.98294	15.7378	49.3367
	3.36e-06	0.107136	0.256328	0.483222				2.79e-06	21.6691	17.1702	43.2057
	3.39e-06	0.069319	0.226384	0.242267				2.82e-06	13.277	24.4064	42.7515
	3.43e-06	0.145586	0.227046	0.351751				2.85e-06	4.64883	18.1461	45.3699
	3.46e-06	0.104998	0.279117	0.39817				2.89e-06	4.97637	14.5979	37.4025
	3.5e-06	0.088031	0.249674	0.387277				2.92e-06	8.53549	17.5474	42.2827
	3.54e-06	0.105529	0.223378	0.291422				2.95e-06	10.6425	19.0046	34.517
	3.57e-06	0.198829	0.18416	0.349317				2.98e-06	19.7933	17.7592	22.8246
	3.61e-06	0.119177	0.219431	0.360229				3.01e-06	13.2066	18.0345	29.9605
	3.64e-06	0.055407	0.205825	0.441647				3.04e-06	6.14448	20.2653	34.2639
	3.68e-06	0.093297	0.225223	0.37539				3.07e-06	13.4665	18.3495	41.6897
	3.72e-06	0.074172	0.217142	0.325634				3.1e-06	12.9987	17.1786	47.596
	3.75e-06	0.061087	0.190801	0.414856				3.13e-06	8.93357	15.7491	33.8899
	3.79e-06	0.07064	0.193839	0.477919				3.16e-06	7.33432	15.7255	41.6392
	3.82e-06	0.137564	0.194224	0.564936				3.19e-06	5.81604	17.0324	32.4359
	3.86e-06	0.056841	0.21344	0.495219				3.22e-06	26.7451	16.0727	36.2221
	3.9e-06	0.042484	0.17293	0.535445				3.25e-06	12.0902	14.5177	33.1148
	3.93e-06	0.095731	0.210692	0.369633				3.28e-06	3.8143	15.7575	30.9045
	3.97e-06	0.117847	0.226882	0.373915				3.31e-06	7.7274	19.3646	36.8187
	4.01e-06	0.098379	0.187361	0.533354				3.34e-06	8.80641	21.7015	48.8973
	4.04e-06	0.106738	0.20192	0.446715				3.37e-06	11.5597	21.4423	53.4938
	4.08e-06	0.050721	0.233648	0.427913				3.4e-06	13.4961	22.0259	41.3459
	4.11e-06	0.038347	0.216045	0.397843				3.43e-06	11.7513	20.6884	47.0156
	4.15e-06	0.093128	0.163913	0.643834				3.46e-06	13.202	19.6244	49.8503
	4.19e-06	0.073148	0.198818	0.438427				3.49e-06	15.6717	20.7079	52.3875
	4.22e-06	0.084638	0.241628	0.635178				3.52e-06	10.3029	15.9847	55.9149
	4.26e-06	0.061284	0.159278	0.638223				3.55e-06	6.49325	19.335	63.4245
	4.29e-06	0.025633	0.161854	0.581813				3.58e-06	3.16279	24.1904	50.052
	4.33e-06	0.129893	0.140532	0.681832				3.61e-06	9.40033	27.3527	56.6454
	4.37e-06	0.02045	0.165735	0.670868				3.64e-06	1.93388	24.8952	47.1882
	4.4e-06	0.081248	0.129544	0.554663				3.67e-06	8.33582	32.09	49.1779
	4.44e-06	0.062255	0.156135	0.694547				3.7e-06	10.3952	35.0453	69.4574
	4.47e-06	0.117625	0.161392	0.603966				3.73e-06	8.23358	30.4416	59.4521
	4.51e-06	0.065599	0.178283	0.613363				3.76e-06	9.88517	28.1934	66.4125
	4.55e-06	0.02424	0.181059	0.609721				3.79e-06	10.6176	34.4055	59.6357
	4.58e-06	0.049444	0.159109	0.611291				3.82e-06	6.03377	38.0952	42.4723
	4.62e-06	0.057676	0.146138	0.723925				3.85e-06	3.02216	39.7513	45.4363
	4.65e-06	0.062493	0.206688	0.794223				3.88e-06	4.22288	39.215	56.8454
	4.69e-06	0.101534	0.159127	0.736374				3.91e-06	2.91322	38.3117	67.9268
	4.73e-06	0.052186	0.174616	0.82194				3.94e-06	11.0506	31.1084	64.3293
	4.76e-06	0.08838	0.229533	0.647675				3.97e-06	13.3755	29.2421	83.3036
	4.8e-06	0.046558	0.181341	0.63145				4e-06	9.15361	28.2891	64.2035
	4.84e-06	0.093139	0.209757	0.696638				4.03e-06	9.28567	35.9309	59.794
	4.87e-06	0.09312	0.255601	0.826425				4.06e-06	9.96005	28.8636	72.3103
	4.91e-06	0.111054	0.306344	0.811351				4.09e-06	5.8849	31.6442	70.365
	4.94e-06	0.121035	0.221226	0.863022				4.12e-06	8.28146	35.1151	58.9378
	4.98e-06	0.052508	0.239018	0.62299				4.15e-06	10.952	35.8925	46.4166
	5.02e-06	0.040039	0.263551	0.595695				4.18e-06	10.2156	32.985	50.1564
	5.05e-06	0.088315	0.22497	0.730625				4.21e-06	8.35102	30.6033	61.2408
	5.09e-06	0.091323	0.195312	0.717942				4.24e-06	12.5356	31.4295	65.209
	5.12e-06	0.050818	0.236309	0.666879				4.27e-06	14.2581	30.7789	54.4879
	5.16e-06	0.059461	0.199498	0.872242				4.3e-06	9.69615	28.0895	48.7387
	5.2e-06	0.08474	0.274702	0.670618				4.33e-06	18.2012	29.8216	55.5078
	5.23e-06	0.071069	0.22359	0.797712				4.36e-06	10.0145	38.7349	48.0233
	5.27e-06	0.086401	0.226436	0.750271				4.39e-06	9.75644	25.1831	67.9286
	5.3e-06	0.090856	0.221713	0.516572				4.42e-06	9.02494	27.0087	53.8107
	5.34e-06	0.069393	0.221284	0.543802				4.45e-06	11.8729	32.394	35.4435
	5.38e-06	0.073255	0.204676	0.605225				4.48e-06	13.884	33.5695	47.8053
	5.41e-06	0.032371	0.26285	0.74577				4.51e-06	14.8238	29.3874	51.7798
	5.45e-06	0.0395	0.300284	0.703678				4.54e-06	10.2338	35.7813	44.3288
	5.48e-06	0.040243	0.207257	0.670434				4.57e-06	16.6714	36.2644	44.315
	5.52e-06	0.067503	0.205218	0.695941				4.6e-06	12.5075	32.5421	39.8691
	5.56e-06	0.106264	0.209533	0.655053				4.63e-06	5.41126	32.2078	45.3506
	5.59e-06	0.0505	0.232909	0.658891				4.66e-06	8.98052	34.0157	54.1741
	5.63e-06	0.083776	0.267328	0.813598				4.69e-06	10.3023	30.9896	44.6695
	5.67e-06	0.067762	0.265578	0.857641				4.72e-06	10.5934	28.916	40.3212
	5.7e-06	0.025869	0.195082	0.658262				4.75e-06	12.0292	28.6118	55.6534
	5.74e-06	0.046113	0.214036	0.593487				4.78e-06	19.3935	28.8807	26.3862
	5.77e-06	0.061127	0.21574	0.646152				4.81e-06	6.24924	30.2908	35.4564
	5.81e-06	0.076745	0.178898	0.600602				4.84e-06	6.52058	30.7289	26.7474
	5.85e-06	0.087341	0.160939	0.589198				4.87e-06	10.5772	24.9733	27.4913
	5.88e-06	0.124218	0.239922	0.623514				4.9e-06	12.708	23.8924	36.057
	5.92e-06	0.088338	0.260202	0.527866				4.93e-06	15.5246	20.9687	38.9854
	5.95e-06	0.045936	0.242568	0.586597				4.96e-06	11.8464	20.6702	29.1287
	5.99e-06	0.034492	0.246722	0.711408				4.99e-06	16.2334	21.9772	37.8505
	6.03e-06	0.051748	0.242232	0.698071				5.02e-06	17.7676	22.531	45.8374
	6.06e-06	0.031277	0.207108	0.629814				5.05e-06	8.60892	22.6955	37.2995
	6.1e-06	0.072462	0.210692	0.604551				5.08e-06	12.7542	20.2304	29.4825
	6.13e-06	0.121501	0.219057	0.492722				5.11e-06	13.3391	17.5578	29.2944
	6.17e-06	0.111937	0.221504	0.59092				5.14e-06	18.3037	15.6381	30.5959
	6.21e-06	0.087436	0.206648	0.915067				5.17e-06	18.6684	20.6461	36.1912
	6.24e-06	0.093438	0.219243	0.743965				5.2e-06	16.3655	21.8136	35.3323
	6.28e-06	0.075323	0.223357	0.50149				5.23e-06	10.7287	19.523	41.6771
	6.31e-06	0.082648	0.212414	0.507116				5.26e-06	11.4014	16.2161	40.5885
	6.35e-06	0.063466	0.222395	0.567124				5.29e-06	11.1871	19.8763	38.8945
	6.39e-06	0.055657	0.269464	0.739983				5.32e-06	18.5825	22.8367	44.4422
	6.42e-06	0.05837	0.267095	0.793179				5.35e-06	14.3194	17.7362	40.5807
	6.46e-06	0.048743	0.26777	0.71395				5.38e-06	11.7209	19.5039	30.8494
	6.49e-06	0.072313	0.25672	0.513988				5.41e-06	12.1021	18	29.5616
	6.53e-06	0.066354	0.226753	0.664481				5.44e-06	11.5603	18.2392	28.4839
	6.57e-06	0.059074	0.244407	0.790402				5.47e-06	16.0379	18.3713	38.9445
	6.6e-06	0.075889	0.224674	0.605323				5.5e-06	12.2239	18.9489	33.1542
	6.64e-06	0.06473	0.22134	0.716797				5.53e-06	12.9147	15.5459	34.4236
	6.68e-06	0.097982	0.222788	0.786375				5.56e-06	9.7754	12.7586	41.8712
	6.71e-06	0.098633	0.222268	0.778201				5.59e-06	4.62773	15.3119	36.1356
	6.75e-06	0.085963	0.203021	0.838717				5.62e-06	8.17884	9.92222	45.8005
	6.78e-06	0.10245	0.191028	0.876693				5.65e-06	13.8732	9.76925	43.6251
	6.82e-06	0.075477	0.243345	0.8807				5.68e-06	12.6819	11.4685	45.6279
	6.86e-06	0.092876	0.23894	0.839751				5.71e-06	15.5875	14.7114	46.087
	6.89e-06	0.096978	0.240323	0.871978				5.74e-06	14.9838	13.5497	38.9406
	6.93e-06	0.098672	0.226079	0.862977				5.77e-06	15.2599	13.227	43.6773
	6.96e-06	0.081431	0.216304	0.969835				5.8e-06	13.037	13.611	47.7091
	7e-06	0.100205	0.256023	0.960231				5.83e-06	16.5886	13.2217	44.4822
	7.04e-06	0.133785	0.226604	0.97778				5.86e-06	11.2249	13.6575	61.6792
	7.07e-06	0.14572	0.231654	1				5.89e-06	11.8667	17.7452	57.3154
	7.11e-06	0.180955	0.261002	0.824738				5.92e-06	12.4784	18.0013	58.3672
	7.14e-06	0.135528	0.26828	0.754592				5.95e-06	16.2801	18.9228	56.6067
	7.18e-06	0.091155	0.261759	0.701446				5.98e-06	24.3831	14.6789	47.4272
	7.22e-06	0.195337	0.246337	0.605803				6.01e-06	27.7707	18.3882	39.5226
	7.25e-06	0.168765	0.261745	0.649806				6.04e-06	35.2743	17.6523	33.6765
	7.29e-06	0.064215	0.298211	0.834621				6.07e-06	39.2259	13.1637	47.0312
	7.32e-06	0.097313	0.268556	0.705453				6.1e-06	37.0906	13.3184	52.5332
	7.36e-06	0.119136	0.2815	0.589382				6.13e-06	39.1911	17.6026	41.0447
	7.4e-06	0.116955	0.25634	0.475734				6.16e-06	52.318	16.7665	39.0222
	7.43e-06	0.11953	0.241881	0.531321				6.19e-06	46.9246	13.5198	50.2325
	7.47e-06	0.067908	0.284972	0.557443				6.22e-06	64.5701	20.1628	53.5912
	7.51e-06	0.113298	0.290846	0.618396				6.25e-06	50.9028	20.4609	62.2355
	7.54e-06	0.155901	0.298045	0.570192				6.28e-06	66.141	18.0872	58.0461
	7.58e-06	0.16381	0.297662	0.589173				6.31e-06	74.2707	16.8143	55.1859
	7.61e-06	0.104417	0.338271	0.670014				6.34e-06	112.431	19.9095	53.3249
	7.65e-06	0.08352	0.281421	0.471631				6.37e-06	108.26	21.3387	64.1409
	7.69e-06	0.144592	0.277689	0.588815				6.4e-06	114.844	20.4161	45.726
	7.72e-06	0.093698	0.262732	0.577399				6.43e-06	125.212	24.9886	44.8944
	7.76e-06	0.097833	0.274919	0.502587				6.46e-06	96.8038	20.8633	44.7802
	7.79e-06	0.136083	0.248015	0.49237				6.49e-06	95.207	21.0428	38.4
	7.83e-06	0.119563	0.246897	0.428096				6.52e-06	110.1	21.2703	44.881
	7.87e-06	0.082506	0.183554	0.595703				6.55e-06	115.014	20.6942	48.4584
	7.9e-06	0.067907	0.206955	0.564811				6.58e-06	100.584	21.5389	48.5588
	7.94e-06	0.072914	0.241859	0.461451				6.61e-06	101.927	17.3	53.0947
	7.97e-06	0.053357	0.260473	0.403378				6.64e-06	88.9385	19.1183	42.6917
	8.01e-06	0.057619	0.227368	0.478963				6.67e-06	103.172	15.829	44.9803
	8.05e-06	0.04249	0.218715	0.57352				6.7e-06	107.224	14.7733	35.0187
	8.08e-06	0.050368	0.248078	0.478275				6.73e-06	118.237	14.1975	33.5672
	8.12e-06	0.061296	0.222535	0.625898				6.76e-06	103.766	11.5704	31.9289
	8.15e-06	0.063516	0.191752	0.81445				6.79e-06	106.058	10.6845	19.177
	8.19e-06	0.026965	0.162831	0.604365				6.82e-06	111.515	8.61763	23.0004
	8.23e-06	0.039911	0.148197	0.545679				6.85e-06	100.144	10.5671	37.9277
	8.26e-06	0.04162	0.224264	0.659353				6.88e-06	104.316	15.0505	37.7561
	8.3e-06	0.0254	0.148756	0.533592				6.91e-06	103.462	13.2783	39.7052
	8.34e-06	0.046455	0.151236	0.769812				6.94e-06	87.2308	11.1639	37.6303
	8.37e-06	0.121074	0.168858	0.420393				6.97e-06	116.107	13.6949	24.0201
	8.41e-06	0.086357	0.153413	0.393056				7e-06	117.019	16.2251	28.9395
	8.44e-06	0.079699	0.139522	0.497557				7.03e-06	147.295	13.5656	31.0917
	8.48e-06	0.027413	0.174818	0.594509				7.06e-06	105.205	12.4893	30.8002
	8.52e-06	0.039798	0.160711	0.565954				7.09e-06	123.99	9.64968	39.9844
	8.55e-06	0.126661	0.154123	0.550448				7.12e-06	97.4936	16.299	37.7673
	8.59e-06	0.034488	0.158179	0.454611				7.15e-06	94.7528	15.8292	29.9913
	8.62e-06	0.025721	0.169208	0.580148				7.18e-06	74.4902	13.0314	26.0583
	8.66e-06	0.079662	0.117952	0.583473				7.21e-06	95.5971	16.4195	36.5115
	8.7e-06	0.057058	0.152465	0.600896				7.24e-06	105.621	14.0398	29.6575
	8.73e-06	0.097198	0.153281	0.423931				7.27e-06	83.5012	14.7035	29.0366
	8.77e-06	0.042812	0.134978	0.574339				7.3e-06	86.2353	15.4935	40.4487
	8.8e-06	0.104193	0.158333	0.422847				7.33e-06	105.718	10.7159	56.2129
	8.84e-06	0.018458	0.174667	0.475694				7.36e-06	87.1006	11.0849	56.1964
	8.88e-06	0.033886	0.148597	0.455249				7.39e-06	91.0191	13.2067	38.2955
	8.91e-06	0.037749	0.141619	0.57133				7.42e-06	109.594	17.8508	38.6389
	8.95e-06	0.094751	0.154814	0.43997				7.45e-06	74.1023	20.0147	48.826
	8.98e-06	0.066246	0.162871	0.500994				7.48e-06	80.0789	21.7393	35.5512
	9.02e-06	0.113366	0.141834	0.40945				7.51e-06	68.2051	18.9115	53.9743
	9.06e-06	0.053868	0.117637	0.618418				7.54e-06	66.4029	16.4281	40.2045
	9.09e-06	0.048618	0.147234	0.528952				7.57e-06	107.692	18.6072	44.2007
	9.13e-06	0.082236	0.157218	0.725154				7.6e-06	104.133	18.3045	45.9119
	9.17e-06	0.090546	0.176325	0.369102				7.63e-06	85.7831	19.3246	40.4055
	9.2e-06	0.086012	0.156322	0.533395				7.66e-06	74.2074	19.3806	33.1808
	9.24e-06	0.05636	0.14981	0.441619				7.69e-06	91.0541	17.3008	34.8738
	9.27e-06	0.075477	0.134581	0.576985				7.72e-06	93.7338	14.416	41.5552
	9.31e-06	0.020419	0.108228	0.523956				7.75e-06	92.3928	11.4265	31.469
	9.35e-06	0.020366	0.138737	0.526593				7.78e-06	101.553	8.53538	24.1844
	9.38e-06	0.017452	0.162376	0.465303				7.81e-06	84.2149	9.25197	27.4188
	9.42e-06	0.021672	0.132215	0.542079				7.84e-06	95.881	11.0779	27.1293
	9.45e-06	0.073537	0.176645	0.612086				7.87e-06	94.2605	17.582	17.1229
	9.49e-06	0.083951	0.180296	0.654255				7.9e-06	104.226	14.1344	29.8837
	9.53e-06	0.060662	0.149821	0.639948				7.93e-06	115.68	14.9729	28.0254
	9.56e-06	0.037061	0.129798	0.514979				7.96e-06	129.904	12.8535	27.341
	9.6e-06	0.061295	0.127509	0.464526				7.99e-06	120.715	16.1091	35.2578
	9.63e-06	0.036284	0.150489	0.563115				8.02e-06	110.989	13.6144	38.9727
	9.67e-06	0.059206	0.188178	0.710962				8.05e-06	108.519	13.1111	34.6611
	9.71e-06	0.078644	0.156892	0.556396				8.08e-06	107.631	13.7773	37.8832
	9.74e-06	0.05359	0.123933	0.603841				8.11e-06	105.316	13.4557	33.0028
	9.78e-06	0.06963	0.114334	0.561927				8.14e-06	134.367	16.3693	35.2089
	9.81e-06	0.107371	0.127407	0.591567				8.17e-06	126.247	12.1397	41.9642
	9.85e-06	0.073035	0.10893	0.630983				8.2e-06	137.318	8.98919	32.3835
	9.89e-06	0.027784	0.109273	0.617384				8.23e-06	132.813	12.4081	36.8226
	9.92e-06	0.039669	0.083565	0.550848				8.26e-06	147.738	10.0124	36.2036
	9.96e-06	0.026759	0.114564	0.520613				8.29e-06	151.442	10.5374	30.1199
	1e-05	0.029341	0.111776	0.533039				8.32e-06	154.335	9.42785	33.8951
	1e-05	0.056719	0.108763	0.402929				8.35e-06	141.474	10.3197	30.0069
	1.01e-05	0.090097	0.150827	0.597164				8.38e-06	116.549	9.60207	26.1108
	1.01e-05	0.043435	0.144995	0.543415				8.41e-06	120.966	13.7636	29.3944
	1.01e-05	0.108859	0.163632	0.40415				8.44e-06	137.076	14.0516	27.5835
	1.02e-05	0.081681	0.14519	0.53559				8.47e-06	132.269	9.83433	24.9047
	1.02e-05	0.070945	0.126544	0.551301				8.5e-06	132.988	9.00384	15.5481
	1.02e-05	0.058359	0.106479	0.578389				8.53e-06	129.165	10.5974	21.7099
	1.03e-05	0.082104	0.106633	0.486287				8.56e-06	123.262	10.7977	25.8139
	1.03e-05	0.082732	0.107535	0.445078				8.59e-06	96.13	8.88444	23.2238
	1.04e-05	0.05107	0.111324	0.529084				8.63e-06	127.012	8.15458	17.9198
	1.04e-05	0.027715	0.133682	0.466937				8.66e-06	102.3	12.0255	17.0679
	1.04e-05	0.041544	0.147504	0.379384				8.69e-06	102.481	11.4704	21.2324
	1.05e-05	0.028161	0.151662	0.420535				8.72e-06	114.051	14.275	23.0882
	1.05e-05	0.046951	0.114344	0.558279				8.75e-06	103.465	12.0631	31.4446
	1.05e-05	0.114285	0.101413	0.58218				8.78e-06	114.389	13.1002	25.0818
	1.06e-05	0.088286	0.118329	0.528619				8.81e-06	118.947	13	25.1055
	1.06e-05	0.114695	0.138647	0.392903				8.84e-06	112.019	12.118	26.0482
	1.06e-05	0.100427	0.137693	0.464037				8.87e-06	101.383	10.963	34.9191
	1.07e-05	0.046216	0.13669	0.466083				8.9e-06	95.7597	7.09917	35.6963
	1.07e-05	0.052297	0.142689	0.548705				8.93e-06	96.253	9.43643	28.3248
	1.08e-05	0.052724	0.112712	0.54549				8.96e-06	93.132	13.6636	26.4953
	1.08e-05	0.091115	0.116355	0.488593				8.99e-06	94.0399	8.65441	32.4933
	1.08e-05	0.111579	0.125116	0.470303				9.02e-06	101.016	12.0505	35.0987
	1.09e-05	0.075477	0.118448	0.604824				9.05e-06	81.3769	16.1223	47.6373
	1.09e-05	0.041667	0.119479	0.614823				9.08e-06	70.0846	16.091	34.8478
	1.09e-05	0.040886	0.120669	0.392547				9.11e-06	86.3942	13.1563	38.9684
	1.1e-05	0.096611	0.147968	0.49174				9.14e-06	98.4239	14.3256	40.017
	1.1e-05	0.088988	0.153606	0.574208				9.17e-06	96.6783	18.3591	44.1072
	1.1e-05	0.069186	0.14379	0.47608				9.2e-06	87.4723	19.97	48.6334
	1.11e-05	0.062412	0.154804	0.509926				9.23e-06	93.5379	22.2434	53.2928
	1.11e-05	0.043828	0.167026	0.668306				9.26e-06	105.396	21.2386	55.8353
	1.11e-05	0.058322	0.157109	0.676232				9.29e-06	103.743	16.5013	56.5189
	1.12e-05	0.072696	0.185769	0.739013				9.32e-06	96.6202	13.3406	54.3841
	1.12e-05	0.130996	0.232419	0.825238				9.35e-06	94.6288	9.70434	53.07
	1.13e-05	0.13047	0.239638	0.712442				9.38e-06	100.272	11.8772	50.4931
	1.13e-05	0.07001	0.240508	0.576289				9.41e-06	106.064	13.3572	47.0449
	1.13e-05	0.081965	0.245136	0.623297				9.44e-06	132.274	8.30865	35.6037
	1.14e-05	0.080337	0.257286	0.677253				9.47e-06	105.389	13.3849	42.4245
	1.14e-05	0.090871	0.283396	0.544282				9.5e-06	95.2418	12.778	52.2536
	1.14e-05	0.047882	0.296346	0.539357				9.53e-06	104.988	13.2763	44.0376
	1.15e-05	0.082135	0.297556	0.497739				9.56e-06	107.717	18.1684	45.3614
	1.15e-05	0.11434	0.348281	0.510471				9.59e-06	123.194	16.0184	57.0794
	1.15e-05	0.110586	0.36505	0.65427				9.62e-06	110.273	15.2933	50.7384
	1.16e-05	0.10288	0.37038	0.758637				9.65e-06	88.1449	13.7645	49.9626
	1.16e-05	0.053262	0.328661	0.791852				9.68e-06	111.616	14.3513	47.869
	1.17e-05	0.076962	0.313021	0.765599				9.71e-06	99.0843	15.046	46.6975
	1.17e-05	0.095889	0.24403	0.497819				9.74e-06	85.2416	15.3668	49.6977
	1.17e-05	0.070112	0.25133	0.592632				9.77e-06	113.945	17.2698	64.8518
	1.18e-05	0.049732	0.291745	0.751808				9.8e-06	90.9269	17.7786	43.0861
	1.18e-05	0.084652	0.250704	0.665599				9.83e-06	126.751	11.8634	30.0006
	1.18e-05	0.062999	0.234547	0.565674				9.86e-06	122.146	9.23763	29.5344
	1.19e-05	0.09785	0.236449	0.61944				9.89e-06	101.507	11.526	34.7698
	1.19e-05	0.079595	0.260619	0.704228				9.92e-06	98.3065	13.2405	38.4224
	1.19e-05	0.076002	0.28139	0.595486				9.95e-06	105.602	14.9037	33.202
	1.2e-05	0.063251	0.265186	0.900845				9.98e-06	102.97	12.5088	38.6116
	1.2e-05	0.059618	0.255283	0.669666				1e-05	100.295	11.3583	36.4196
	1.21e-05	0.051804	0.274503	0.448106				1e-05	106.579	12.7843	41.028
	1.21e-05	0.051091	0.245106	0.651901				1.01e-05	93.7248	13.3243	40.6417
	1.21e-05	0.09399	0.266113	0.639436				1.01e-05	103.01	9.57426	37.0991
	1.22e-05	0.087069	0.256513	0.594626				1.01e-05	110.896	10.9256	35.2085
	1.22e-05	0.070266	0.269221	0.561299				1.02e-05	118.32	15.3302	46.1612
	1.22e-05	0.123247	0.257527	0.616015				1.02e-05	124.115	15.4407	41.9859
	1.23e-05	0.114307	0.234971	0.775849				1.02e-05	87.2904	10.0429	35.5529
	1.23e-05	0.181344	0.220305	0.449518				1.02e-05	104.701	12.8017	57.2924
	1.23e-05	0.198181	0.211104	0.686379				1.03e-05	109.698	10.1207	56.1055
	1.24e-05	0.067851	0.228021	0.717266				1.03e-05	122.943	9.21274	44.2556
	1.24e-05	0.065928	0.189037	0.660248				1.03e-05	110.418	10.992	44.6557
	1.24e-05	0.099308	0.180439	0.666525				1.04e-05	111.68	10.717	28.3812
	1.25e-05	0.066372	0.187184	0.788002				1.04e-05	114.785	9.32964	30.6321
	1.25e-05	0.078171	0.14501	0.357865				1.04e-05	120.202	9.14466	42.2188
	1.26e-05	0.052014	0.154603	0.649566				1.05e-05	126.633	14.302	45.9033
	1.26e-05	0.143217	0.140575	0.657046				1.05e-05	122.06	13.1927	37.6019
	1.26e-05	0.112831	0.151221	0.529606				1.05e-05	112.751	9.84335	32.9304
	1.27e-05	0.110113	0.160637	0.634103				1.05e-05	132.613	15.9487	30.0009
	1.27e-05	0.0995	0.177301	0.554126				1.06e-05	123.275	15.3575	22.437
	1.27e-05	0.091997	0.17112	0.569828				1.06e-05	112.079	18.3442	33.8714
	1.28e-05	0.093571	0.172212	0.584965				1.06e-05	114.215	16.4027	26.4685
	1.28e-05	0.16647	0.152565	0.635723				1.07e-05	93.0408	13.8446	27.5046
	1.28e-05	0.075633	0.172726	0.607404				1.07e-05	107.124	15.8872	23.3798
	1.29e-05	0.156814	0.142707	0.757868				1.07e-05	97.0607	19.6178	24.1166
	1.29e-05	0.163327	0.145395	0.589926				1.08e-05	97.097	16.0734	20.568
	1.3e-05	0.093226	0.202221	0.469014				1.08e-05	97.085	13.394	20.8694
	1.3e-05	0.13336	0.166177	0.508312				1.08e-05	94.452	10.5876	26.9685
	1.3e-05	0.067698	0.219151	0.617265				1.08e-05	97.5416	8.68299	31.4446
	1.31e-05	0.075425	0.110018	0.640195				1.09e-05	85.5817	11.1204	34.7327
	1.31e-05	0.159214	0.195811	0.761362				1.09e-05	76.3216	8.83755	49.6585
	1.31e-05	0.158067	0.280863	0.548591				1.09e-05	84.008	13.7384	37.261
	1.32e-05	0.123835	0.207889	0.71354				1.1e-05	83.6027	8.71744	29.2782
	1.32e-05	0.170529	0.214069	0.621024				1.1e-05	102.829	12.1131	24.7963
	1.32e-05	0.198497	0.307958	0.600595				1.1e-05	96.1835	10.8614	25.1466
	1.33e-05	0.17938	0.318153	0.636124				1.11e-05	109.923	9.60829	23.9088
	1.33e-05	0.213481	0.27336	0.509987				1.11e-05	99.861	11.8918	28.7229
	1.34e-05	0.069004	0.311528	0.455737				1.11e-05	95.9736	14.0464	28.3301
	1.34e-05	0.229396	0.291036	0.368848				1.11e-05	84.0846	17.8574	28.091
	1.34e-05	0.218833	0.338296	0.456128				1.12e-05	84.5592	19.6741	31.3111
	1.35e-05	0.220443	0.352306	0.500969				1.12e-05	77.0779	18.3571	31.2269
	1.35e-05	0.281219	0.373916	0.426831				1.12e-05	86.4205	18.1554	24.9285
	1.35e-05	0.257957	0.451455	0.394752				1.13e-05	81.5864	20.6691	22.7396
	1.36e-05	0.301828	0.465579	0.513932				1.13e-05	90.4709	21.2491	36.3657
	1.36e-05	0.219508	0.467906	0.385985				1.13e-05	68.8431	24.2353	41.4012
	1.36e-05	0.245814	0.305241	0.30888				1.14e-05	72.2128	23.0617	46.8108
	1.37e-05	0.302425	0.408052	0.228479				1.14e-05	72.7548	17.6843	39.4256
	1.37e-05	0.276149	0.324864	0.18274				1.14e-05	72.592	25.554	43.1676
	1.37e-05	0.230852	0.307683	0.166192				1.14e-05	82.1411	19.0516	36.9346
	1.38e-05	0.280044	0.343644	0.108784				1.15e-05	83.5283	17.354	46.4163
	1.38e-05	0.290087	0.425679	0.094759				1.15e-05	77.338	19.3329	39.7543
	1.39e-05	0.197043	0.456999	0.14297				1.15e-05	66.9104	16.6667	41.852
	1.39e-05	0.247681	0.359521	0.156338				1.16e-05	70.704	18.0415	40.4096
	1.39e-05	0.191355	0.332298	0.050212				1.16e-05	73.9934	18.805	22.9214
	1.4e-05	0.256269	0.365194	0.026024				1.16e-05	69.3935	16.3413	20.9696
	1.4e-05	0.16903	0.392992	0.051533				1.17e-05	76.7073	16.6553	25.013
	1.4e-05	0.227879	0.385049	0.080557				1.17e-05	84.0522	17.5344	24.6358
	1.41e-05	0.174077	0.342891	0.104615				1.17e-05	69.9469	17.7604	26.0607
	1.41e-05	0.164643	0.332642	0.086882				1.18e-05	77.1444	22.2758	33.8153
	1.41e-05	0.299388	0.335117	0.03823				1.18e-05	74.8667	16.282	36.785
	1.42e-05	0.228793	0.270769	0.061353				1.18e-05	97.6003	21.3127	43.6537
	1.42e-05	0.194226	0.292251	0.015324				1.18e-05	73.5759	25.214	39.7935
	1.43e-05	0.26818	0.279704	0.118846				1.19e-05	100.079	23.2211	37.1084
	1.43e-05	0.19032	0.270261	0.076282				1.19e-05	95.7335	23.8369	45.4172
	1.43e-05	0.164262	0.242041	0.040664				1.19e-05	76.2894	18.6348	43.48
	1.44e-05	0.201737	0.228746	0.025573				1.2e-05	76.8454	15.55	39.545
	1.44e-05	0.224209	0.239012	0.024486				1.2e-05	80.2181	17.9782	31.4534
	1.44e-05	0.193453	0.253331	0.0161				1.2e-05	78.8324	19.4892	32.7745
	1.45e-05	0.240002	0.267963	0.066915				1.21e-05	90.8512	16.9101	41.8098
	1.45e-05	0.191918	0.279343	0.057119				1.21e-05	91.8313	16.7439	38.761
	1.45e-05	0.189093	0.254901	0.087792				1.21e-05	94.2317	14.6761	38.192
	1.46e-05	0.126694	0.250106	0.103408				1.21e-05	114.976	19.6782	27.2499
	1.46e-05	0.169269	0.2216	0.076827				1.22e-05	104.231	16.9146	36.7395
	1.46e-05	0.155303	0.248823	0.021982				1.22e-05	74.863	14.5949	34.3965
	1.47e-05	0.142512	0.195307	0.098533				1.22e-05	84.7727	14.9868	31.4449
	1.47e-05	0.156516	0.230659	0.113067				1.23e-05	94.5281	15.3818	40.7381
	1.48e-05	0.196677	0.230993	0.085492				1.23e-05	97.7785	13.7379	34.9741
	1.48e-05	0.186288	0.214638	0.087359				1.23e-05	88.7622	17.3987	43.8593
	1.48e-05	0.178301	0.245828	0.042188				1.24e-05	82.2767	25.0478	50.1585
	1.49e-05	0.200366	0.243333	0.020887				1.24e-05	80.7755	25.8844	50.8347
	1.49e-05	0.215252	0.238889	0.045667				1.24e-05	80.5228	28.8091	49.8856
	1.49e-05	0.187722	0.234811	0.053791				1.24e-05	83.5894	25.1326	53.6332
	1.5e-05	0.170839	0.277098	0.12448				1.25e-05	106.46	18.0376	57.6906
	1.5e-05	0.265533	0.297977	0.098101				1.25e-05	76.8756	24.2548	60.2816
	1.5e-05	0.232915	0.271931	0.058121				1.25e-05	86.8945	25.4204	75.2416
	1.51e-05	0.233963	0.261786	0.052471				1.26e-05	98.3543	23.7816	41.9532
	1.51e-05	0.253507	0.296175	0.037074				1.26e-05	106.945	20.7414	47.6317
	1.52e-05	0.245342	0.35243	0.058819				1.26e-05	120.309	24.0972	48.5459
	1.52e-05	0.251478	0.406186	0.06554				1.27e-05	109.784	12.3536	41.8294
	1.52e-05	0.218144	0.354465	0.052332				1.27e-05	94.9527	14.0953	31.9346
	1.53e-05	0.168687	0.283937	0.046683				1.27e-05	86.3496	14.2468	29.3962
	1.53e-05	0.225151	0.297025	0.059748				1.27e-05	100.466	12.2283	28.2665
	1.53e-05	0.249259	0.305098	0.087714				1.28e-05	115.634	16.3533	29.0857
	1.54e-05	0.30212	0.303281	0.08209				1.28e-05	121.775	20.6029	33.8408
	1.54e-05	0.389921	0.302544	0.033123				1.28e-05	99.0509	21.5408	34.0882
	1.54e-05	0.285036	0.365732	0.066142				1.29e-05	101.42	20.1885	30.6023
	1.55e-05	0.219536	0.473105	0.094926				1.29e-05	114.758	26.6426	34.3559
	1.55e-05	0.229754	0.4669	0.056472				1.29e-05	114.2	27.0899	48.2254
	1.56e-05	0.237125	0.411635	0.043435				1.3e-05	106.859	27.3765	34.5821
	1.56e-05	0.275849	0.408862	0.054131				1.3e-05	121.968	27.1806	32.0601
	1.56e-05	0.303322	0.437016	0.05989				1.3e-05	122.027	25.2378	40.3804
	1.57e-05	0.308989	0.430784	0.073921				1.3e-05	98.0245	23.1765	29.2553
	1.57e-05	0.293438	0.418007	0.075647				1.31e-05	101.391	25.3049	28.4723
	1.57e-05	0.351138	0.482705	0.015406				1.31e-05	130.802	20.2777	24.5287
	1.58e-05	0.36923	0.498284	0.01276				1.31e-05	122.612	20.3881	27.9361
	1.58e-05	0.322425	0.538036	0.022324				1.32e-05	106.587	17.3105	31.5423
	1.58e-05	0.272683	0.569459	0.033442				1.32e-05	119.467	24.7977	31.173
	1.59e-05	0.388514	0.553305	0.083561				1.32e-05	114.51	25.5404	18.8444
	1.59e-05	0.453604	0.480038	0.102404				1.33e-05	109.61	19.919	16.1931
	1.59e-05	0.526532	0.442841	0.052089				1.33e-05	107.572	27.0601	23.4048
	1.6e-05	0.592139	0.433523	0.063354				1.33e-05	121.581	30.4327	48.6548
	1.6e-05	0.446064	0.432696	0.09157				1.33e-05	122.282	25.6876	29.601
	1.61e-05	0.455205	0.388449	0.067284				1.34e-05	116.655	21.1429	26.4634
	1.61e-05	0.514083	0.385824	0.093873				1.34e-05	110.319	26.2613	32.88
	1.61e-05	0.503825	0.393881	0.068363				1.34e-05	104.375	22.0184	39.2407
	1.62e-05	0.35133	0.430281	0.02083				1.35e-05	133.767	21.512	35.9509
	1.62e-05	0.479702	0.426143	0.020153				1.35e-05	121.332	23.6196	52.9038
	1.62e-05	0.5519	0.439847	0.031539				1.35e-05	111.776	25.0335	54.4524
	1.63e-05	0.596513	0.448165	0.009142				1.36e-05	97.7586	26.1042	55.4034
	1.63e-05	0.676976	0.424797	0.02673				1.36e-05	107.701	25.8867	49.5234
	1.63e-05	0.788478	0.436757	0.029622				1.36e-05	108.633	25.0308	55.1872
	1.64e-05	0.765306	0.503454	0.018986				1.36e-05	106.431	25.1826	47.4894
	1.64e-05	0.817144	0.529144	0.038828				1.37e-05	93.3971	28.3901	35.8618
	1.65e-05	0.887418	0.482082	0.046352				1.37e-05	88.7741	31.9136	40.3251
	1.65e-05	0.659135	0.57485	0.046098				1.37e-05	121.974	33.7369	30.1571
	1.65e-05	0.591683	0.559312	0.021532				1.38e-05	105.424	23.8102	37.8575
	1.66e-05	0.690958	0.498138	0.063849				1.38e-05	138.118	25.8928	43.3565
	1.66e-05	0.632052	0.582464	0.04108				1.38e-05	107.834	23.6828	33.3113
	1.66e-05	0.528971	0.585706	0.046452				1.39e-05	103.747	19.6285	39.4167
	1.67e-05	0.721322	0.494414	0.027137				1.39e-05	103.799	17.2504	46.3447
	1.67e-05	0.658593	0.515467	0.056101				1.39e-05	109.961	19.3261	42.4519
	1.67e-05	0.488114	0.570485	0.073069				1.39e-05	87.9463	18.1254	37.6048
	1.68e-05	0.561489	0.556981	0.068019				1.4e-05	98.0481	17.5524	41.5416
	1.68e-05	0.643257	0.520866	0.065713				1.4e-05	119.404	17.3881	42.916
	1.69e-05	0.500217	0.438986	0.008902				1.4e-05	118.163	19.1053	38.0959
	1.69e-05	0.531883	0.429339	0.042808				1.41e-05	97.9344	22.059	53.9307
	1.69e-05	0.595638	0.479638	0.037738				1.41e-05	93.6409	25.5245	37.4719
	1.7e-05	0.459706	0.465431	0.07074				1.41e-05	97.5893	21.4885	46.1433
	1.7e-05	0.31365	0.438618	0.015203				1.42e-05	101.019	21.4005	42.8909
	1.7e-05	0.318155	0.44636	0.08554				1.42e-05	99.6512	23.8474	50.1911
	1.71e-05	0.505525	0.435764	0.085296				1.42e-05	95.0537	28.6521	46.624
	1.71e-05	0.42119	0.482785	0.087909				1.42e-05	94.0877	21.3258	48.3246
	1.71e-05	0.424519	0.51725	0.048339				1.43e-05	87.617	26.9357	43.9099
	1.72e-05	0.492223	0.547721	0.045182				1.43e-05	87.5405	32.512	43.1128
	1.72e-05	0.557879	0.60768	0.04346				1.43e-05	73.5784	31.3378	52.4702
	1.72e-05	0.808364	0.556332	0.030396				1.44e-05	79.6868	30.4708	45.0003
	1.73e-05	0.466941	0.532895	0.014828				1.44e-05	83.2494	40.4074	37.351
	1.73e-05	0.530886	0.53135	0.113666				1.44e-05	77.5238	45.44	39.9259
	1.74e-05	0.760206	0.6035	0.020087				1.45e-05	79.8819	42.934	39.4348
	1.74e-05	0.531056	0.665767	0.110799				1.45e-05	61.6201	39.5361	35.5931
	1.74e-05	0.830451	0.593728	0.026594				1.45e-05	77.0357	51.1701	52.2681
	1.75e-05	0.614701	0.731426	0.083586				1.45e-05	74.6151	40.4118	70.7308
	1.75e-05	0.72602	0.666424	0.017376				1.46e-05	73.5926	38.5939	52.9811
	1.75e-05	0.764727	0.75971	0.002758				1.46e-05	72.897	36.7658	56.9617
	1.76e-05	0.555767	0.616768	0.004083				1.46e-05	99.571	30.4539	58.1913
	1.76e-05	0.694419	0.784887	0.0568				1.47e-05	77.1294	38.6647	55.3364
	1.76e-05	0.703305	0.862198	0.017033				1.47e-05	67.5011	34.7084	62.6163
	1.77e-05	0.544566	0.939414	0.047675				1.47e-05	75.0966	28.4953	59.695
	1.77e-05	0.563632	0.89521	0.024096				1.48e-05	63.6794	26.7286	69.1864
	1.78e-05	0.747713	0.948363	0.030772				1.48e-05	39.5235	28.1161	64.166
	1.78e-05	0.660566	0.99321	0.004392				1.48e-05	60.2704	28.282	50.561
	1.78e-05	0.47885	0.966768	0.152197				1.48e-05	57.8306	26.3313	49.8475
	1.79e-05	0.51905	1	0.085588				1.49e-05	80.8506	26.6637	55.8781
	1.79e-05	0.491589	0.792309	0.01536				1.49e-05	55.2948	34.93	57.4648
	1.79e-05	0.636364	0.749979	0.055159				1.49e-05	66.6296	26.8802	52.8691
	1.8e-05	0.747935	0.578109	0.015414				1.5e-05	37.0599	27.0724	75.4551
	1.8e-05	0.543705	0.723436	0.037889				1.5e-05	51.1429	37.4998	58.0997
	1.8e-05	0.72764	0.620669	0.007961				1.5e-05	48.6978	43.1111	65.7966
	1.81e-05	0.595972	0.602039	0.024115				1.51e-05	39.9873	49.5542	64.1711
	1.81e-05	0.501958	0.452954	0.110435				1.51e-05	37.0402	53.6134	70.0207
	1.81e-05	0.5232	0.477921	0.10555				1.51e-05	32.7005	53.0258	78.7831
	1.82e-05	0.474246	0.447414	0.064991				1.51e-05	17.4907	48.7536	94.3316
	1.82e-05	0.540718	0.409145	0.035275				1.52e-05	16.5908	46.6673	91.8991
	1.83e-05	0.42441	0.396235	0.107088				1.52e-05	22.6763	51.9462	63.6073
	1.83e-05	0.395373	0.304553	0.073808				1.52e-05	22.8432	44.9302	61.1951
	1.83e-05	0.271249	0.368121	0.116695				1.53e-05	16.966	46.3191	94.1076
	1.84e-05	0.393158	0.369769	0.091698				1.53e-05	12.1814	56.2267	65.5863
	1.84e-05	0.326418	0.353215	0.060246				1.53e-05	16.3706	56.5976	68.4705
	1.84e-05	0.295051	0.363419	0.028657				1.54e-05	5.88536	67.1722	83.6907
	1.85e-05	0.257785	0.36309	0.027318				1.54e-05	13.0755	76.0685	88.5046
	1.85e-05	0.34828	0.390949	0.051093				1.54e-05	11.3881	95.8358	81.6072
	1.85e-05	0.32344	0.358355	0.052291				1.54e-05	10.9128	91.892	94.8976
	1.86e-05	0.304104	0.363277	0.029688				1.55e-05	11.722	94.6883	87.3881
	1.86e-05	0.434868	0.388429	0.06856				1.55e-05	15.794	99.9203	79.4663
	1.87e-05	0.299957	0.337962	0.020672				1.55e-05	14.8377	114.453	82.0841
	1.87e-05	0.399168	0.433821	0.032641				1.56e-05	4.89938	116.735	83.7223
	1.87e-05	0.443597	0.397565	0.029923				1.56e-05	4.32684	104.167	78.9083
	1.88e-05	0.446213	0.400737	0.071791				1.56e-05	4.73616	102.294	79.4607
	1.88e-05	0.507552	0.376171	0.034272				1.57e-05	11.655	81.8258	94.4098
	1.88e-05	0.481805	0.412223	0.008436				1.57e-05	5.06126	96.162	71.6306
	1.89e-05	0.536359	0.387168	0.000349				1.57e-05	14.0823	105.544	56.6357
	1.89e-05	0.435318	0.362146	0.045498				1.57e-05	3.69857	101.064	57.0684
	1.89e-05	0.621314	0.46225	0.054897				1.58e-05	4.16833	111.108	56.2869
	1.9e-05	0.539001	0.458493	0.060267				1.58e-05	5.75526	131.738	65.3782
	1.9e-05	0.400507	0.494537	0.050275				1.58e-05	5.65497	117.664	63.5119
	1.91e-05	0.433395	0.469442	0.075306				1.59e-05	11.1494	114.239	58.9985
	1.91e-05	0.477363	0.495227	0.107346				1.59e-05	11.2515	120.536	65.3527
	1.91e-05	0.530913	0.497058	0.058405				1.59e-05	5.30981	116.348	83.8009
	1.92e-05	0.594055	0.509859	0.024934				1.6e-05	7.9271	121.239	68.1777
	1.92e-05	0.684359	0.534295	0.050501				1.6e-05	7.78237	105.767	65.3122
	1.92e-05	0.639667	0.486887	0.064376				1.6e-05	3.87017	79.0252	73.9843
	1.93e-05	0.662501	0.510733	0.091077				1.6e-05	1.96606	62.9421	89.7531
	1.93e-05	0.647147	0.530408	0.063774				1.61e-05	15.9845	66.9134	78.2001
	1.93e-05	0.609868	0.474321	0.021331				1.61e-05	2.66519	51.66	78.147
	1.94e-05	0.504702	0.51205	0.065528				1.61e-05	5.29117	46.6465	74.2093
	1.94e-05	0.480031	0.555492	0.111363				1.62e-05	3.65594	46.0794	61.6107
	1.94e-05	0.460597	0.495268	0.057517				1.62e-05	5.69488	41.6855	72.2463
	1.95e-05	0.471539	0.439543	0.086769				1.62e-05	3.36033	42.8745	73.0843
	1.95e-05	0.410021	0.468856	0.081334				1.63e-05	5.42911	43.6047	79.5031
	1.96e-05	0.370449	0.503082	0.052793				1.63e-05	8.62926	51.3295	78.5973
	1.96e-05	0.395492	0.465936	0.057191				1.63e-05	8.02154	61.6896	69.3169
	1.96e-05	0.414492	0.543358	0.055778				1.63e-05	5.3029	67.1186	89.9292
	1.97e-05	0.476944	0.577232	0.04589				1.64e-05	4.83792	80.0084	87.782
	1.97e-05	0.47248	0.460888	0.061945				1.64e-05	7.60639	86.7188	87.1307
	1.97e-05	0.559274	0.43688	0.042463				1.64e-05	2.85478	111.801	90.6464
	1.98e-05	0.584116	0.502881	0.032496				1.65e-05	6.68811	128.797	74.7369
	1.98e-05	0.446522	0.521465	0.050333				1.65e-05	1.94972	158.03	91.4302
	1.98e-05	0.373876	0.482564	0.106996				1.65e-05	9.64156	173.915	104.312
	1.99e-05	0.313292	0.452827	0.083524				1.66e-05	9.95222	185.632	98.2566
	1.99e-05	0.348552	0.469948	0.041719				1.66e-05	5.5566	197.634	70.435
								1.66e-05	10.4167	192.919	79.9129
								1.66e-05	11.0208	201.544	95.4131
								1.67e-05	3.06598	198.253	92.8254
								1.67e-05	2.56323	168.535	96.0671
								1.67e-05	4.17892	158.9	98.7269
								1.68e-05	8.93226	140.16	72.3776
								1.68e-05	1.04837	123.346	76.1216
								1.68e-05	2.25447	105.689	68.9883
								1.69e-05	4.51533	95.7436	59.2378
								1.69e-05	8.84952	93.4445	56.6587
								1.69e-05	7.91026	93.2819	66.5915
								1.69e-05	4.98687	91.1879	59.0934
								1.7e-05	6.62473	85.391	64.4215
								1.7e-05	5.1755	99.568	61.7103
								1.7e-05	6.65181	107.522	60.5889
								1.71e-05	8.57273	109.044	59.6224
								1.71e-05	7.0951	108.57	62.935
								1.71e-05	5.89701	109.885	65.4466
								1.72e-05	7.6895	90.4995	73.0458
								1.72e-05	5.66146	101.561	70.3232
								1.72e-05	12	99.7951	84.3537
								1.73e-05	12	91.8464	69.3957
								1.73e-05	9.83716	100.274	81.1456
								1.73e-05	3.24043	88.1148	70.9026
								1.73e-05	3.13473	82.5829	73.5977
								1.74e-05	1.65589	73.3694	65.9518
								1.74e-05	3.53412	70.3444	59.3675
								1.74e-05	2.23915	62.5809	62.5154
								1.75e-05	7.69228	53.102	53.4942
								1.75e-05	13.0646	50.4463	44.7743
								1.75e-05	8.35978	45.6581	56.0414
								1.76e-05	10.7141	43.6155	57.8609
								1.76e-05	3.40598	34.9754	47.3358
								1.76e-05	7.97291	35.7394	42.6938
								1.76e-05	6.36981	27.1742	46.0239
								1.77e-05	11.1063	27.2681	36.6668
								1.77e-05	8.08478	22.8138	40.1529
								1.77e-05	8.26075	18.5889	46.3018
								1.78e-05	5.96298	17.8303	56.7086
								1.78e-05	2.94631	15.0887	46.3232
								1.78e-05	0.124555	13.8485	41.2406
								1.79e-05	2.09368	11.675	45.8075
								1.79e-05	7.79242	7.60331	48.0352
								1.79e-05	3.79215	6.04466	46.0608
								1.79e-05	12.7524	6.87498	53.2548
								1.8e-05	4.77288	7.02484	52.5063
								1.8e-05	4.26392	6.82612	49.2739
								1.8e-05	4.94246	7.55184	56.1882
								1.81e-05	5	3.59422	53.4066
								1.81e-05	14.5554	7.35902	53.8089
								1.81e-05	3.46111	7.67267	46.4669
								1.82e-05	1.75921	7.71404	46.2169
								1.82e-05	4.60124	10.5962	49.203
								1.82e-05	2.65193	12.5612	45.2739
								1.82e-05	3.62593	12.6985	36.2334
								1.83e-05	2.47841	12.29	35.1087
								1.83e-05	5.8574	17.5803	31.8381
								1.83e-05	6.27526	16.5044	34.1126
								1.84e-05	6.86966	18.0348	26.8296
								1.84e-05	3.92695	25.6035	25.2057
								1.84e-05	0.655112	29.5883	32.1171
								1.85e-05	1.05599	26.9117	33.6684
								1.85e-05	7.54772	42.5496	28.4853
								1.85e-05	10.7313	48.9534	27.3699
								1.85e-05	5.25345	52.9812	42.4922
								1.86e-05	4.31844	65.635	38.5757
								1.86e-05	8.63806	75.0297	41.4264
								1.86e-05	7.27079	77.5747	46.6299
								1.87e-05	4.99008	85.2397	45.1064
								1.87e-05	10.3994	93.2309	46.8215
								1.87e-05	6.47232	103.749	66.5798
								1.88e-05	1.1465	108.469	60.7852
								1.88e-05	8.23997	106.104	64.9279
								1.88e-05	7.94754	117.078	50.917
								1.88e-05	2.13139	139.431	50.8089
								1.89e-05	2.31552	150.948	68.9898
								1.89e-05	6.91811	146.434	63.8278
								1.89e-05	3.57611	147.038	58.0568
								1.9e-05	4.44935	156.882	65.4256
								1.9e-05	9.66908	159.062	70.6462
								1.9e-05	8.52106	160.575	77.1401
								1.91e-05	3.65089	163.732	91.6696
								1.91e-05	5.42902	151.492	99.8558
								1.91e-05	7.59837	140.549	93.3097
								1.91e-05	4.80606	154.612	85.2696
								1.92e-05	8.50514	154.546	94.4071
								1.92e-05	8.03555	142.328	122.454
								1.92e-05	7.89766	130.056	125.838
								1.93e-05	6.64752	140.046	142.213
								1.93e-05	3.84513	145.226	158.056
								1.93e-05	2.72808	142.844	158.022
								1.94e-05	7.97682	130.044	169.023
								1.94e-05	7.431	118.242	170.825
								1.94e-05	5.3931	134.502	180.024
								1.94e-05	7.63893	148.827	189.417
								1.95e-05	5.77494	166.201	193.498
								1.95e-05	2.84442	163.286	175.644
								1.95e-05	3.79289	176.871	168.244
								1.96e-05	3.56955	169.461	172.854
								1.96e-05	1.45805	180.849	160.792
								1.96e-05	17.3454	172.516	172.736
								1.97e-05	9.16662	147.14	179.115
								1.97e-05	7.92362	141.903	192.869
								1.97e-05	8.74033	133.73	179.406
								1.97e-05	10.5293	129.151	180.003
								1.98e-05	7.84722	115.999	193.974
								1.98e-05	5.17302	108.533	181.965
								1.98e-05	7.55129	108.839	141.962
								1.99e-05	8.43393	92.4126	125.856
								1.99e-05	3.57136	93.407	115.509
								1.99e-05	4.24454	97.2286	95.8438
								2e-05	1.04523	78.1024	85.9857
								2e-05	3.03931	81.7086	91.1567
								2e-05	9.32911	72.546	80.0172
								2e-05	10.5999	93.8922	79.9345
								2.01e-05	6.6418	93.3278	75.78
								2.01e-05	6.80861	81.6987	95.347
								2.01e-05	4.61023	79.5007	80.1908
								2.02e-05	0.782351	86.7119	80.317
								2.02e-05	10.7226	90.1888	82.4688
								2.02e-05	10.0528	84.7157	96.8256
								2.03e-05	5.77795	84.9167	112.818
								2.03e-05	8.43279	95.3118	119.337
								2.03e-05	8.13187	94.5225	115.482
								2.03e-05	9.7802	80.7557	116.477
								2.04e-05	6.98776	75.9503	100.643
								2.04e-05	11.2937	78.0138	103.31
								2.04e-05	5.30808	75.7062	105.902
								2.05e-05	5.81275	83.807	101.01
								2.05e-05	8.96743	87.579	99.9142
								2.05e-05	3.98646	85.5377	91.8862
								2.06e-05	4.36439	82.7605	88.5744
								2.06e-05	11.4711	77.4404	82.5751
								2.06e-05	16.4445	69.1345	76.618
								2.06e-05	9.45518	69.2507	64.2513
								2.07e-05	8.73902	67.5597	79.4693
								2.07e-05	8.07389	51.416	87.4748
								2.07e-05	6.63626	50.7897	109.018
								2.08e-05	8.79882	46.368	89.2163
								2.08e-05	6.29386	50.4853	120.652
								2.08e-05	3.35743	59.5447	118.029
								2.09e-05	7.64361	60.2576	167.697
								2.09e-05	5.91341	61.5189	151.395
								2.09e-05	8.26317	60.6899	136.523
								2.09e-05	12.2361	68.7435	125.085
								2.1e-05	9.28684	69.3513	130.258
								2.1e-05	2.55928	68.2645	137.07
								2.1e-05	3.83036	72.3552	137.62
								2.11e-05	7.35814	74.5328	153.576
								2.11e-05	4.50387	65.8554	145.205
								2.11e-05	6.62081	73.9879	118.938
								2.12e-05	9.84044	58.9187	122.803
								2.12e-05	2.24543	57.3445	103.485
								2.12e-05	2.95288	57.9522	96.1487
								2.12e-05	9.64341	51.1424	95.8235
								2.13e-05	8.14842	59.4458	99.0787
								2.13e-05	8.22025	63.8618	74.5303
								2.13e-05	5.12884	66.0208	63.8631
								2.14e-05	5.28134	70.5679	69.1337
								2.14e-05	6.34217	83.027	81.4207
								2.14e-05	8.82647	99.3169	65.8928
								2.15e-05	11.5695	101.999	65.3894
								2.15e-05	7.2975	102.748	60.205
								2.15e-05	3.19002	104.955	79.1642
								2.15e-05	14.6517	130.335	59.1218
								2.16e-05	1.98808	141.771	83.0729
								2.16e-05	3.69581	156.962	81.4422
								2.16e-05	7.78129	169.42	106.361
								2.17e-05	7.33593	188.054	106.698
								2.17e-05	5.23713	189.387	119.55
								2.17e-05	6.14891	189.189	136.267
								2.18e-05	11.4335	190.42	149.373
								2.18e-05	12.8836	190.904	179.202
								2.18e-05	13.3015	201.421	159.147
								2.18e-05	7.14422	204.47	156.938
								2.19e-05	8.92827	212.401	178.406
								2.19e-05	2.59933	208.911	201.2
								2.19e-05	8.19934	205.446	136.21
								2.2e-05	4.71378	186.015	109.276
								2.2e-05	4.59229	193.885	131.401
								2.2e-05	7.20245	174.394	113.04
								2.21e-05	7.9651	174.706	121.242
								2.21e-05	9.08259	169.085	135.969
								2.21e-05	5.84909	161.328	145.559
								2.21e-05	4.33686	163.052	152.121
								2.22e-05	6.6352	191.402	149.187
								2.22e-05	8.97979	182.227	162.173
								2.22e-05	5.06379	177.435	164.191
								2.23e-05	3.94639	171.024	138.939
								2.23e-05	4.43466	204.385	128.223
								2.23e-05	3.62273	173.65	119.472
								2.24e-05	1.81701	164.65	122.571
								2.24e-05	4.71164	170.025	124.45
								2.24e-05	2.07475	176.986	108.818
								2.24e-05	9.64738	164.648	98.5513
								2.25e-05	13.1867	155.554	91.2788
								2.25e-05	10.2762	149.533	88.5016
								2.25e-05	7.38928	148.207	82.6863
								2.26e-05	3.93117	153.918	94.6191
								2.26e-05	2.82837	161.883	74.0071
								2.26e-05	0.196293	153.73	94.8388
								2.27e-05	2.01319	150.848	90.5199
								2.27e-05	3.19768	165.53	76.1985
								2.27e-05	7.26273	138.321	72.5841
								2.27e-05	6.53633	147.96	93.1876
								2.28e-05	4.68793	158.215	78.4898
								2.28e-05	1.16434	140.541	81.6537
								2.28e-05	4.43355	121.302	88.0254
								2.29e-05	8.19458	117.819	90.8684
								2.29e-05	5.28977	102.641	85.0875
								2.29e-05	3.04256	92.019	91.74
								2.3e-05	2.49068	92.4576	95.6352
								2.3e-05	4.28725	87.3092	78.5859
								2.3e-05	7.94656	81.4646	103.978
								2.31e-05	6.64967	79.1405	92.4004
								2.31e-05	0.692996	80.1594	102.433
								2.31e-05	8.62554	99.8925	131.485
								2.31e-05	6.65719	97.1562	115.2
								2.32e-05	4.96696	84.3757	119.452
								2.32e-05	5.09957	86.4702	126.614
								2.32e-05	4.90294	91.2798	104.082
								2.33e-05	3.2058	89.2716	117.304
								2.33e-05	2.88858	76.8677	120.418
								2.33e-05	3.04227	73.7473	113.726
								2.34e-05	3.57844	86.7526	117.641
								2.34e-05	1.41668	82.8942	114.083
								2.34e-05	2.76936	82.6652	103.075
								2.34e-05	6.17414	77.4918	106.244
								2.35e-05	1.14119	79.751	108.768
								2.35e-05	3.97307	84.8153	109.079
								2.35e-05	3.34688	83.8016	106.952
								2.36e-05	7.58414	85.8697	122.889
								2.36e-05	4.91034	87.2768	114.334
								2.36e-05	3.24118	79.6803	106.075
								2.37e-05	6.65563	83.3775	104.879
								2.37e-05	4.95897	71.5895	87.7769
								2.37e-05	5.3404	58.5711	75.9346
								2.37e-05	5.57168	61.6981	54.0629
								2.38e-05	0.549065	56.5532	57.1901
								2.38e-05	0.97038	47.5631	50.3609
								2.38e-05	1.52061	48.1488	42.2161
								2.39e-05	8.0732	32.7527	48.3299
								2.39e-05	15.7224	28.4051	40.5143
								2.39e-05	2.09252	29.3744	40.9852
								2.4e-05	6.5262	24.1645	31.3023
								2.4e-05	2.97981	22.7851	29.6424
								2.4e-05	9.03455	19.1727	31.7507
								2.4e-05	2.85739	20.4909	31.4587
								2.41e-05	3.61864	18.3673	32.9814
								2.41e-05	2.43577	17.9178	37.1596
								2.41e-05	1.17859	17.5129	44.017
								2.42e-05	2.07993	14.7113	37.1446
								2.42e-05	4.18688	18.8203	25.4094
								2.42e-05	0.371787	18.8376	37.6794
								2.43e-05	3.21484	24.8085	33.7206
								2.43e-05	1.14618	18.4775	34.062
