# Supplementary material for: RNF43 inhibits WNT5A-driven signaling and suppresses melanoma invasion and resistance to the targeted therapy
Source: eLife. 2021 Oct 27;10:e65759. doi: 10.7554/eLife.65759 (PMC8550759; doi:10.7554/eLife.65759)
Supplement: Figure 3—figure supplement 1—source data 1. [file elife-65759-fig3-figsupp1-data1.xlsx]

## Sheet: Sheet1
B
	0.681534	0.394935	0.162028	0.254132	0.50625	2.72415	0.871389			1.09878	0.427627	0.256681	1.67979	2.17104	3.00251	4.94681			1.97064	0.780744	0.357622	1.90613	2.82671	3.75451	4.90681
	0.366643	0.278936	0.06921	0.27783	0.396791	1.32031	0.855083			1.29241	0.478949	0.223004	1.3356	2.22256	3.40432	4.56471			1.63841	0.89495	0.364764	1.71246	2.47996	3.63455	3.58178
	0.137031	0.545906	0.31258	0.753551	0.745063	1.76798	1.1366			0.489649	1.6172	0.952855	1.95412	2.73263	3.55827	4.74565			0.645743	1.69892	0.86239	2.58881	4.39558	2.89844	2.76669
