# Supplementary material for: RNF43 inhibits WNT5A-driven signaling and suppresses melanoma invasion and resistance to the targeted therapy
Source: eLife. 2021 Oct 27;10:e65759. doi: 10.7554/eLife.65759 (PMC8550759; doi:10.7554/eLife.65759)
Supplement: Figure 3—source data 1. [file elife-65759-fig3-data1.xlsx]

## Sheet: Sheet1
D					E	1	0.696897	0.258443			F	1	0.95874	0.696897	0.889251
	1	2.06074				1	0.718	1.05648				1	0.670383	0.718	0.935889
	1	1.42171				1	0.760778	0.987				1	0.638858	0.760778	0.932871
	1	1.18236				1	0.77574	1.14173				1	1.29552	0.77574	0.806965
	1	1.45527				1	0.546878	1.0171				1	0.959368	0.546878	0.831413
						1	0.741578	0.958924						0.741578
