# Supplementary material for: RNF43 inhibits WNT5A-driven signaling and suppresses melanoma invasion and resistance to the targeted therapy
Source: eLife. 2021 Oct 27;10:e65759. doi: 10.7554/eLife.65759 (PMC8550759; doi:10.7554/eLife.65759)
Supplement: Figure 4—figure supplement 1—source data 1. [file elife-65759-fig4-figsupp1-data1.xlsx]

## Sheet: Sheet1
B					C					E								F								G	pDVL2			total DVL2			H	pDVL3			total DVL3
	Skin	Benign Melanocytic Skin Nevus	Cutaneous Melanoma			Primary Site	Metastasis				A375 WT	+ RNF43	R/Z dKO	A375 IV	+ RNF43	R/Z dKO			A375 WT	+ RNF43	R/Z dKO	A375 IV	+ RNF43	R/Z dKO			DOX -	DOX +		DOX -	DOX +			DOX -	DOX +		DOX -	DOX +
	0.98363	2.36994	2.03857			-0.80245	-0.76382				1	0.338797	0.706946	1	1.06827	2.28953			1	0.379922	0.731042	1	0.564735	1.16255			1	0.491249		1	0.679894			1	0.329215		1	0.705154
	0.46268	2.61759	1.99692			-0.62198	0.535				1	0.426058	1.24796	1	0.755324	1.90497			1	0.288897	0.932884	1	0.507816	1.64398			1	0.440801		1	1.20656			1	0.300038		1	0.939301
	0.02996	1.64731	1.38127			-1.32982	0.7089				1	0.373452	0.985852	1	1.03858	1.71975			1	0.326707	0.697904	1	0.965575	1.93364			1	0.444288		1	0.637432			1	0.538513		1	0.463923
	0.64709	2.16257	1.82112			-0.2069	0.9385				1	0.684702	1.20525	1	0.477442	1.68805			1	0.620157	1.27437	1	0.315124	1.20014			1	0.385704		1	0.724904			1	0.207031		1	2.60614
	0.46543	1.48791	2.26311			0.21812	0.69586				1	0.641724	0.999119	1	0.487982	1.97881			1	0.34877	0.70303	1	0.823735	1.40821
	1.56705	2.54959	2.93739			-0.3173	0.82769				1	0.886867	1.28927	1	0.447789	1.89561			1	0.629356	1.29336	1	0.320351
	0.49916	2.22008	2.19841			-0.0161	0.93976
		3.08776	2.46258				0.65593
		2.56902	2.05607				0.23298
		1.94189	2.22971				-0.20809
		0.78227	2.40226				-0.70974
		2.03132	2.24808				-0.60375
		2.0409	2.26829				-0.32307
		0.24059	1.93144				0.07576
		2.24496	2.40048				0.18084
		-0.46222	2.38967
		1.74118	2.53222
			1.36679
			1.85545
			2.25344
			2.50264
			2.17434
			2.23176
			2.58125
			2.12691
			1.66092
			2.76818
			2.38788
			2.03925
			2.31949
			1.71674
			2.19873
			2.64773
			2.45022
			2.28227
			2.41852
			2.34402
			2.53246
			1.962
			2.48718
			2.57034
			2.28736
			2.41982
			2.26102
			1.739
