# Supplementary material for: RNF43 inhibits WNT5A-driven signaling and suppresses melanoma invasion and resistance to the targeted therapy
Source: eLife. 2021 Oct 27;10:e65759. doi: 10.7554/eLife.65759 (PMC8550759; doi:10.7554/eLife.65759)
Supplement: Figure 4—figure supplement 2—source data 1. [file elife-65759-fig4-figsupp2-data1.xlsx]

## Sheet: Sheet1
A								B								B'								C
	A375 WT	+ RNF43	dKO	A375 IV	+ RNF43	dKO			A375 WT	+ RNF43	dKO	A375 IV	+ RNF43	dKO			A375 WT	+ RNF43	dKO	A375 IV	+ RNF43	dKO			A375 WT	+ RNF43	dKO	A375 IV	+ RNF43	dKO
	0.00326	0.00479	0.004532	0.006243	0.006617	0.005537			4.394e-05	0.008015	0.0001696	2.448e-05	0.009976	2.276e-05			0.003583	0.00361	0.002688	0.003407	0.003163	0.001174			0.000294591	0.00020812	0.000233066	0.000393287	0.000648021	0.000326908
	0.003662	0.003759	0.003098	0.006312	0.008772	0.005256			4.391e-05	0.006891	0.0001218	1.568e-05	0.007576	2.423e-05			0.002476	0.001738	0.002001	0.003289	0.003349	0.001315			0.000264679	0.000358498	8.71962e-05	0.000424185	0.000654858	0.000277624
		0.006099	0.003702	0.008826	0.006768	0.018				0.01003	2.703e-05	2.497e-05	0.008848	2.286e-05			0.002689	0.002399	0.001907	0.002919	0.002404	0.001233			0.000162509	0.000221957	0.000127835	0.000441805	0.000358486	0.000294222
D								E								F
	A375 WT	+ RNF43	dKO	A375 IV	+ RNF43	dKO			A375 WT	+ RNF43	dKO	A375 IV	+ RNF43	dKO			A375 WT	+ RNF43	dKO	A375 IV	+ RNF43	dKO
	1	1.22278	1.1408	1.03462	1.59003	1.58024			0.01625	0.0149	0.01584	0.01419	0.0118	0.009087			1	0.888113	0.671825	0.460493	0.658746	1.13036
	1	0.89606	1.24975	0.787463	0.953122	1.20146			0.01087	0.0104	0.01456	0.01215	0.01217	0.0117			1	1.07049	0.633227	0.681219	0.494839	0.697677
	1	1.19265	2.05929	1.21553	1.4612	1.36554			0.01221	0.01508	0.01136	0.01349	0.01108	0.01284			1	0.784721	0.538106	0.376483	0.431051	0.922635
G
	A375 WT	+ RNF43	dKO	A375 IV	+ RNF43	dKO
	0.006326	0.00454	0.006177	0.005717	0.005345	0.005237
	0.005555	0.00457	0.004198	0.006665	0.005705	0.006989
	0.008387	0.006586	0.005965	0.006082	0.005017	0.007215
