# Supplementary material for: RNF43 inhibits WNT5A-driven signaling and suppresses melanoma invasion and resistance to the targeted therapy
Source: eLife. 2021 Oct 27;10:e65759. doi: 10.7554/eLife.65759 (PMC8550759; doi:10.7554/eLife.65759)
Supplement: Figure 4—figure supplement 3—source data 1. [file elife-65759-fig4-figsupp3-data1.xlsx]

## Sheet: Sheet1
A'	DOX-	D0X+			DOX-	D0X+		A''	DOX-	D0X+		DOX-	D0X+
	1	0.726629			1	0.936115			1	0.558014		1	0.986795
	1	0.477176			1	1.08007			1	0.608584		1	1.12495
	1	0.833896			1	0.731234			1	0.405144		1	1.0008
B'	DOX-	D0X+			DOX-	D0X+		B''	DOX-	D0X+		DOX-	D0X+
	1	0.302526			1	0.724662			1	0.203467		1	1.04928
	1	0.35875			1	0.803348			1	0.254489		1	1.26405
	1	0.798697			1	0.776481			1	0.372903		1	1.00145
