# Supplementary material for: RNF43 inhibits WNT5A-driven signaling and suppresses melanoma invasion and resistance to the targeted therapy
Source: eLife. 2021 Oct 27;10:e65759. doi: 10.7554/eLife.65759 (PMC8550759; doi:10.7554/eLife.65759)
Supplement: Figure 4—source data 1. [file elife-65759-fig4-data1.xlsx]

## Sheet: Sheet1
	A						B				E					E'
		Skin	Benign Melanocytic Skin Nevus	Cutaneous Melanoma				Primary site	Distant metastasis			A375 WT	A375 IV	A2058			A375 WT	A375 IV	A2058
		0.14689	0.93064	-2.35166				0.33034	0.55589			1	1.13371	0.073045			1	0.768323	0.31566
		1.21025	1.35084	-1.24263				-0.52655	0.60061			1	1.25885	0.063955			1	0.726367	0.289387
		0.86201	-1.04701	-1.83471				0.3209	0.69134			1	1.29284	0.067826			1	0.410402	0.437206
		0.26136	1.34312	-2.31564				-0.23866	-2.53983
		0.37471	1.01783	-3.071				0.7888	-0.99048
		0.68879	1.15348	-0.83758				-0.00527	0.3774
		1.90947	1.22868	-2.46572				1.02928	-0.28565
			0.93546	-2.39855				0.71774	0.27403
			0.98731	-3.26657				0.10263	0.074
			1.03285	-2.6605				1.07553	-0.91337
			0.82158	-0.94942				0.65236	0.07682
			1.62452	-2.4188				0.80434	0.2423
			1.45169	-2.87226				0.558	0.88242
			1.07397	-0.43788				0.49674	0.46242
			1.42707	-0.49524				0.81193	0.18252
			1.23918	-3.07708				0.12916	-1
			2.24963	-0.30577				1.15839	0.60934
			1.34439	0.70547				0.43829	0.49021
				-0.34069				1.59925	1.30547
				-0.5755				0.58496	-2.7356
				-1.86387				1.31873	-3.035
				-0.98637				1.15159	0.19745
				-0.6849				0.64467	-3.2864
				-1.57222				0.97491	-2.22064
				-0.69526				0.10543	-1.13973
				-1.46365				0.14573	0.77317
				-1.32756				0.56377	0.06218
				-1.8783				0.22239	-1.65728
				-2.44553				0.67388	-0.73219
				0.471				0.88171	0.11482
				-0.06834					-0.40766
				-0.07345					1
				-1.23834					-1.77259
				0.55538					-3.22764
				0.23956					0.27082
				-1.57702					-0.1324
				-2.48961					-0.5308
				-1.36649					-0.69616
				-0.63707					-0.56622
				-2.39259					0.90839
				-2.26382					0.61738
				-1.38655					-2.89616
				-0.37453					-0.31339
				-0.5562					-0.98193
				-2.41376					-1.27886
									-0.73638
									-0.05176
									-0.18966
									0.11094
									-2.25756
									-1.43211
									-0.58496
									-1.14136
