# Supplementary material for: RNF43 inhibits WNT5A-driven signaling and suppresses melanoma invasion and resistance to the targeted therapy
Source: eLife. 2021 Oct 27;10:e65759. doi: 10.7554/eLife.65759 (PMC8550759; doi:10.7554/eLife.65759)
Supplement: Figure 5—figure supplement 1—source data 1. [file elife-65759-fig5-figsupp1-data1.xlsx]

## Sheet: Sheet1
B
	ctrl	CCL21	CXCL12	RNF43	RNF43 CCL21	RNF43 CXCL12
	0.054409	0.311916	0.076223	0	0.011236	0.029915
	0.022472	0.055072	0.284519	0	0.010309	0
	0.017467	0.020134	0.154093	0	0.024768	0
D
	A375 WT	+ RNF43 #1	R/Z dKO #1	A375 IV	+ RNF43 #1	R/Z dKO #1
	1	0.344828	0.827586	1.51724	0.568966	1.89655
	1	0.897436	1.09615	1.01282	0.737179	1.33333
	1	0.365854	0.756098	2.02439	1.15854	1.34146
	1	0.657895	1.71053	1.15789	0.631579	1.26316
