# Supplementary material for: RNF43 inhibits WNT5A-driven signaling and suppresses melanoma invasion and resistance to the targeted therapy
Source: eLife. 2021 Oct 27;10:e65759. doi: 10.7554/eLife.65759 (PMC8550759; doi:10.7554/eLife.65759)
Supplement: Figure 5—source data 1. [file elife-65759-fig5-data1.xlsx]

## Sheet: Sheet1
B				C					D				E
	WT	WT + 43	WT dKO		WT	DOX-	DOX+		IV	IV + 43	IV dKO			parental line	DOX -	DOX +
	7.29	18.78	11.15		4.762	13.418	22.422		18.02	23.35	11.07			0.651	16.125	17.781
	8.48	32.38	22.39		7.6855	17.81	31.736		19.08	28.94	15.21			3.449	28.156	29.65
	5.35	26.93	13.27		7.1245	20.788	30.301		17.19	26.44	24.83			6.737	18.132	24.738
					14.608	23.868	34.61							9.178	25.044	34.05
G	ctrl	CCL21	CXCL12	RNF43	RNF43 CCL21	RNF43 CXCL12			G	ctrl	CCL21	CXCL12	RNF43	RNF43 CCL21	RNF43 CXCL12
	0.062963	0.527859	0.693009	0.05	0.029851	0.00431				0		0.792079	0	0	0
	0.09713	0.430894	1.14568	0.100228	0.015411	0.04059				0	0.726872	0.744841	0	0	0
	0.142857	0.673118	0.942993	0.121569	0.11332	0.074286				0	0.765625	0.89689	0	0.038961	0
										0	0.652249	0.678571	0	0	0
I							J	A375 WT	+ WNT5A	+ RNF43 #1	+ WNT5A	R/Z dKO #1	+ WNT5A	A375 IV	+ WNT5A	+ RNF43 #1	+ WNT5A	R/Z dKO #1	+ WNT5A
								16.47	30.89	3.88	6.5	13.68	18.1	16.18	13.1	4.65	5.05	4.72	15.97
A375 WT	+ RNF43#1	R/Z dKO #1	A375 IV	+ RNF43 #1	R/Z dKO #1			15.96	26.92	6.09	7.96	8.09	19.18	14.81	12.5	5.08	10.2	12.5	10.06
26	28	29	33	26	36			11.93	18.75	4.13	5.52	8.8	10.67	8.73	19.27	6.86	7.2	11.68	13.33
33	26	31	44	33	45
34	23	34	47	24	40
38	24	32	39	33	50
42	18	31	41	24	51
39	32	30	42	27	59
40	24	28	34	31	56
39	27	29	55	35	52
42	30	35	47	33	45
30	29	34	37	29	30
36	21	23	46	29	43
31	30	29	54	26	54
34	27	22	44	28	35
39	31	30	45	28	39
35	28	35	48	32	37
34	29	33	44	26	44
42	33	67	52	38	46
52	27	61	38	21	57
42	22	55	47	28	54
51	25	90	57	32	38
58	34	55	60	38	46
49	38	50	46	33	86
60	27	67	68	24	53
55	27	47	61	28	41
51	24	65	47	33	52
50	27	66	74	19	62
45	43	80	79	28	66
56	26	70	57	32	35
37	29	71	47	21	54
41	31	63	61	26	43
41	30	54	66	29	64
67	32	53	55	31	55
41	20	61	62	28	52
46	28	74		23	78
	50				56
