# Supplementary material for: RNF43 inhibits WNT5A-driven signaling and suppresses melanoma invasion and resistance to the targeted therapy
Source: eLife. 2021 Oct 27;10:e65759. doi: 10.7554/eLife.65759 (PMC8550759; doi:10.7554/eLife.65759)
Supplement: Figure 6—figure supplement 1—source data 1. [file elife-65759-fig6-figsupp1-data1.xlsx]

## Sheet: Sheet1
A						A'					B					B'
		A375 WT	Vemurafenib	A375 WT VR			A375 WT	Vemurafenib	A375 WT VR			A375 WT	Vemurafenib	A375 WT VR		A375 WT	Vemurafenib	A375 WT VR
		1	0.618895	1.69507			0.000605	0.00046	0.00325			1	1.18042	0.44292		0.000250213	0.000293715	0.000156313
		1	0.921745	3.85776			0.001557	0.000539	0.002999			1	1.59538	0.903574		9.75271e-05	8.86779e-05	8.24088e-05
		1	1.29096	3.85213			0.001308	0.001423	0.003633			1	1.29381	0.897874		0.000138812	0.000112374	0.000159987
C						D					E
	ctrl	Vemurafenib Res.	Cobimetinib Res.	Vem+Cob Res.			ctrl	Vemurafenib Res.	Cobimetinib Res.	Vem+Cob Res.		ctrl	Vemurafenib Res.	Cobimetinib Res.	Vem+Cob Res.
	0.016039	0.005058	0.0028	0.003524			0.004373	0.00454	0.00306	0.002503		1.15e-05	5.63e-06	4.96e-07	3.67e-06
	0.021186	0.006636	0.003552	0.003306			0.003853	0.003733	0.001994	0.002629		1.85e-05	9.13e-06	4.38e-07	6.45e-05
	0.020431	0.006026	0.002445	0.003871			0.003967	0.005276	0.001803	0.002493		1.33e-05	2.48e-05	2.7e-05	4.96e-06
