# Supplementary material for: RNF43 inhibits WNT5A-driven signaling and suppresses melanoma invasion and resistance to the targeted therapy
Source: eLife. 2021 Oct 27;10:e65759. doi: 10.7554/eLife.65759 (PMC8550759; doi:10.7554/eLife.65759)
Supplement: Figure 6—source data 1. [file elife-65759-fig6-data1.xlsx]

## Sheet: Sheet1
C					D						E					F
	A375 WT	+ Vemurafenib	A375 WT VR			A375 WT	+ Vemurafenib	A375 WT VR				A375 WT	A375 WT VR					A375 WT	Vemurafenib	A375 WT+ RNF43	Vemurafenib
	1	0.585368	1.2758			1	0.589323	1.49581				1	1.99504					1	0.45417	0.52381	0.02083
	1	0.413221	1.30761			1	0.194186	0.457249				1	1.63953					1	0.74658	0.861314	0.57123
	1	0.575974	1.69302			1	0.531248	1.69695				1	1.85839					1	0.935	0.550562	0.57
																		1	0.62088	0.445302	0.34644
																		1	0.79328	0.884131	0.5323
																		1		0.676056	0.21302
																		1		0.821918
																		1		0.345
																		1		0.316953
																		1		0.824289
																		1		0.52071
																		1		0.944751
																		1		0.250333
																		1		0.897196
																		1		0.872611
I						J						K
	ctrl	Vemurafenib Res.	Cobimetinib Res.	Vem+Cob Res.			ctrl	Vemurafenib Res.	Cobimetinib Res.	Vem+Cob Res.			ctrl	Vemurafenib Res.	Cobimetinib Res.	Vem+Cob Res.
	0.08059	0.141186	0.054618	0.052809			0.005464	0.003072	0.002415	0.001006			6.91e-05	0.000149	0.000139	0.000434
	0.100296	0.140861	0.054423	0.045073			0.008127	0.003233	0.002789	0.001016			2.59e-05	0.000323	0.000101	0.000732
	0.119445	0.162575	0.03034	0.047347			0.007429	0.002771	0.00227	0.001176			3.49e-05	0.000304	0.000172	0.000496
