# Supplementary material for: RNF43 inhibits WNT5A-driven signaling and suppresses melanoma invasion and resistance to the targeted therapy
Source: eLife. 2021 Oct 27;10:e65759. doi: 10.7554/eLife.65759 (PMC8550759; doi:10.7554/eLife.65759)
Supplement: Figure 7—figure supplement 1—source data 1. [file elife-65759-fig7-figsupp1-data1.xlsx]

## Sheet: Sheet1
B							C
	RNF43 mid	RNF43 mid + Vemurafenib	RNF43 high	RNF43 high + Vemurafenib				days	RNF43 low					RNF43 mid					RNF43 high
	48	32	1	22.5				0	0	0	0	0	0		0	0	0		0	0	0	0
	22.5	18	87.5	6				7	0.5	1	0	1	8		0	0	1.5		0	0	0	0
	8	40	32	22.5				14	75	62.5	847	320	318.5		0	0	1.5		0	8	0	0.5
		32	13.5	22.5				17	180	256	1296	526.5	800		8	0.5	8		0.5	22.5	1	1
		62.5						21	352	405	2025	847	1352		22.5	0.5	8		1	22.5	1	1
								28							48	22.5	8		1	87.5	32	13.5
								35							144	62.5	75		75	220.5	108	32
								42							364.5	108	245		162	245	126	62.5
								49							700	196	1183		445.5	294	245	171.5
								55							1568	405	2304		847	700	526.5	364.5
								62											1862		1152	907.5
								69
								76
								84
E							E'							E''						E'''
RNF43 low	RNF43 mid	RNF43 high	RNF43 mid + Vemurafenib	RNF43 high + Vemurafenib				RNF43 low	RNF43 mid	RNF43 high	RNF43 mid + Vemurafenib	RNF43 high + Vemurafenib		RNF43 low	RNF43 mid	RNF43 high	RNF43 mid + Vemurafenib	RNF43 high + Vemurafenib		RN43 mid and high	RN43 mid and high + Vemurafenib
6418.84	2112.11	1170.68	1692.38	3791.77				9179.64	956.284	4941.64	2911.5	1372.23		3.72478	0.810055	2.12534	0.900322	1.67231		8207.82	14481.2
5663.01	1610.99	4604.23	1340.31	3234.97				2823.91	2462.38	2656.67	671.385	2642.69		1.14445	1.41	0.678894	0.592066	2.61768		10502.9	13229.2
11916.4	3426.41	2283.06	916.142	4515.53				6561.52	1218.7	3912.69	1465.65	4208.52		3.94296	0.7812	2.41236	1.03982	2.74094		9413.63	12911.9
9835.25		1003.53	766.263	5794.01				5594.05		2143.26	1513.99	554.314		2.76485		0.987023	1.10015	0.746412		15614.5	17680.4
8406.67			2811.16					3137.03			2133.18			2.0907			1.17347			6436.39	12563.8
																				9063.84	12362.4
																				12218.5	14933.3
																					12291.1
																					8397
