# Supplementary material for: RNF43 inhibits WNT5A-driven signaling and suppresses melanoma invasion and resistance to the targeted therapy
Source: eLife. 2021 Oct 27;10:e65759. doi: 10.7554/eLife.65759 (PMC8550759; doi:10.7554/eLife.65759)
Supplement: Figure 7—source data 1. [file elife-65759-fig7-data1.xlsx]

## Sheet: Sheet1
A						C
	A375 WT ctrl	A375 WT RNF43 TetON DOX -	A375 WT RNF43 TetON DOX +			Days	RNF43 low	RNF43 mid	A375 RNF43 high			D					E						F
	6.6225e-06	0.000592026	0.0513342			28	1						A375 end point					RNF43	ROR1	Vangl2	pDVL2			Days	RNF43 mid	RNF43mid + Vemurafenib	RNF43 high + Vemurafenib	A375 RNF43 high
	4.67853e-06	0.000933786	0.0543852			28	1							RNF43 low	RNF43 mid/high			545.485	6418.84	9179	3.72478			28
	3.47483e-06	0.000728967	0.0533154			21	1							1352	48			161.243	5663.01	2823	1.14445			28
						28	1							1267.5	22.5			177.243	11916.4	6561	3.94296			21
						21	1							5000	8			337.95	9835.25	5594	2.76485			28
														2432				506.657	8406.67	3137	2.0907			21
						56		1						3971				33655.3	2112.11	956	0.810055			74
						69		1										8348.03	1610.99	2462	1.4146			56	1
						56		1										1526.46	3426.41	1218	0.7812			69	1
						69												14540.6	1170.68	4941	2.12534			56	1
						70												8364.83	4604.23	2656	0.678894			69		1
						70												18569.7	2283.06	3912	2.41236			84		1
						70												23864.5	1003.53	2143	0.987023			84		1
						62						F												84		1
						62			1															63		1
						56			1															62				1
						62			1															56				1
						62			1
																								62				1
																								62				1
G																								76			1
28	28	49	49	56	56	62	62
RNF43 mid + Vemurafenib	RNF43 mid + Vemurafenib	RNF43 mid + Vemurafenib	RNF43 high + Vemurafenib	RNF43 mid + Vemurafenib	RNF43 high + Vemurafenib	RNF43 mid + Vemurafenib	RNF43 high + Vemurafenib																	76			1
32	22.5	108	32	108	62.5	256	126																	76			1
18		56		56		180																		88			0
40	6	87.5	18	126	40	196	126
32	22.5	75	40	171.5	62.5	256	126
62.5	22.5	108	32	196	32	1098	108
											H
											days	RNF43 mid					RNF43 mid + Vemurafenib					RNF43 high + Vemurafenib
											0		0	0	0		0	0	0	0	0	0		0	0	0
											7		0	0	1.5		0	0	0	0	1	0		0	0.5	1
											14		0	0	1.5		32	8	1	0	8	6		0	8	22.5
											17		8	0.5	8		32	32	4	1	18	6		0.5	8	22.5
											21		22.5	0.5	8		32	8	4	6	32	6		0.5	10	22.5
											28		48	22.5	8		32	18	40	32	62.5	22.5		6	22.5	22.5
											35		144	62.5	75		32	32	40	32	32	22.5		6	22.5	22.5
											42		364.5	108	245		108	18	40	75	32	22.5		6	18	18
											49		700	196	1183		108	56	87.5	75	108	32		18	40	32
											55		1568	405	2304		108	56	126	171.5	196	62.5		40	62.5	32
											62						256	180	196	256	1098.5	126		126	126	108
											69						864	384	352	650	1098.5	526.5		196	550	126
